# Supplementary material for: Representativeness of the dabigatran, apixaban and rivaroxaban clinical trial populations to real-world atrial fibrillation patients in the United Kingdom: a cross-sectional analysis using the General Practice Research Database
Source: PubMed Central journal article supplement — BMJ Open. 2012 Dec 14;2(6):e001768. doi: 10.1136/bmjopen-2012-001768 (PMC3533028; doi:10.1136/bmjopen-2012-001768), 2012-12-14
Supplement: bmjopen-2012-001768.draft_revisions.pdf [file bmjopen-2012-001768.draft_revisions.pdf]

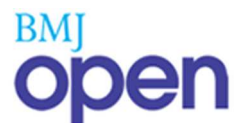

**Representativeness of the dabigatran, apixaban, and rivaroxaban clinical trial populations to real-world atrial fibrillation patients in the United Kingdom:  
A cross-sectional analysis using the General Practice Research Database**

|                                 |                                                                                                                |
|---------------------------------|----------------------------------------------------------------------------------------------------------------|
| Journal:                        | <i>BMJ Open</i>                                                                                                |
| Manuscript ID:                  | bmjopen-2012-001768                                                                                            |
| Article Type:                   | Research                                                                                                       |
| Date Submitted by the Author:   | 04-Jul-2012                                                                                                    |
| Complete List of Authors:       | Lee, Sally<br>Monz, Brigitta; Boehringer Ingelheim,<br>Clemens, Andreas<br>Brueckmann, Martina<br>Lip, Gregory |
| <b>Primary Subject Heading</b>: | Cardiovascular medicine                                                                                        |
| Secondary Subject Heading:      | Cardiovascular medicine                                                                                        |
| Keywords:                       | Thromboembolism < CARDIOLOGY, Stroke < NEUROLOGY, Stroke medicine < INTERNAL MEDICINE                          |
|                                 |                                                                                                                |

SCHOLARONE™  
Manuscripts

1  
2  
3  
4  
5 **Representativeness of the dabigatran, apixaban, and rivaroxaban clinical trial**  
6 **populations to real-world atrial fibrillation patients in the United Kingdom:**  
7 **A cross-sectional analysis using the General Practice Research Database**  
8  
9

10  
11 Sally Lee, PhD<sup>1</sup>, Brigitta U Monz, MD<sup>2</sup>, Andreas Clemens, MD<sup>3</sup>, Martina Brueckmann, MD<sup>3</sup>, Gregory YH  
12 Lip, MD<sup>4</sup>  
13

14 <sup>1</sup>Boehringer Ingelheim Ltd., UK

15  
16 <sup>2</sup>Boehringer Ingelheim GmbH, Ingelheim, Germany

17  
18 <sup>3</sup>Boehringer Ingelheim Pharma GmbH & Co. KG, Ingelheim, Germany

19  
20 <sup>4</sup>University of Birmingham Centre for Cardiovascular Sciences, City Hospital Birmingham, UK  
21  
22

23  
24 Corresponding Author:

25  
26 Name: Dr. Brigitta Monz, MD, MPH, MA Ethics in Medicine

27  
28 Address: Boehringer Ingelheim GmbH, Global Health Economics & Outcomes Research, Binger Str.  
29 173, 55216 Ingelheim am Rhein, Germany

30  
31 Email: [brigitta.monz@boehringer-ingelheim.com](mailto:brigitta.monz@boehringer-ingelheim.com)

32  
33 Fax: +49 (6132) 77 6146

34  
35 Telephone: +49 (6132) 7793362  
36  
37  
38  
39

40  
41 KEYWORDS: apixaban – atrial fibrillation – dabigatran – generalisibility – rivaroxaban  
42  
43

44  
45 WORD COUNT (excluding title page, abstract, references, and tables): 3514  
46  
47  
48  
49  
50  
51  
52  
53  
54  
55  
56  
57  
58  
59  
60

1  
2  
3  
4  
5  
6  
7  
8  
9  
10  
11  
12  
13  
14  
15  
16  
17  
18  
19  
20  
21  
22  
23  
24  
25  
26  
27  
28  
29  
30  
31  
32  
33  
34  
35  
36  
37  
38  
39  
40  
41  
42  
43  
44  
45  
46  
47  
48  
49  
50  
51  
52  
53  
54  
55  
56  
57  
58  
59  
60

**Abstract** Word count: 287 words (maximum 300 words)

**Objective:** Three oral anticoagulants have reported study results for stroke prevention in patients with atrial fibrillation (AF) (dabigatran etexilate, rivaroxaban, apixaban); all demonstrated superiority or non-inferiority compared with warfarin (RE-LY, ARISTOTLE, ROCKET-AF). This study aimed to assess the degree of generalisability of the results from RE-LY, ARISTOTLE, and ROCKET-AF to the real-world AF population, particularly the population eligible for anticoagulants, in the UK.

**Design:** A cross-sectional database analysis was conducted.

**Setting:** A dataset derived from the General Practice Research Database (GPRD).

**Primary and secondary outcomes measure:** The proportion of real-world patients with AF who met the inclusion/exclusion criteria for RE-LY, ARISTOTLE, and ROCKET-AF were compared. The results were then stratified by risk of stroke using CHADS<sub>2</sub> and CHA<sub>2</sub>DS<sub>2</sub>-VASc.

**Results:** 83,898 patients with AF were identified in the GPRD. For the population at intermediate or high risk of stroke and eligible for anticoagulant treatment (CHA<sub>2</sub>DS<sub>2</sub>-VASc  $\geq$  1; n=78,783 [94%]), the proportion eligible for inclusion into RE-LY (dabigatran etexilate) was 68% (95% CI:67.7%-68.3%; n=53,640), compared with 65% (95% CI:64.7%-65.3%; n=51,163) eligible for ARISTOTLE (apixaban) and 51% (95% CI:50.7%-51.4%; n=39,892) eligible for ROCKET-AF (rivaroxaban). Using the CHADS<sub>2</sub> method of risk stratification, for the population at intermediate or high risk of stroke and eligible for anticoagulation treatment (CHADS<sub>2</sub>  $\geq$  1; n=71,493 [85%]), the proportion eligible for inclusion into RE-LY was 74% (95% CI:73.7%-74.3%; n=52,783), compared with 72% (95% CI:71.7%-72.3%; n=51,415) for ARISTOTLE and 56% (95% CI:55.6%-56.4%; n=39,892) for ROCKET-AF.

**Conclusions:** Patients enrolled within RE-LY and ARISTOTLE were more reflective of the 'real-world' AF population in the UK, in contrast to patients enrolled within ROCKET-AF who were a more narrowly-defined group of patients at higher risk of stroke. Differences between trials should be taken into account when considering the generalisability of clinical trial findings.

## Article summary

### Article focus

- The focus of this study was to assess the generalisability of the findings of three randomised, controlled trials for stroke prevention in patients with atrial fibrillation (AF) to the real-world UK population of individuals with this condition, particularly to patients who would be eligible for anticoagulation under current guidelines.
- The three studies were RE-LY, ARISTOTLE and ROCKET-AF that investigated the efficacy and safety of dabigatran etexilate (dabigatran), apixaban and rivaroxaban compared to warfarin, respectively.

### Key messages

- Patients enrolled in RE-LY and ARISTOTLE were more reflective than patients enrolled in ROCKET-AF with respect to the real-world AF population in the UK, including the population eligible for anticoagulation.
- About 2/3 of patients recommended for anticoagulation would have been eligible to enrol into the clinical study investigating dabigatran (68%) or apixaban (65%) , but only about half of the patients would have been eligible for the rivaroxaban study (51%).
- Differences in generalisibility should be taken into account when transferring study findings to patient populations in routine care.

### Strengths and limitations of this study

- The source population for this research, i.e. the General Practice Research Database (GPRD) is the largest primary care database in the world, containing the records of a representative sample of the British population.

- Operationalisation of the inclusion and exclusion criteria of the clinical studies in order to assess the eligibility for study enrolment of patients seen in routine care required in some instances assumptions.
- AF diagnosis in the GPRD may not always be accurate. However, the majority of AF cases were correctly coded according to a recent systematic review, and any errors would not be expected to systematically bias the findings of this research.

For peer review only

## Background

Atrial fibrillation (AF) is the most common sustained cardiac arrhythmia, and is associated with an increased risk of stroke and other thromboembolic events. Approximately one in five of all strokes are caused by AF,<sup>1</sup> with the risk of stroke increased by four- to five-fold in patients with AF compared with the general population.<sup>2</sup> The condition is often asymptomatic,<sup>3</sup> but mortality in patients with chronic AF has been reported to be up to 2.5 times higher than in the general population, with the relative risk of death higher in women than in men.<sup>4</sup> The economic burden of AF is also high, with a key cost-driver being hospitalisation. This economic burden of AF has increased significantly over the last few decades, and is expected to increase even more in future due to aging populations.<sup>5</sup>

Oral anticoagulants form the current standard of care for patients with AF considered at intermediate to high risk of stroke, and are effective therapies for stroke prevention.<sup>1,3,6</sup> For many decades, warfarin was the only anticoagulant available; for now, three novel oral anticoagulant agents (dabigatran etexilate [later referred to as dabigatran], apixaban, and rivaroxaban) have demonstrated superiority or non-inferiority to warfarin with respect to the primary efficacy outcome of stroke or systemic embolism in Phase III randomised controlled trials.<sup>7-9</sup>

In RE-LY (n=18,113; ITT population), dabigatran at a dose of 150 mg twice daily was associated with a lower rate of stroke or systemic embolism (Relative Risk [RR], 95% Confidence Interval [CI]: 0.65, 0.52-0.81; p<0.001 for superiority) and did not significantly increase major bleeding (RR, 95% CI: 0.93, 0.81-1.07; p=0.32) when compared with warfarin. At a lower dose (110 mg, twice daily), dabigatran was associated with rates of stroke or systemic embolism that were similar to warfarin (RR, 95% CI: 0.90, 0.74-1.10; p<0.001 for non-inferiority) but significantly reduced major bleeding compared with warfarin (RR, 95% CI: 0.80, 0.70-0.93; p=0.003).<sup>7,10</sup> In ARISTOTLE (n=18,201; ITT population), apixaban (5 mg, twice daily) was associated with a lower rate of stroke or systemic embolism (Hazard Ratio [HR], 95% CI: 0.79, 0.66-0.95; p<0.001 for non-inferiority; p=0.01 for superiority) and reduced rates of major bleeding (HR, 95% CI: 0.69, 0.60-0.80; p<0.001) when compared with warfarin.<sup>9</sup> In ROCKET-AF (n=14,171; ITT population), rivaroxaban (20 mg, once daily) was associated with a similar rate of stroke or systemic embolism compared with warfarin (HR, 95%

1  
2  
3 CI: 0.88, 0.75-1.03;  $p < 0.001$  for non-inferiority,  $p = 0.12$  for superiority; ITT population) with no  
4 significant improvement in the rate of major bleeding (HR, 95% CI: 1.04, 0.90-1.20;  $p = 0.58$ , safety  
5 on treatment population).<sup>8</sup> Of these three anticoagulants, only dabigatran and rivaroxaban are  
6 currently approved in Europe for stroke prevention in patients with AF.<sup>11,12</sup>  
7  
8  
9

10  
11 Although these three RCTs have demonstrated that the three new anticoagulants are superior or non-  
12 inferior to warfarin in terms of stroke prevention, these studies applied specific inclusion and  
13 exclusion criteria that may have excluded patients who would otherwise be treated in real-life clinical  
14 practice. Therefore it is unknown whether the patient populations included in RE-LY, ARISTOTLE, and  
15 ROCKET-AF reflect 'real-world' patients with AF, and therefore whether the study results can be  
16 generalised to the wider patient population.  
17  
18  
19  
20  
21  
22  
23

24 To date there have been no studies comparing the eligibility criteria of these three trials. This study  
25 (RADAR: Representativeness and generalisability of the dabigatran, apixaban, and rivaroxaban clinical  
26 trial populations to real-world AF patients in the United Kingdom) aimed to assess the differences  
27 between the three trial populations of RE-LY, ARISTOTLE, and ROCKET-AF and the real-world  
28 patients with AF recorded within the General Practice Research Database (GPRD) in the United  
29 Kingdom (UK). An analysis on patients at intermediate- or high- risk of stroke allowed a focus on  
30 patients for whom, according to current clinical guidelines,<sup>1,3,6,13-15</sup> an anticoagulant could be  
31 prescribed. Risk of stroke is commonly assessed using stroke risk scores, such as the CHADS<sub>2</sub> score.<sup>16</sup>  
32 The CHA<sub>2</sub>DS<sub>2</sub>-VASc score has also been introduced and, based on multiple validation studies, is more  
33 accurate in identifying truly low-risk patients who do not require anticoagulation therapy and is at  
34 least as good as (possibly superior to) CHADS<sub>2</sub> in identifying high-risk patients who develop  
35 thrombembolism.<sup>16</sup> Both CHADS<sub>2</sub> and CHA<sub>2</sub>DS<sub>2</sub>-VASc scores were used to stratify patients in the  
36 current study.  
37  
38  
39  
40  
41  
42  
43  
44  
45  
46  
47  
48  
49

50 It was hypothesised that the trial populations within RE-LY, ROCKET-AF, and ARISTOTLE, as selected  
51 by the trial protocol inclusion and exclusion criteria, would vary in their generalisability to real-world  
52 AF populations, particularly for those eligible for anticoagulant treatment based on current guidelines.  
53  
54  
55  
56  
57  
58  
59  
60

## Design

### Objectives

The objective of this study was to assess the generalisability of RE-LY, ARISTOTLE, and ROCKET-AF to the real-world AF population in the UK. The study design was a cross-sectional database analysis.

### Data source

The GPRD was used as a source of information on the general AF population. In the UK, patients are semi-permanently registered at a specific practice where General Practitioners (GPs) provide primary care and make specialist referrals. These practices centralize the medical information from the GPs themselves, and also information from the specialist referrals and hospitalisations.<sup>17</sup> The GPRD is a computerised database comprising anonymous medical records from over 630 practices in the UK, covering approximately 8% of the UK population.<sup>18</sup> The database contains longitudinal data on patient demographics, diagnoses, referrals, prescribing, and health outcomes and has a geographical distribution that is representative of the UK population.<sup>19</sup> The median proportion of diagnoses correctly coded by the GPRD was recently demonstrated to be 89% (range 24% to 100%) in a systematic literature review of GPRD studies.<sup>20</sup> The GPRD has obtained ethical approval from a Multicentre Research Ethics Committee for all purely observational research using GPRD data; specifically, studies which do not include patient involvement.<sup>21</sup>

### Population

Patients from the GPRD were included if they had a diagnosis of non-valvular AF, were still alive and registered with a GP practice on the 31<sup>st</sup> March 2008, and were aged  $\geq 18$  years of age. An artificial randomisation date was defined for 31<sup>st</sup> March 2008 to allow sufficient time for the application of prospective exclusion criteria.

### Inclusion/exclusion criteria

The inclusion/exclusion criteria from RE-LY, ROCKET-AF, and ARISTOTLE were derived primarily from the trial design and rationale publications,<sup>22-24</sup> with clarification sought from supplementary



1  
2  
3 appendices and primary clinical trial result publications<sup>7-9</sup> where required. A full description of the  
4 inclusion and exclusion criteria applied is provided in the Supplementary Material. With respect to the  
5 ROCKET-AF trial, there was a contradiction between the hypertension risk factor inclusion criterion  
6 described in the ROCKET-AF rationale and design publication (systolic blood pressure  $\geq 180$  mmHg or  
7 diastolic blood pressure  $\geq 100$  mmHg)<sup>22</sup> and in the supplementary appendix of the results publication  
8 (use of antihypertensives within 6 months before screening or persistent systolic blood pressure  
9  $> 140$  mmHg or persistent diastolic blood pressure  $> 90$  mmHg)<sup>8</sup>. In the current analysis the more  
10 inclusive criterion from the supplementary appendix has been used in place of the trial design  
11 publication.  
12  
13  
14  
15  
16  
17  
18  
19

20  
21 The inclusion/exclusion criteria were then used to identify the total number of patients with AF in the  
22 GPRD who would meet the trial eligibility criteria. READ codes were used as the principal method of  
23 identifying patients from the GPRD who would meet the trial inclusion/exclusion criteria. READ codes  
24 are a coded thesaurus of clinical terms and form the basic means through which physicians record  
25 patient findings and interventions in health and social care IT systems within the UK.<sup>25</sup> Prescription  
26 data were also used to identify patients prescribed medications that may have affected their eligibility  
27 for one or more of the trials (e.g. long term non-steroidal anti-inflammatory drug usage), and test  
28 results were used to identify patients meeting criterion (e.g. abnormal platelet and haemoglobin  
29 levels) forming part of the exclusion criteria for the trials.  
30  
31  
32  
33  
34  
35  
36  
37  
38

39 The CHADS<sub>2</sub> and CHA<sub>2</sub>DS<sub>2</sub>-VASc scores were then used to stratify patients from the GPRD by risk of  
40 stroke (low, medium, and high). CHADS<sub>2</sub> assigns one point to patients for chronic heart failure,  
41 hypertension, age  $\geq 75$  years, and/or diabetes, and two points for history of stroke or transient  
42 ischemic attack (TIA). A score of 1 indicates an intermediate risk of stroke, a score of  $\geq 2$  indicates a  
43 high risk of stroke.<sup>3</sup> In contrast, CHA<sub>2</sub>DS<sub>2</sub>-VASc assigns one point for congestive heart failure,  
44 hypertension, diabetes, vascular disease, female gender, and/or age 65-74 years, and two points for  
45 history of stroke or TIA and/or age  $\geq 75$  years.<sup>16</sup> As with CHADS<sub>2</sub>, a score of 1 on the CHA<sub>2</sub>DS<sub>2</sub>-VASc  
46 indicates an intermediate risk of stroke, and a score of  $\geq 2$  indicates a high risk of stroke.<sup>16</sup>  
47  
48  
49  
50  
51  
52  
53  
54  
55  
56  
57  
58  
59  
60

## Outcomes

The outcomes of interest were the proportion of real-world patients with AF in the GPRD who would meet the inclusion/exclusion criteria for each of the three trials (RE-LY, ARISTOTLE, and ROCKET-AF), as well as the proportion of real-world patients with AF classified at intermediate or high risk of stroke who would meet the respective inclusion/exclusion criteria, stratified by the risk of stroke according to both the CHADS<sub>2</sub> and the CHA<sub>2</sub>DS<sub>2</sub>-VASc. The specific inclusion and exclusion criteria for each of the three trials were also examined to determine if there were key criteria causing differences between trials.

## Statistical Analysis

The proportion of patients from the GPRD who would be eligible for RE-LY was compared with the proportion that would be eligible for ARISTOTLE and ROCKET-AF using the Chi-squared test at a significance level of 5%.

## Results

### Patients eligible for RE-LY, ARISTOTLE, and ROCKET-AF

In total, 83,898 patients with AF were identified from the GPRD (Table 1). Of these patients, 64% met the inclusion/exclusion criteria for enrolment into RE-LY. This compares with 61% of patients who were eligible for inclusion into ARISTOTLE and 48% of patients who were eligible for inclusion into ROCKET-AF. The proportion of real-world patients who would be eligible for inclusion within the RE-LY trial was statistically significantly higher than the proportion of real-world patients who would be eligible for ARISTOTLE or ROCKET-AF ( $p < 0.001$  for both comparisons), though the small difference against ARISTOTLE is probably not clinically meaningful.

### Intermediate- and high-risk patients eligible for RE-LY, ARISTOTLE, and ROCKET-AF

In clinical practice, only patients considered at intermediate or high risk of stroke would receive anticoagulation therapy. Using the CHADS<sub>2</sub> score, 71,493 (85%) patients from the total GPRD AF population would be eligible for anticoagulant therapy, of which 74% would meet the RE-LY inclusion/exclusion criteria, 72% would meet the ARISTOTLE criteria, and 56% would meet the ROCKET-AF criteria (Table 1). Using the CHA<sub>2</sub>DS<sub>2</sub>-VASc score, 78,783 (94%) patients from the total GPRD population would be eligible for anticoagulant therapy, of which 68% would meet the RE-LY inclusion/exclusion criteria, 65% would meet the ARISTOTLE criteria, and 51% would meet the ROCKET-AF criteria (Table 1).

### Eligibility by individual inclusion and exclusion criterion

The inclusion rather than exclusion criteria were the primary determinants for the trial population in RE-LY (77% of GPRD AF population eligible), ARISTOTLE (81% of GPRD AF population eligible), and ROCKET-AF (63% of GPRD AF population eligible), as would be expected (Table 2). Within the inclusion criteria, the greatest difference between trials was seen with hypertension, where 81% of the GPRD AF population met this criterion in ROCKET-AF, compared to 59% of real-world patients for the RE-LY and ARISTOTLE hypertension criteria (Table 2). This difference, which favours ROCKET-AF over RE-LY and ARISTOTLE with respect to inclusivity, did not appear to be a major driver for

1  
2  
3 differences in overall inclusion eligibility for the trials. Instead, the differences in inclusion eligibility  
4 were not driven by an individual inclusion criterion, but by the different combinations of individual  
5 inclusion criteria within the trials. For the exclusion criteria specifically, the requirement for  
6 anticoagulant treatment for conditions other than AF excluded 6% of GPRD patients with AF from all  
7 trials, with renal impairment excluding a further 3% of the GPRD AF population. Although the  
8 exclusion criteria differed between trials, none of the individual criteria appear to be a key driver of  
9 the different proportions of real-world patients eligible for the trials (Table 2).  
10  
11  
12  
13  
14  
15  
16  
17  
18  
19  
20  
21  
22  
23  
24  
25  
26  
27  
28  
29  
30  
31  
32  
33  
34  
35  
36  
37  
38  
39  
40  
41  
42  
43  
44  
45  
46  
47  
48  
49  
50  
51  
52  
53  
54  
55  
56  
57  
58  
59  
60

## Discussion

The results of this analysis demonstrate that the pivotal trials for the novel oral anticoagulants dabigatran (RE-LY), apixaban (ARISTOTLE), and rivaroxaban (ROCKET-AF) vary in the generalisability of the AF population enrolled. Based on GPRD, the RE-LY trial enrolled a patient population that is most closely matched to patients with AF seen in general practice within the UK compared to the populations enrolled according to the exclusion/inclusion criteria for the other trials. Overall, 68% of intermediate- or high-risk patients with AF captured within the GPRD would be eligible for inclusion into RE-LY, as compared with 65% and 51% for ARISTOTLE and ROCKET-AF respectively (as categorised by  $\text{CHA}_2\text{DS}_2\text{-VASc} \geq 1$ ). Being more inclusive and representative of the general AF population allows trial findings to be more readily generalised to patients seen in everyday clinical practice (and eligible for anticoagulant therapy). The RE-LY patient population is also slightly more inclusive of AF patients eligible for anticoagulant treatment, than the population in the ARISTOTLE trial (difference of 3%;  $p < 0.001$ ) but this statistically significant difference between the RE-LY and ARISTOTLE populations would not necessarily translate into clinically meaningful differences for the real-world population.

It is important to note that a higher risk patient population was intentionally enrolled in ROCKET-AF (mean  $\text{CHADS}_2$  risk score of 3.48) compared with both the RE-LY (mean  $\text{CHADS}_2$  risk score of 2.1) and ARISTOTLE (mean  $\text{CHADS}_2$  risk score of 2.2) trials, and thus, a large number of patients who would be eligible for anticoagulant treatment under current guidelines would not have been entered into ROCKET-AF. Indeed, a significant number of patients who could be eligible for anticoagulation in general practice (intermediate or high risk of stroke according to the  $\text{CHADS}_2$  risk score) and who would be included within RE-LY are excluded from ROCKET-AF (18%). In total, 13,748 patients with AF eligible for the RE-LY study would have been excluded from the ROCKET-AF trial within the total GPRD AF population (low, intermediate, or high risk of stroke). Thus, some care should be taken when generalizing the trial results from the high risk subpopulation seen in ROCKET-AF to the general AF population encountered in clinical practice.

Trial generalisability (external validity) is a recognised problem in randomised controlled trials. The

1  
2  
3 trial participants enrolled in a trial may differ considerably from the target population/clinical practice  
4 in which the trial's findings are later used, and trial eligibility criteria can contribute to this lack of  
5 generalisability.<sup>26</sup> The current analysis indicates that the rate of inclusion observed within the RE-LY  
6 trial (and probably, ARISTOTLE) is at least as representative of the general population as other  
7 pivotal trials have been found to be. For example, a recent analysis of patients enrolled in eight  
8 placebo controlled clinical trials for amyotrophic lateral sclerosis (ALS) found that 66% of patients  
9 diagnosed with ALS in Italy between 2003 and 2008 met the eligibility criteria for the trials.<sup>27</sup>  
10 However, this analysis reported that the ALS patients enrolled within the clinical trials were  
11 demographically and clinically different from the patients within the national ALS population, with the  
12 differences between the trial cohorts and patient population resulting in part from the different  
13 eligibility criteria used and in part from factors unrelated to enrolment criteria. With respect to risk of  
14 stroke as determined by CHADS<sub>2</sub> score, 26% of individuals in a study of the incidence and prevalence  
15 of chronic AF in the UK (using also the GPRD as a data source), had a CHADS<sub>2</sub> score of  $\geq 3$ ,<sup>17</sup>  
16 compared with 33% in RE-LY,<sup>7</sup> 32% in ARISTOTLE,<sup>9</sup> and 87% in ROCKET-AF.<sup>8</sup> This demonstrates  
17 that both RE-LY and ARISTOTLE were substantially more reflective of the real-world AF population  
18 (based on the GPRD) than ROCKET-AF when considering the proportion of the population at differing  
19 risk of stroke. It is interesting to note that little research has actually been conducted to quantify the  
20 representativeness of trial populations with regards to real life populations. This is surprising given  
21 that the external validity of trials is always questioned, especially in the context of reimbursement  
22 decisions and Health Technology Assessments (HTA). More systematic research in this area appears  
23 to be warranted, particularly with respect to how the external validity of a trial then affects the  
24 'translation' of efficacy to effectiveness.  
25  
26  
27  
28  
29  
30  
31  
32  
33  
34  
35  
36  
37  
38  
39  
40  
41  
42  
43  
44  
45

46 When classifying patient risk, risk groups stratified by the CHA<sub>2</sub>DS<sub>2</sub>-VASc score may be considered to  
47 be more accurate than those stratified by CHADS<sub>2</sub>, particularly to identify 'truly low risk' patients who  
48 do not need any antithrombotic therapy, due to the more inclusive nature of common stroke risk  
49 factors in CHA<sub>2</sub>DS<sub>2</sub>-VASc.<sup>16</sup> This is important when considering the results of the current study, since  
50 the intermediate or high risk population by CHA<sub>2</sub>DS<sub>2</sub>-VASc included 7,290 more patients than did the  
51 intermediate or high risk population by CHADS<sub>2</sub>. These patients are at risk of stroke but may not  
52  
53  
54  
55  
56  
57  
58  
59  
60

1  
2  
3 receive treatment if miscategorised as low risk by the CHADS<sub>2</sub> score; indeed, one recent analysis  
4 suggests that a CHADS<sub>2</sub> score=0 is not low risk with stroke rates that can range between 0.8% per  
5 year to 3.2% per year when subdivided by CHA<sub>2</sub>DS<sub>2</sub>-VASc score.<sup>28</sup> The 2010 ESC guidelines suggest  
6 that although CHADS<sub>2</sub> is useful as a simple initial means of assessing risk, patients scoring 0 or 1  
7 should undergo more comprehensive assessment, for example with CHA<sub>2</sub>DS<sub>2</sub>-VASc.<sup>1</sup>  
8  
9  
10  
11  
12

### 13 **Limitations**

14  
15  
16 It should be noted that a number of the criteria included in the trial design for RE-LY, ARISTOTLE,  
17 and ROCKET-AF were not recorded in the GPRD or were difficult to extract. For example, planned  
18 major surgery would not be captured within the database, nor would a life expectancy of less than 1  
19 year, both of which are exclusion criteria in one or more of the trials. However, these criteria were  
20 likely to have had minimal impact on the final populations included within the RCTs, since many of  
21 the criteria that could not be applied to the GPRD population were consistent across all three trials.  
22 This means that the impact of applying the individual criterion would be the same across RE-LY,  
23 ARISTOTLE, and ROCKET-AF, with only the order of magnitude affected. A potential limitation of the  
24 current study is that the analyses were reliant on the quality of GP coding in the GPRD dataset. A  
25 recent systematic review of the validity of diagnostic coding in the GPRD reported that >80% of  
26 events such as myocardial infarction and stroke were correctly coded, but a lower proportion (64.4%)  
27 of AF cases were correctly coded.<sup>29</sup> This means that there may be some error in the characteristics of  
28 the GPRD population taken to be a reflection of the general AF population in the UK. However, this is  
29 unlikely to affect the conclusion drawn from the current study, since the errors in coding are unlikely  
30 to be focused on a specific subgroup of patients and instead would be expected to be distributed  
31 across the whole AF population in the UK. Although the total number of patients classified as having  
32 AF in the GPRD may be lower than the total number of patients with AF in the UK, there is no reason  
33 to suspect that the patients miscoded would have systematically differed in characteristics to those  
34 correctly coded within the database.  
35  
36  
37  
38  
39  
40  
41  
42  
43  
44  
45  
46  
47  
48  
49  
50  
51  
52  
53  
54  
55  
56  
57  
58  
59  
60

## Conclusion

Trial generalisability is an important consideration for the National Institute of Health and Clinical Excellence (NICE) in the UK and other such HTA bodies, with past criticisms focusing on the lack of generalisability of trials as a result of the eligibility criteria applied.<sup>30-32</sup> The current analysis demonstrates that the data from RE-LY and ARISTOTLE are applicable to a larger proportion of real-world AF patients than data from ROCKET-AF, meaning that the results from the study supporting the use of dabigatran and apixaban are more generalizable to the general anticoagulant eligible AF population.



## Acknowledgements

With thanks to James Cann and Ebony Samuels at HERON Evidence Development for contributing to the preparation of the initial draft manuscript.

## Funding source

The study was funded by Boehringer Ingelheim International GmbH.

## Author contributions

SL was responsible for study design, data extraction, and statistical analysis; BM, AC, MB, and GL contributed to study concept, design, and data interpretation. All authors reviewed and significantly contributed to the initial draft manuscript and approved the final submitted version.

## Conflict of interest

SL, BM, AC, and MB are employees of Boehringer Ingelheim. GYHL has served as a consultant for Bayer, Astellas, Merck, Sanofi, BMS/Pfizer, Daiichi-Sankyo, Biotronik, Portola and Boehringer Ingelheim and has been on the speakers' bureau for Bayer, BMS/Pfizer, Boehringer Ingelheim, and Sanofi Aventis.

## References

- 1 AJ KP, Lip GY, Schotten U. Guidelines for the management of atrial fibrillation: the Task Force for the Management of Atrial Fibrillation of the European Society of Cardiology. *Eur Heart J* 2010;**31**:2369-429.
- 2 Wolf PA, Abbott RD, Kannel WB. Atrial fibrillation as an independent risk factor for stroke: the Framingham Study. *Stroke* 1991;**22**:983-8.
- 3 National Collaborating Centre for Chronic Conditions. Atrial fibrillation: national clinical guidelines for management in primary and secondary care. London: Royal College of Physicians; 2006.
- 4 Ruigomez A, Johansson S, Wallander MA, et al. Risk of mortality in a cohort of patients newly diagnosed with chronic atrial fibrillation. *BMC Cardiovasc Disord* 2002;**2**:5.
- 5 Wolowacz SE, Samuel M, Brennan VK, et al. The cost of illness of atrial fibrillation: a systematic review of the recent literature. *Europace* 2011;**13**:1375-85.
- 6 Fuster V, Ryden LE, Cannom DS, et al. ACC/AHA/ESC 2006 Guidelines for the management of patients with atrial fibrillation: a report of the American College of Cardiology/American Heart Association Task Force on Practice Guidelines and the European Society of Cardiology Committee for Practice Guidelines (Writing Committee to Revise the 2001 Guidelines for the Management of Patients With Atrial Fibrillation). *Circulation* 2006;**114**:e257-e354.
- 7 Connolly SJ, Ezekowitz MD, Yusuf S, et al. Dabigatran versus warfarin in patients with atrial fibrillation (with supplementary appendix). *N Engl J Med* 2009;**361**:1139-51.
- 8 Patel MR, Mahaffey KW, Garg J, et al. Rivaroxaban versus warfarin in nonvalvular atrial fibrillation (with supplementary appendix). *New Engl J Med* 2011;**365**:883-91.
- 9 Granger CB, Alexander JH, McMurray JJV, et al. Apixaban versus warfarin in patients with atrial fibrillation (including supplementary appendix and study protocol). *New Engl J Med* 2011;**365**:981-92.
- 10 Connolly SJ, Ezekowitz MD, Yusuf S, et al. Newly identified events in the RE-LY trial. *New Engl J Med* 2010;**363**:1875-6.
- 11 Boehringer Ingelheim. Pradaxa 150 mg: summary of product characteristics. emc 2011 August 18 [cited 2011 Nov 8];Available from: URL: <http://www.medicines.org.uk/EMC/medicine/24839/SPC/Pradaxa+150+mg+hard+capsules/>
- 12 Bayer plc. Xarelto 20mg film-coated tablets. emc 2011 [cited 2012 Feb 13];Available from: URL: <http://www.medicines.org.uk/EMC/medicine/25586/SPC/Xarelto+20mg+film-coated+tablets/>
- 13 Wann LS, Curtis AB, Ellenbogen KA, et al. 2011 ACCF/AHA/HRS focused update on the management of patients with atrial fibrillation (update on dabigatran). A report of the American College of Cardiology Foundation/American Heart Association Task Force on Practice Guidelines. *Heart Rhythm* 2011;**8**:e1-e8.

- 1  
2  
3 14 You JJ, Singer DE, Howard PA, et al. Antithrombotic therapy for atrial fibrillation: Antithrombotic  
4 Therapy and Prevention of Thrombosis, 9th ed: American College of Chest Physicians Evidence-  
5 Based Clinical Practice Guidelines. *Chest* 2012;**141**:e531S-e575S.  
6  
7 15 Skanes AC, Healey JS, Cairns JA, et al. Focused 2012 update of the Canadian Cardiovascular  
8 Society atrial fibrillation guidelines: recommendations for stroke prevention and rate/rhythm  
9 control. *Can J Cardiol* 2012;**28**:125-36.  
10  
11 16 Lip GYH, Nieuwlaat R, Pisters R, et al. Refining clinical risk stratification for predicting stroke  
12 and thromboembolism in atrial fibrillation using a novel risk factor-based approach: the Euro  
13 heart survey on atrial fibrillation. *Chest* 2010;**137**:263-72.  
14  
15 17 Rietbrock S, Heeley E, Plumb J, et al. Chronic atrial fibrillation: incidence, prevalence, and  
16 prediction of stroke using the Congestive heart failure, Hypertension, Age >75, Diabetes  
17 mellitus, and prior Stroke or transient ischemic attack (CHADS2) risk stratification scheme. *Am*  
18 *Heart J* 2008;**156**:57-64.  
19  
20 18 General Practice Research Database. The database. Medicines and Healthcare products  
21 Regulatory Agency 2011 [cited 2011 Nov 2];Available from: URL:  
22 <http://www.gprd.com/products/database.asp>  
23  
24 19 Garcia Rodriguez LA, Perez Gutthann S. Use of the UK General Practice Research Database for  
25 pharmacoepidemiology. *Br J Clin Pharmacology* 1998;**45**:419-25.  
26  
27 20 Herrett E, Thomas SL, Schoonen WM, et al. Validation and validity of diagnoses in the General  
28 Practice Research Database: a systematic review. *Br J Clin Pharmacology* 2010;**69**:4-14.  
29  
30 21 General Practice Research Database. Ethical review for GPRD protocols. Medicines and  
31 Healthcare products Regulatory Agency 2012 [cited 2012 Jan 26];Available from: URL:  
32 <http://www.gprd.com/isac/#ethicalReview>  
33  
34 22 Patel M. Rivaroxaban once-daily, oral, direct factor Xa inhibition compared with vitamin K  
35 antagonism for prevention of stroke and embolism trial in atrial fibrillation: rationale and design  
36 of the ROCKET AF study. *Am Heart J* 2010;**159**:340-7.  
37  
38 23 Lopes RD, Alexander JH, Al-Khatib SM, et al. Apixaban for reduction in stroke and other  
39 thromboembolic events in atrial fibrillation (ARISTOTLE) trial: design and rationale. *Am Heart J*  
40 2010;**159**:331-9.  
41  
42 24 Ezekowitz MD, Connolly S, Parekh A, et al. Rationale and design of RE-LY: randomized  
43 evaluation of long-term anticoagulant therapy, warfarin, compared with dabigatran. *Am Heart J*  
44 2009;**157**:805-10, 810.  
45  
46 25 National Health Service. READ codes. NHS Connecting for Health 2011 [cited 2011 Dec  
47 14];Available from: URL:  
48 <http://www.connectingforhealth.nhs.uk/systemsandservices/data/uktc/readcodes>  
49  
50 26 Weiss NS, Koepsell TD, Psaty BM. Generalizability of the results of randomized trials. *Arch*  
51 *Intern Med* 2008;**168**:133-5.  
52  
53  
54  
55  
56  
57  
58  
59  
60

- 1  
2  
3 27 Chio A, Canosa A, Gallo S, et al. ALS clinical trials: do enrolled patients accurately represent the  
4 ALS population? *Neurology* 2011;**77**:1432-7.  
5  
6 28 Olesen JB, Torp-Pedersen C, Hansen ML, et al. The value of the CHA2DS2-VASc score for  
7 refining stroke risk stratification in patients with atrial fibrillation with a CHADS2 score 0-1: A  
8 nationwide cohort study. *Thromb Haemost* 2012;**107**:1172-9.  
9  
10 29 Khan N, Harrison S, Rose P. Validity of diagnostic coding within the General Practice Research  
11 Database: a systematic review. *Br J Gen Pract* 2011;**60**:e128-e136.  
12  
13 30 Burns T. NICE guidance in schizophrenia: how generalisable are drug trials? *The Psychiatrist*  
14 2006;**30**:210-2.  
15  
16 31 National Institute for Health and Clinical Excellence. Erlotinib monotherapy for maintenance  
17 treatment of non-small-cell lung cancer. 2011. Report No.: TA227.  
18  
19 32 National Institute for Health and Clinical Excellence. Dronedarone for the treatment of non-  
20 permanent atrial fibrillation. 2010. Report No.: TA197.  
21  
22  
23  
24  
25  
26  
27  
28  
29  
30  
31  
32  
33  
34  
35  
36  
37  
38  
39  
40  
41  
42  
43  
44  
45  
46  
47  
48  
49  
50  
51  
52  
53  
54  
55  
56  
57  
58  
59  
60

## Tables

**Table 1: Proportion of GPRD AF patients who met inclusion/exclusion criteria for RE-LY, ARISTOTLE, and ROCKET-AF, stratified by risk of stroke and assessment method**

| Patient population                         | Anticoagulant eligibility                                                                                          | GPRD AF patient population, N (%) | RE-LY<br>GPRD AF patients meeting trial criteria, n (% [95% CI]) | ARISTOTLE<br>GPRD AF patients meeting trial criteria n (% [95% CI]) | ROCKET-AF<br>GPRD AF patients meeting trial criteria, n (% [95% CI]) |
|--------------------------------------------|--------------------------------------------------------------------------------------------------------------------|-----------------------------------|------------------------------------------------------------------|---------------------------------------------------------------------|----------------------------------------------------------------------|
| Total GPRD AF population                   | Not anticoagulant-eligible/potentially anticoagulant-eligible/should receive anticoagulant according to guidelines | 83,898 (100%)                     | 53,640 (64% [63.59-64.41])                                       | 51,415 (61% [60.58-61.42])                                          | 39,892 (48% [47.66-48.34])                                           |
| <b>Intermediate- or high-risk patients</b> |                                                                                                                    |                                   |                                                                  |                                                                     |                                                                      |
| CHADS <sub>2</sub> ≥1                      | Potentially anticoagulant-eligible/should receive anticoagulant according to guidelines                            | 71,493 (85%)                      | 52,783 (74% [73.68-74.32])                                       | 51,415 (72% [71.67-72.33])                                          | 39,892 (56% [55.64-56.36])                                           |
| CHA <sub>2</sub> DS <sub>2</sub> -VASc ≥1  | Potentially anticoagulant-eligible/should receive anticoagulant according to guidelines                            | 78,783 (94%)                      | 53,640 (68% [67.67-68.33])                                       | 51,163 (65% [64.67-65.33])                                          | 39,892 (51% [50.65-51.35])                                           |
| <b>High-risk patients</b>                  |                                                                                                                    |                                   |                                                                  |                                                                     |                                                                      |
| CHADS <sub>2</sub> ≥2                      | Should receive anticoagulant according to guidelines                                                               | 49,099 (59%)                      | 38,493 (78% [77.63-78.37])                                       | 35,712 (73% [72.61-73.39])                                          | 39,892 (81% [80.65-81.35])                                           |
| CHA <sub>2</sub> DS <sub>2</sub> -VASc ≥2  | Should receive anticoagulant according to guidelines                                                               | 72,824 (87%)                      | 53,059 (73% [72.68-73.32])                                       | 50,623 (70% [69.67-70.33])                                          | 39,835 (55% [54.64-55.36])                                           |

AF: Atrial Fibrillation; CI: Confidence Interval; GPRD: General Practice Research Database

**Table 2: Proportion of GPRD AF patients eligible for trial participation according to each inclusion/exclusion criteria identified for RE-LY, ARISTOTLE, and ROCKET-AF**

| Criterion                                                                                       | RE-LY<br>N (%) real-world AF<br>patients meeting<br>criterion | ARISTOTLE<br>N (%) real-world<br>patients meeting<br>criterion | ROCKET-AF<br>N (%) real-world<br>patients meeting<br>criterion |
|-------------------------------------------------------------------------------------------------|---------------------------------------------------------------|----------------------------------------------------------------|----------------------------------------------------------------|
| <b>Inclusion</b>                                                                                |                                                               |                                                                |                                                                |
| AF                                                                                              | 83,898 (100)                                                  | 83,898 (100)                                                   | 83,898 (100)                                                   |
| Age ≥ 75 years                                                                                  | 51,034 (61)                                                   | 51,267 (61)                                                    | 51,034 (61)                                                    |
| Stroke, TIA, systemic embolism                                                                  | 11,632 (14)                                                   | 10,577 (13)                                                    | 11,632 (14)                                                    |
| Risk factors                                                                                    |                                                               |                                                                |                                                                |
| Congestive heart failure                                                                        | 1737 (2)                                                      | 16,184 (19)                                                    | 16,009 (19)                                                    |
| Ejection fraction                                                                               |                                                               |                                                                |                                                                |
| Age ≥ 65 years                                                                                  | 70,047 (83)                                                   | -                                                              | -                                                              |
| Diabetes mellitus                                                                               | 3945 (5)                                                      | 14,940 (18)                                                    | 14,850 (18)                                                    |
| Hypertension                                                                                    | 49,747 (59)                                                   | 49,747 (59)                                                    | 67,833 (81)                                                    |
| Coronary artery disease                                                                         | 28,687 (34)                                                   | -                                                              | -                                                              |
| Overall inclusion criteria                                                                      | 64,710 (77)*                                                  | 67,956 (81)†                                                   | 52,540 (63)‡                                                   |
| <b>Exclusion</b>                                                                                |                                                               |                                                                |                                                                |
| Reversible causes of AF                                                                         | 1,124 (1)                                                     | 2,938 (4)                                                      | 350 (<1)                                                       |
| Mitral valve stenosis                                                                           | -                                                             | 1,213 (1)                                                      | 1213 (1)                                                       |
| Heart valve disorders and conditions other than AF that require chronic anticoagulant treatment | 5,202 (6)                                                     | 5,202 (6)                                                      | 5,202 (6)                                                      |
| Conditions other than AF requiring chronic anticoagulant treatment                              |                                                               |                                                                |                                                                |
| Heart valve disorder                                                                            | 4,792 (6)                                                     |                                                                | 0 (0)                                                          |
| Stroke or TIA                                                                                   |                                                               |                                                                |                                                                |
| Recent stroke                                                                                   | 429 (1)                                                       | 62 (<1)                                                        | 429 (1)                                                        |
| Recent TIA                                                                                      | -                                                             | -                                                              | 71 (<1)                                                        |
| Increased risk of bleeding                                                                      | 1,044 (1)                                                     | 1,044 (1)                                                      | 1,044 (1)                                                      |
| Intracranial neoplasm, arteriovenous malformation, or aneurysm                                  | -                                                             | -                                                              | 2350 (3)                                                       |
| Uncontrolled hypertension                                                                       | 2,014 (2)                                                     | 2,014 (2)                                                      | 2,014 (2)                                                      |
| Planned cardioversion                                                                           | -                                                             | -                                                              | 843 (1)                                                        |
| Renal impairment                                                                                | 2,149 (3)                                                     | 2,149 (3)                                                      | 2,149 (3)                                                      |
| ASA at specified dose                                                                           | -                                                             | 1,629 (2)                                                      | 1,767 (2)                                                      |
| ASA + thienopyridine                                                                            | -                                                             | 203 (<1)                                                       | 203 (<1)                                                       |
| Intravenous antiplatelets                                                                       | -                                                             | -                                                              | 0 (0)                                                          |
| Other concomitant treatments                                                                    |                                                               |                                                                |                                                                |
| Fibrinolytics                                                                                   | 0 (0)                                                         | -                                                              | 0 (0)                                                          |
| NSAID                                                                                           | -                                                             | -                                                              | 2,729 (3)                                                      |
| P450 3A4 inhibitor                                                                              | -                                                             | -                                                              | 4 (<1)                                                         |
| P450 3A4 inducer                                                                                | -                                                             | -                                                              | 1,125 (1)                                                      |
| Investigational drug                                                                            | 0 (0)                                                         | 0 (0)                                                          | 0 (0)                                                          |
| Other concomitant conditions                                                                    |                                                               |                                                                |                                                                |
| Liver disease                                                                                   | 1,547 (2)                                                     | -                                                              | 1,547 (2)                                                      |
| Hepatitis A, B, or C                                                                            | 698 (<1)                                                      | -                                                              | -                                                              |
| HIV                                                                                             | -                                                             | -                                                              | 14 (<1)                                                        |
| Active infective endocarditis                                                                   | 8 (<1)                                                        | 8 (<1)                                                         | 8 (<1)                                                         |
| Anemia                                                                                          | 794 (1)                                                       | 794 (1)                                                        | 794 (1)                                                        |
| Substance abuse and psychosocial                                                                | 28 (<1)                                                       | 28 (<1)                                                        | -                                                              |
| INR monitoring                                                                                  | -                                                             | 3,513 (4)                                                      | -                                                              |
| <b>Overall inclusion and exclusion criteria</b>                                                 | <b>53,640 (64%)</b>                                           | <b>51,415 (61%)</b>                                            | <b>39,892 (48%)</b>                                            |

\*Inclusion criteria for RE-LY specify AF plus at least one of age ≥75 years; history of previous stroke, TIA or systemic embolism; ejection fraction <40%; or symptomatic heart failure OR AF plus age ≥65 years plus one of diabetes mellitus; documented coronary artery disease; or hypertension requiring medical treatment<sup>7</sup>

†Inclusion criteria for ARISTOTLE specify AF plus at least one of age ≥75 years; prior stroke; symptomatic congestive heart failure or ejection fraction ≤40%; diabetes; or hypertension requiring pharmacological treatment<sup>23</sup>

‡Inclusion criteria for ROCKET-AF specify AF plus history of stroke, TIA, or systemic embolism OR AF plus at least two of age ≥75 years; congestive heart failure or ejection fraction ≤35%; or diabetes; or hypertension<sup>22</sup>

Note that the planned cardioversion exclusion criterion within the ROCKET-AF trial was conceptualised within the study by excluding patients having cardioversion within 12 months of the index date

1  
2  
3 AF: Atrial Fibrillation; ASA: acetylsalicylic acid; GPRD: General Practice Research Database; HIV: Human Immunodeficiency  
4 Virus; INR: International Normalised Ratio; NSAID: Non-Steroidal Anti-Inflammatory Drug; TIA: Transient Ischemic Attack  
5  
6  
7  
8  
9  
10  
11  
12  
13  
14  
15  
16  
17  
18  
19  
20  
21  
22  
23  
24  
25  
26  
27  
28  
29  
30  
31  
32  
33  
34  
35  
36  
37  
38  
39  
40  
41  
42  
43  
44  
45  
46  
47  
48  
49  
50  
51  
52  
53  
54  
55  
56  
57  
58  
59  
60

For peer review only

## Supplementary data

A description of the inclusion and exclusion criteria for each trial is provided in the table.

**Table: Inclusion/exclusion criteria for RE-LY, ARISTOTLE, and ROCKET-AF**

| Criterion type                                                                                  | RE-LY                                                                                                                                                                                                                                                                                                                                                                                                                                                                                                                                                          | ARISTOTLE                                                                                                                                                                                                                                                                 | ROCKET-AF                                                                                                                                                                                                                                                                                                                                                                                                                                                                                                                                   |
|-------------------------------------------------------------------------------------------------|----------------------------------------------------------------------------------------------------------------------------------------------------------------------------------------------------------------------------------------------------------------------------------------------------------------------------------------------------------------------------------------------------------------------------------------------------------------------------------------------------------------------------------------------------------------|---------------------------------------------------------------------------------------------------------------------------------------------------------------------------------------------------------------------------------------------------------------------------|---------------------------------------------------------------------------------------------------------------------------------------------------------------------------------------------------------------------------------------------------------------------------------------------------------------------------------------------------------------------------------------------------------------------------------------------------------------------------------------------------------------------------------------------|
| <b>Inclusion</b>                                                                                |                                                                                                                                                                                                                                                                                                                                                                                                                                                                                                                                                                |                                                                                                                                                                                                                                                                           |                                                                                                                                                                                                                                                                                                                                                                                                                                                                                                                                             |
| Age                                                                                             | ≥18 years                                                                                                                                                                                                                                                                                                                                                                                                                                                                                                                                                      | ≥18 years                                                                                                                                                                                                                                                                 | ≥18 years                                                                                                                                                                                                                                                                                                                                                                                                                                                                                                                                   |
| AF                                                                                              | AF documented by ECG on enrolment; or symptomatic episode of paroxysmal or persistent AF documented by 12-lead ECG within 6 months before randomisation; or asymptomatic or symptomatic paroxysmal or persistent AF on 2 separate occasions, at least 1 day apart, one of which is within 6 months of randomisation, lasting ≥30 seconds and documented by 12-lead ECG, rhythm strip, pacemaker/ICD electrogram or Holter monitor                                                                                                                              | AF or atrial flutter documented by ECG on enrolment; or AF or atrial flutter documented by ECG or as an episode lasting ≥1 minute on rhythm strip, Holter monitor, or intracardiac recording on 2 separate occasions at least 2 weeks apart in 12 months before enrolment | AF documented by ECG evidence (e.g. 12-lead ECG, rhythm strip, Holter monitor, or pacemaker interrogation) within 30 days of randomisation plus medical evidence (e.g. from medical chart, hospital discharge summary) of atrial fibrillation within 1 year before and at least one day before the qualifying ECG evidence. Subjects with newly diagnosed AF are eligible permitting: there is evidence that the AF is non-valvular; cardioversion is not planned; and there is ECG evidence on 2 occasions 24 hours apart demonstrating AF |
| Risk factors                                                                                    | At least 1 of: history of stroke, transient ischemic attack, or systemic embolism; ejection fraction ≤40% documented by ECG, radionuclide, or contrast angiogram in the last 6 months; symptomatic heart failure, age ≥75 years; OR age at least 65 years with at least one of: diabetes mellitus on treatment; documented coronary artery disease (prior MI, positive stress test, positive nuclear perfusion study, prior CABG surgery or PCI, angiogram showing at least 75% stenosis in a major coronary artery); hypertension requiring medical treatment | At least one of: history of stroke, transient ischemic attack, or systemic embolism; symptomatic heart failure; ejection fraction ≤40% documented by ECG, radionuclide, or contrast angiogram; age ≥75 years; diabetes mellitus; hypertension requiring medical treatment | History of stroke, TIA, or non-CNS systemic embolism; OR at least 2 of: heart failure and/or left ventricular fraction ≤35%; hypertension defined by use of antihypertensive within 6 months of screening visit or systolic blood pressure ≥140 mm Hg or diastolic blood pressure ≥90 mm Hg*; age ≥75 years; diabetes mellitus defined as history of type 1 or type 2 diabetes mellitus or use of antidiabetic medications within 6 months of screening visit                                                                               |
| <b>Exclusion</b>                                                                                |                                                                                                                                                                                                                                                                                                                                                                                                                                                                                                                                                                |                                                                                                                                                                                                                                                                           |                                                                                                                                                                                                                                                                                                                                                                                                                                                                                                                                             |
| Reversible causes of AF                                                                         | Reversible causes of AF (e.g. cardiac surgery, pulmonary embolism, or untreated hyperparathyroidism)                                                                                                                                                                                                                                                                                                                                                                                                                                                           | Reversible causes of AF (e.g. thyrotoxicosis or pericarditis)                                                                                                                                                                                                             | Reversible causes of AF (i.e. thyrotoxicosis)                                                                                                                                                                                                                                                                                                                                                                                                                                                                                               |
| Mitral valve stenosis                                                                           | -                                                                                                                                                                                                                                                                                                                                                                                                                                                                                                                                                              | Clinically significant moderate or severe mitral valve stenosis                                                                                                                                                                                                           | Haemodynamically significant mitral valve stenosis                                                                                                                                                                                                                                                                                                                                                                                                                                                                                          |
| Heart valve disorders and conditions other than AF that require chronic anticoagulant treatment | History of heart valve disorder (e.g. prosthetic valve or haemodynamically relevant valve disease); anticoagulant treatment for disorders other than AF                                                                                                                                                                                                                                                                                                                                                                                                        | Prosthetic mechanical heart valve; anticoagulant treatment for disorders other than AF                                                                                                                                                                                    | Prosthetic heart valve; anticoagulant treatment for disorders other than AF                                                                                                                                                                                                                                                                                                                                                                                                                                                                 |
| Recent stroke or TIA                                                                            | Severe, disabling stroke within 6 months, or any stroke within 14 days                                                                                                                                                                                                                                                                                                                                                                                                                                                                                         | Stroke within 7 days                                                                                                                                                                                                                                                      | Severe, disabling stroke within 3 months or any stroke within 14 days; TIA within 3 days                                                                                                                                                                                                                                                                                                                                                                                                                                                    |
| Concomitant conditions associated with increased risk of bleeding                               | Major surgery within one month; planned surgery or intervention within next three months; history of intracranial, intraocular, spinal,                                                                                                                                                                                                                                                                                                                                                                                                                        | Planned major surgery; platelet count ≤100,000/mm <sup>3</sup> ; uncontrolled hypertension (systolic blood pressure ≥180 mmHg and/or diastolic blood                                                                                                                      | Active internal bleeding; major surgical procedure or trauma within 30 days of randomisation; clinically significant GI bleeding within                                                                                                                                                                                                                                                                                                                                                                                                     |



| Criterion type                         | RE-LY                                                                                                                                                                                                                                                                                                                                                                                                                       | ARISTOTLE                                                                                                                                                                          | ROCKET-AF                                                                                                                                                                                                                                                                                                                                                                                                                                                                                                                                                                                           |
|----------------------------------------|-----------------------------------------------------------------------------------------------------------------------------------------------------------------------------------------------------------------------------------------------------------------------------------------------------------------------------------------------------------------------------------------------------------------------------|------------------------------------------------------------------------------------------------------------------------------------------------------------------------------------|-----------------------------------------------------------------------------------------------------------------------------------------------------------------------------------------------------------------------------------------------------------------------------------------------------------------------------------------------------------------------------------------------------------------------------------------------------------------------------------------------------------------------------------------------------------------------------------------------------|
|                                        | retroperitoneal or atraumatic intra-articular bleeding; GI haemorrhage within the past year; symptomatic or endoscopically documented gastroduodenal ulcer disease in the previous 30 days; haemorrhagic disorder; uncontrolled hypertension (systolic blood pressure $\geq 180$ mmHg and/or diastolic blood pressure $\geq 100$ mmHg); malignancy or radiation therapy within 6 months and not expected to survive 3 years | pressure $\geq 100$ mmHg)                                                                                                                                                          | six months of randomisation; history of intracranial, intraocular, spinal, or intra-articular bleeding; chronic haemorrhagic disorder; known intracranial neoplasm, arteriovenous malformation or aneurysm; planned invasive procedure with potential for uncontrolled bleeding; platelet count $< 90,000/\mu\text{L}$ at screening; uncontrolled hypertension (systolic blood pressure $\geq 180$ mmHg and/or diastolic blood pressure $\geq 100$ mmHg); malignancy or radiation therapy within 6 months and not expected to survive three years                                                   |
| Planned AF ablation procedure          | Planned AF ablation procedure                                                                                                                                                                                                                                                                                                                                                                                               | Planned AF ablation procedure                                                                                                                                                      | -                                                                                                                                                                                                                                                                                                                                                                                                                                                                                                                                                                                                   |
| Planned cardioversion                  | -                                                                                                                                                                                                                                                                                                                                                                                                                           | -                                                                                                                                                                                  | Planned cardioversion                                                                                                                                                                                                                                                                                                                                                                                                                                                                                                                                                                               |
| Renal impairment                       | Creatine clearance $\leq 30$ mL/minute                                                                                                                                                                                                                                                                                                                                                                                      | Creatine clearance $< 25$ mL/minute or serum creatine $< 2.5$ mg/dL                                                                                                                | Creatine clearance $< 30$ mL/minute                                                                                                                                                                                                                                                                                                                                                                                                                                                                                                                                                                 |
| Contraindication to warfarin treatment | Contraindication to warfarin treatment                                                                                                                                                                                                                                                                                                                                                                                      | -                                                                                                                                                                                  | Contraindication to warfarin treatment<br>Treatment with $> 100$ mg ASA daily; ASA in combination with thienopyridines within 5 days of randomisation; intravenous antiplatelets within 5 days of randomisation; fibrinolytic agents within 10 days of randomisation; anticipated need for chronic treatment with NSAID; systemic treatment with a strong inhibitor of cytochrome P450 3A4 within 4 days of randomisation or anticipated treatment during study; systemic treatment with strong inducer of cytochrome P450 3A4 within 4 days of randomisation or anticipated treatment during study |
| Concomitant treatments                 | Fibrinolytic agents within 48 hours of study entry; investigational drug within 30 days                                                                                                                                                                                                                                                                                                                                     | Treatment with $> 165$ mg ASA daily; ASA in combination with thienopyridines; investigational drug within 30 days                                                                  | Left ventricular thrombus; HIV infection; anemia at screening visit; pregnancy or breastfeeding; TIA within 3 days of randomisation; active endocarditis; known liver disease (e.g. acute clinical hepatitis, chronic active hepatitis, cirrhosis) or ALT $> 3$ ULN; severe comorbid condition with life expectancy $\leq 2$ years; substance abuse within 3 years of randomisation; psychosocial disorder                                                                                                                                                                                          |
| Other concomitant conditions           | Active liver disease (e.g. persistent ALT, AST, or ALP $> 2$ ULN; active hepatitis C; active hepatitis B; or active hepatitis A); anemia; pregnancy; active infection endocarditis; substance abuse disorder; life expectancy less than duration of trial; other conditions not allowing safe participation                                                                                                                 | ALT or AST $> 2$ ULN; total bilirubin $> 1.5$ ULN; haemoglobin level $< 9$ g/dL; pregnancy; severe comorbid condition with life expectancy $\leq 1$ year; substance abuse disorder |                                                                                                                                                                                                                                                                                                                                                                                                                                                                                                                                                                                                     |
| INR monitoring                         | -                                                                                                                                                                                                                                                                                                                                                                                                                           | Inability to comply with INR monitoring                                                                                                                                            | -                                                                                                                                                                                                                                                                                                                                                                                                                                                                                                                                                                                                   |

Source: <sup>1-3</sup> with clarification from <sup>4-6</sup>

\*There is a contradiction between the hypertension criterion defined in the supplementary appendix to the primary ROCKET-AF publication<sup>4</sup> and the ROCKET-AF rationale and design publication published by the ROCKET-AF trial investigators.<sup>2</sup> In this instance, the criterion from the supplementary appendix to the primary ROCKET-AF publication was used as it was deemed

more inclusive than the ROCKET-AF rationale and design publication.

AF: Atrial Fibrillation; ALP: Alkaline Phosphatase; ALT: Alanine Transaminase; ASA: acetylsalicylic acid; AST: Aspartate Transaminase; CABG: Coronary Artery Bypass Graft; ECG: Echocardiogram; GI: Gastrointestinal; HIV: Human Immunodeficiency Virus; MI: Myocardial Infarction; NSAID: Non-Steroidal Anti-Inflammatory Drug; PCI: Percutaneous Coronary Intervention; Transient Ischemic Attack; ULN: Upper Limit of Normal

## References

- 1 Ezekowitz MD, Connolly S, Parekh A, et al. Rationale and design of RE-LY: randomized evaluation of long-term anticoagulant therapy, warfarin, compared with dabigatran. *Am Heart J* 2009;**157**:805-10, 810.
- 2 Patel M. Rivaroxaban once-daily, oral, direct factor Xa inhibition compared with vitamin K antagonism for prevention of stroke and embolism trial in atrial fibrillation: rationale and design of the ROCKET AF study. *Am Heart J* 2010;**159**:340-7.
- 3 Lopes RD, Alexander JH, Al-Khatib SM, et al. Apixaban for reduction in stroke and other thromboembolic events in atrial fibrillation (ARISTOTLE) trial: design and rationale. *Am Heart J* 2010;**159**:331-9.
- 4 Patel MR, Mahaffey KW, Garg J, et al. Rivaroxaban versus warfarin in nonvalvular atrial fibrillation (with supplementary appendix). *New Engl J Med* 2011;**365**:883-91.
- 5 Granger CB, Alexander JH, McMurray JJV, et al. Apixaban versus warfarin in patients with atrial fibrillation (with supplementary appendix and study protocol). *New Engl J Med* 2011;**365**:981-92.
- 6 Connolly SJ, Ezekowitz MD, Yusuf S, et al. Dabigatran versus warfarin in patients with atrial fibrillation (with supplementary appendix). *N Engl J Med* 2009;**361**:1139-51.



**Representativeness of the dabigatran, apixaban, and rivaroxaban clinical trial populations to real-world atrial fibrillation patients in the United Kingdom:  
A cross-sectional analysis using the General Practice Research Database**

|                                 |                                                                                                                |
|---------------------------------|----------------------------------------------------------------------------------------------------------------|
| Journal:                        | <i>BMJ Open</i>                                                                                                |
| Manuscript ID:                  | bmjopen-2012-001768.R1                                                                                         |
| Article Type:                   | Research                                                                                                       |
| Date Submitted by the Author:   | 20-Sep-2012                                                                                                    |
| Complete List of Authors:       | Lee, Sally<br>Monz, Brigitta; Boehringer Ingelheim,<br>Clemens, Andreas<br>Brueckmann, Martina<br>Lip, Gregory |
| <b>Primary Subject Heading</b>: | Cardiovascular medicine                                                                                        |
| Secondary Subject Heading:      | Cardiovascular medicine                                                                                        |
| Keywords:                       | Thromboembolism < CARDIOLOGY, Stroke < NEUROLOGY, Stroke medicine < INTERNAL MEDICINE                          |
|                                 |                                                                                                                |

SCHOLARONE™  
Manuscripts

1  
2  
3  
4  
5  
6  
7  
8  
9  
10  
11  
12  
13  
14  
15  
16  
17  
18  
19  
20  
21  
22  
23  
24  
25  
26  
27  
28  
29  
30  
31  
32  
33  
34  
35  
36  
37  
38  
39  
40  
41  
42  
43  
44  
45  
46  
47  
48  
49  
50  
51  
52  
53  
54  
55  
56  
57  
58  
59  
60

**Representativeness of the dabigatran, apixaban, and rivaroxaban clinical trial populations to real-world atrial fibrillation patients in the United Kingdom: A cross-sectional analysis using the General Practice Research Database**

Sally Lee, PhD<sup>1</sup>, Brigitta U Monz, MD<sup>2</sup>, Andreas Clemens, MD<sup>3</sup>, Martina Brueckmann, MD<sup>3</sup>, Gregory YH Lip, MD<sup>4</sup>

<sup>1</sup>Boehringer Ingelheim Ltd., UK

<sup>2</sup>Boehringer Ingelheim GmbH, Ingelheim, Germany

<sup>3</sup>Boehringer Ingelheim Pharma GmbH & Co. KG, Ingelheim, Germany

<sup>4</sup>University of Birmingham Centre for Cardiovascular Sciences, City Hospital Birmingham, UK

Corresponding Author:

Name: Dr. Brigitta Monz, MD, MPH, MA Ethics in Medicine

Address: Boehringer Ingelheim GmbH, Global Health Economics & Outcomes Research, Binger Str. 173, 55216 Ingelheim am Rhein, Germany

Email: [brigitta.monz@boehringer-ingelheim.com](mailto:brigitta.monz@boehringer-ingelheim.com)

Fax: +49 (6132) 77 6146

Telephone: +49 (6132) 7793362

KEYWORDS: apixaban – atrial fibrillation – dabigatran – generalisibility – rivaroxaban

WORD COUNT (excluding title page, abstract, references, and tables): 3990

1  
2  
3  
4 **Abstract** Word count: 287 words (maximum 300 words)  
5  
6

7 **Objective:** Three oral anticoagulants have reported study results for stroke prevention in patients  
8 with atrial fibrillation (AF) (dabigatran etexilate, rivaroxaban, apixaban); all demonstrated superiority  
9 or non-inferiority compared with warfarin (RE-LY, ARISTOTLE, ROCKET-AF). This study aimed to  
10 assess the representativeness of the results from RE-LY, ARISTOTLE, and ROCKET-AF to the real-  
11 world AF population, particularly the population eligible for anticoagulants, in the UK.  
12  
13  
14  
15

16  
17 **Design:** A cross-sectional database analysis was conducted.  
18  
19

20 **Setting:** A dataset derived from the General Practice Research Database (GPRD).  
21  
22

23 **Primary and secondary outcomes measure:** The proportion of real-world patients with AF who  
24 met the inclusion/exclusion criteria for RE-LY, ARISTOTLE, and ROCKET-AF were compared. The  
25 results were then stratified by risk of stroke using CHADS<sub>2</sub> and CHA<sub>2</sub>DS<sub>2</sub>-VASc.  
26  
27  
28  
29

30 **Results:** 83,898 patients with AF were identified in the GPRD. For the population at intermediate or  
31 high risk of stroke and eligible for anticoagulant treatment (CHA<sub>2</sub>DS<sub>2</sub>-VASc  $\geq 1$ ; n=78,783 [94%]), the  
32 proportion eligible for inclusion into RE-LY (dabigatran etexilate) was 68% (95% CI:67.7%-68.3%;  
33 n=53,640), compared with 65% (95% CI:64.7%-65.3%; n=51,163) eligible for ARISTOTLE  
34 (apixaban) and 51% (95% CI:50.7%-51.4%; n=39,892) eligible for ROCKET-AF (rivaroxaban). Using  
35 the CHADS<sub>2</sub> method of risk stratification, for the population at intermediate or high risk of stroke and  
36 eligible for anticoagulation treatment (CHADS<sub>2</sub>  $\geq 1$ ; n=71,493 [85%]), the proportion eligible for  
37 inclusion into RE-LY was 74% (95% CI:73.7%-74.3%; n=52,783), compared with 72% (95%  
38 CI:71.7%-72.3%; n=51,415) for ARISTOTLE and 56% (95% CI:55.6%-56.4%; n=39,892) for  
39 ROCKET-AF.  
40  
41  
42  
43  
44  
45  
46  
47  
48

49  
50 **Conclusions:** Patients enrolled within RE-LY and ARISTOTLE were more reflective of the 'real-world'  
51 AF population in the UK, in contrast to patients enrolled within ROCKET-AF who were a more  
52 narrowly-defined group of patients at higher risk of stroke. Differences between trials should be taken  
53 into account when considering the applicability of clinical trial findings.  
54  
55  
56  
57  
58  
59  
60

## Article summary

### Article focus

- The focus of this study was to assess the applicability of the findings of three randomised, controlled trials for stroke prevention in patients with atrial fibrillation (AF) to the real-world UK population of individuals with this condition, particularly to patients who would be eligible for anticoagulation under current guidelines.
- The three studies were RE-LY, ARISTOTLE and ROCKET-AF that investigated the efficacy and safety of dabigatran etexilate (dabigatran), apixaban and rivaroxaban compared to warfarin, respectively.

### Key messages

- Patients enrolled in RE-LY and ARISTOTLE were more reflective than patients enrolled in ROCKET-AF with respect to the real-world AF population in the UK, including the population eligible for anticoagulation.
- About 2/3 of patients recommended for anticoagulation would have been eligible to enrol into the clinical study investigating dabigatran (68%) or apixaban (65%) , but only about half of the patients would have been eligible for the rivaroxaban study (51%).
- Differences in representativeness should be taken into account when transferring study findings to patient populations in routine care.

### Strengths and limitations of this study

- The source population for this research, i.e. the General Practice Research Database (GPRD) is the largest primary care database in the world, containing the records of a representative sample of the British population.

- Operationalisation of the inclusion and exclusion criteria of the clinical studies in order to assess the eligibility for study enrolment of patients seen in routine care required in some instances assumptions.
- AF diagnosis in the GPRD may not always be accurate. However, the majority of AF cases were correctly coded according to a recent systematic review, and any errors would not be expected to systematically bias the findings of this research in favour of one study.

For peer review only

## Background

Atrial fibrillation (AF) is the most common sustained cardiac arrhythmia, and is associated with an increased risk of stroke and other thromboembolic events. Approximately one in five of all strokes are caused by AF,<sup>1</sup> with the risk of stroke increased by four- to five-fold in patients with AF compared with the general population.<sup>2</sup> The condition is often asymptomatic,<sup>3</sup> but mortality in patients with chronic AF has been reported to be up to 2.5 times higher than in the general population, with the relative risk of death higher in women than in men.<sup>4</sup> The economic burden of AF is also high, with a key cost-driver being hospitalisation. This economic burden of AF has increased significantly over the last few decades, and is expected to increase even more in future due to aging populations.<sup>5</sup>

Oral anticoagulants form the current standard of care for patients with AF considered at intermediate to high risk of stroke, and are effective therapies for stroke prevention.<sup>1,3,6</sup> For many decades, warfarin was the only anticoagulant available; for now, three novel oral anticoagulant agents (dabigatran etexilate [later referred to as dabigatran], apixaban, and rivaroxaban) have demonstrated superiority or non-inferiority to warfarin with respect to the primary efficacy outcome of stroke or systemic embolism in Phase III randomised controlled trials.<sup>7-9</sup>

In RE-LY (n=18,113; ITT population), dabigatran at a dose of 150 mg twice daily was associated with a lower rate of stroke or systemic embolism (Relative Risk [RR], 95% Confidence Interval [CI]: 0.65, 0.52-0.81; p<0.001 for superiority) and did not significantly increase major bleeding (RR, 95% CI: 0.93, 0.81-1.07; p=0.32) when compared with warfarin. At a lower dose (110 mg, twice daily), dabigatran was associated with rates of stroke or systemic embolism that were similar to warfarin (RR, 95% CI: 0.90, 0.74-1.10; p<0.001 for non-inferiority) but significantly reduced major bleeding compared with warfarin (RR, 95% CI: 0.80, 0.70-0.93; p=0.003).<sup>7,10</sup> In ARISTOTLE (n=18,201; ITT population), apixaban (5 mg, twice daily) was associated with a lower rate of stroke or systemic embolism (Hazard Ratio [HR], 95% CI: 0.79, 0.66-0.95; p<0.001 for non-inferiority; p=0.01 for superiority) and reduced rates of major bleeding (HR, 95% CI: 0.69, 0.60-0.80; p<0.001) when compared with warfarin.<sup>9</sup> In ROCKET-AF (n=14,171; ITT population), rivaroxaban (20 mg, once daily) was associated with a similar rate of stroke or systemic embolism compared with warfarin (HR, 95%



1  
2  
3 CI: 0.88, 0.75-1.03;  $p < 0.001$  for non-inferiority,  $p = 0.12$  for superiority; ITT population) with no  
4 significant improvement in the rate of major bleeding (HR, 95% CI: 1.04, 0.90-1.20;  $p = 0.58$ , safety  
5 on treatment population).<sup>8</sup> Of these three anticoagulants, only dabigatran and rivaroxaban are  
6 currently approved in Europe for stroke prevention in patients with AF.<sup>11,12</sup>  
7  
8  
9

10  
11 Although these three RCTs have demonstrated that the three new anticoagulants are superior or non-  
12 inferior to warfarin in terms of stroke prevention, these studies applied specific inclusion and  
13 exclusion criteria that may have excluded patients who would otherwise be treated in real-life clinical  
14 practice, currently with warfarin. Therefore it is unknown whether the patient populations included in  
15 RE-LY, ARISTOTLE, and ROCKET-AF reflect 'real-world' patients with AF, and therefore whether the  
16 study results can be generalised to the wider patient population.  
17  
18  
19  
20  
21  
22

23  
24 To date there have been no studies comparing the eligibility criteria of these three trials. This study  
25 (RADAR: Representativeness and generalisability of the dabigatran, apixaban, and rivaroxaban clinical  
26 trial populations to real-world AF patients in the United Kingdom) aimed to assess the differences  
27 between the three trial populations of RE-LY, ARISTOTLE, and ROCKET-AF and the real-world  
28 patients with AF recorded within the General Practice Research Database (GPRD) in the United  
29 Kingdom (UK). An analysis on patients at intermediate- or high- risk of stroke allowed a focus on  
30 patients for whom, according to current clinical guidelines,<sup>1,3,6,13-15</sup> an anticoagulant could be  
31 prescribed. Risk of stroke is commonly assessed using stroke risk scores, such as the CHADS<sub>2</sub> score.<sup>16</sup>  
32 The CHA<sub>2</sub>DS<sub>2</sub>-VASc score has also been introduced and, based on multiple validation studies, is more  
33 accurate in identifying truly low-risk patients who do not require anticoagulation therapy and is at  
34 least as good as (possibly superior to) CHADS<sub>2</sub> in identifying high-risk patients who develop  
35 thrombembolism.<sup>16</sup> Both CHADS<sub>2</sub> and CHA<sub>2</sub>DS<sub>2</sub>-VASc scores were used to stratify patients in the  
36 current study. The CHA<sub>2</sub>DS<sub>2</sub>-VASc scoring became available after the three clinical studies had been  
37 initiated.  
38  
39  
40  
41  
42  
43  
44  
45  
46  
47  
48  
49  
50

51  
52 It was hypothesised that the trial populations within RE-LY, ROCKET-AF, and ARISTOTLE, as selected  
53 by the trial protocol inclusion and exclusion criteria, would vary in their representativeness to real-  
54 world AF populations, particularly for those eligible for anticoagulant treatment based on current  
55  
56  
57  
58  
59  
60

1  
2  
3  
4  
5  
6  
7  
8  
9  
10  
11  
12  
13  
14  
15  
16  
17  
18  
19  
20  
21  
22  
23  
24  
25  
26  
27  
28  
29  
30  
31  
32  
33  
34  
35  
36  
37  
38  
39  
40  
41  
42  
43  
44  
45  
46  
47  
48  
49  
50  
51  
52  
53  
54  
55  
56  
57  
58  
59  
60

guidelines.

For peer review only

## Design

### Objectives

The objective of this study was to assess the representativeness of RE-LY, ARISTOTLE, and ROCKET-AF to the real-world AF population in the UK. The study design was a cross-sectional database analysis.

### Data source

The GPRD was used as a source of information on the general AF population. In the UK, patients are semi-permanently registered at a specific practice where General Practitioners (GPs) provide primary care and make specialist referrals. These practices centralize the medical information from the GPs themselves, and also information from the specialist referrals and hospitalisations.<sup>17</sup> The GPRD is a computerised database comprising anonymous medical records from over 630 practices in the UK, covering approximately 8% of the UK population.<sup>18</sup> The database contains longitudinal data on patient demographics, diagnoses, referrals, prescribing, and health outcomes and has a geographical distribution that is representative of the UK population.<sup>19</sup> The median proportion of diagnoses correctly coded by the GPRD was recently demonstrated to be 89% (range 24% to 100%) in a systematic literature review of GPRD studies.<sup>20</sup> The GPRD has obtained ethical approval from a Multicentre Research Ethics Committee for all purely observational research using GPRD data; specifically, studies which do not include patient involvement.<sup>21</sup>

### Population

Patients from the GPRD were included if they had a diagnosis of non-valvular AF, were still alive and registered with a GP practice on the 31<sup>st</sup> March 2008, and were aged  $\geq 18$  years of age. An artificial start date was defined for 31<sup>st</sup> March 2008 to allow sufficient time for the application of prospective exclusion criteria, such as 'clinically significant GI bleeding within six months of randomisation'.

### Inclusion/exclusion criteria

The inclusion/exclusion criteria from RE-LY, ROCKET-AF, and ARISTOTLE were derived primarily from the trial design and rationale publications,<sup>22-24</sup> with clarification sought from supplementary appendices and primary clinical trial result publications<sup>7-9</sup> where required. A full description of the inclusion and exclusion criteria applied is provided in the Supplementary Material. Of note, the ROCKET-AF trial required patients to have a history of stroke, TIA, or systemic embolism (i.e. secondary prevention cohort) or had to have *two* of the following: age  $\geq 75$  years, congestive heart failure or ejection fraction  $\leq 35\%$ , diabetes, or hypertension.

With respect to the ROCKET-AF trial, there was a contradiction between the hypertension risk factor inclusion criterion described in the ROCKET-AF rationale and design publication (systolic blood pressure  $\geq 180$  mmHg or diastolic blood pressure  $\geq 100$  mmHg)<sup>22</sup> and in the supplementary appendix of the results publication (use of antihypertensives within 6 months before screening or persistent systolic blood pressure  $> 140$  mmHg or persistent diastolic blood pressure  $> 90$  mmHg)<sup>8</sup>. In the current analysis the more inclusive criterion from the supplementary appendix has been used in place of the trial design publication.

The inclusion/exclusion criteria were then used to identify the total number of patients with AF in the GPRD who would meet the trial eligibility criteria. READ codes were used as the principal method of identifying patients from the GPRD who would meet the trial inclusion/exclusion criteria. READ codes are a coded thesaurus of clinical terms and form the basic means through which physicians record patient findings and interventions in health and social care IT systems within the UK.<sup>25</sup> Prescription data were also used to identify patients prescribed medications that may have affected their eligibility for one or more of the trials (e.g. long term non-steroidal anti-inflammatory drug usage), and test results were used to identify patients meeting criterion (e.g. abnormal platelet and haemoglobin levels) forming part of the exclusion criteria for the trials.

The CHADS<sub>2</sub> and CHA<sub>2</sub>DS<sub>2</sub>-VASc scores were then used to stratify patients from the GPRD by risk of stroke (low, medium, and high). CHADS<sub>2</sub> assigns one point to patients for chronic heart failure, hypertension, age  $\geq 75$  years, and/or diabetes, and two points for history of stroke or transient

1  
2  
3 ischemic attack (TIA). A score of 1 indicates an intermediate risk of stroke, a score of  $\geq 2$  indicates a  
4 high risk of stroke.<sup>3</sup> In contrast, CHA<sub>2</sub>DS<sub>2</sub>-VASc assigns one point for congestive heart failure,  
5 hypertension, diabetes, vascular disease, female gender, and/or age 65-74 years, and two points for  
6 history of stroke or TIA and/or age  $\geq 75$  years.<sup>16</sup> As with CHADS<sub>2</sub>, a score of 1 on the CHA<sub>2</sub>DS<sub>2</sub>-VASc  
7 indicates an intermediate risk of stroke, and a score of  $\geq 2$  indicates a high risk of stroke.<sup>16</sup>  
8  
9  
10  
11  
12

### 13 **Outcomes**

14  
15  
16 The outcomes of interest were the proportion of real-world patients with AF in the GPRD who would  
17 meet the inclusion/exclusion criteria for each of the three trials (RE-LY, ARISTOTLE, and ROCKET-AF),  
18 as well as the proportion of real-world patients with AF classified at intermediate or high risk of stroke  
19 who would meet the respective inclusion/exclusion criteria, stratified by the risk of stroke according to  
20 both the CHADS<sub>2</sub> and the CHA<sub>2</sub>DS<sub>2</sub>-VASc. The specific inclusion and exclusion criteria for each of the  
21 three trials were also examined to determine if there were key criteria causing differences between  
22 trials.  
23  
24  
25  
26  
27  
28  
29  
30

### 31 **Statistical Analysis**

32  
33  
34 The proportion of patients from the GPRD who would be eligible for RE-LY was compared with the  
35 proportion that would be eligible for ARISTOTLE and ROCKET-AF using the Chi-squared test at a  
36 significance level of 5%. All analyses are descriptive and exploratory.  
37  
38  
39  
40  
41  
42  
43  
44  
45  
46  
47  
48  
49  
50  
51  
52  
53  
54  
55  
56  
57  
58  
59  
60

## Results

### Patients eligible for RE-LY, ARISTOTLE, and ROCKET-AF

In total, 83,898 patients with AF were identified from the GPRD (Table 1). Of these patients, 64% met the inclusion/exclusion criteria for enrolment into RE-LY. This compares with 61% of patients who were eligible for inclusion into ARISTOTLE and 48% of patients who were eligible for inclusion into ROCKET-AF. The proportion of real-world patients who would be eligible for inclusion within the RE-LY trial was statistically significantly higher than the proportion of real-world patients who would be eligible for ARISTOTLE or ROCKET-AF ( $p < 0.001$  for both comparisons), though the small difference against ARISTOTLE is probably not clinically meaningful.

### Intermediate- and high-risk patients eligible for RE-LY, ARISTOTLE, and ROCKET-AF

In clinical practice, only patients considered at intermediate or high risk of stroke would receive anticoagulation therapy. Using the CHADS<sub>2</sub> score, 71,493 (85%) patients from the total GPRD AF population would be eligible for anticoagulant therapy, of which 74% would meet the RE-LY inclusion/exclusion criteria, 72% would meet the ARISTOTLE criteria, and 56% would meet the ROCKET-AF criteria (Table 1). Using the CHA<sub>2</sub>DS<sub>2</sub>-VASc score, 78,783 (94%) patients from the total GPRD population would be eligible for anticoagulant therapy, of which 68% would meet the RE-LY inclusion/exclusion criteria, 65% would meet the ARISTOTLE criteria, and 51% would meet the ROCKET-AF criteria (Table 1).

### Eligibility by individual inclusion and exclusion criterion

The inclusion rather than exclusion criteria were the primary determinants for the trial population in RE-LY (77% of GPRD AF population eligible), ARISTOTLE (81% of GPRD AF population eligible), and ROCKET-AF (63% of GPRD AF population eligible), as would be expected (Table 2). Within the inclusion criteria, the greatest difference between trials was seen with the hypertension definition, where 81% of the GPRD AF population met this criterion in ROCKET-AF, compared to 59% of real-world patients for the RE-LY and ARISTOTLE hypertension criteria (Table 2). This difference, which favours ROCKET-AF over RE-LY and ARISTOTLE with respect to inclusivity, did not appear to be a

1  
2  
3 major driver for differences in overall inclusion eligibility for the trials. Instead, the differences in  
4 inclusion eligibility were not driven by an individual inclusion criterion, but by the different  
5 combinations of individual inclusion criteria within the trials.  
6  
7

8  
9  
10 For the exclusion criteria specifically, the requirement for anticoagulant treatment for conditions other  
11 than AF excluded 6% of GPRD patients with AF from all trials, with renal impairment excluding a  
12 further 3% of the GPRD AF population. Although the exclusion criteria differed between trials, none of  
13 the individual criteria appear to be a key driver of the different proportions of real-world patients  
14 eligible for the trials (Table 2).  
15  
16  
17  
18  
19  
20  
21  
22  
23  
24  
25  
26  
27  
28  
29  
30  
31  
32  
33  
34  
35  
36  
37  
38  
39  
40  
41  
42  
43  
44  
45  
46  
47  
48  
49  
50  
51  
52  
53  
54  
55  
56  
57  
58  
59  
60

## Discussion

The results of this analysis demonstrate that the warfarin-controlled pivotal trials for the novel oral anticoagulants dabigatran (RE-LY), apixaban (ARISTOTLE), and rivaroxaban (ROCKET-AF) vary in their representativeness of the AF population enrolled. Based on GPRD, the RE-LY trial enrolled a patient population that is most closely matched to patients with AF seen in general practice within the UK compared to the populations enrolled according to the exclusion/inclusion criteria for the other trials. Overall, 68% of intermediate- or high-risk patients with AF captured within the GPRD would be eligible for inclusion into RE-LY, as compared with 65% and 51% for ARISTOTLE and ROCKET-AF respectively (as categorised by  $\text{CHA}_2\text{DS}_2\text{-VASc} \geq 1$ ). Being more inclusive and representative of the general AF population allows trial findings to be more readily generalised to patients seen in everyday clinical practice (and eligible for anticoagulant therapy). The RE-LY patient population is also slightly more inclusive of AF patients eligible for anticoagulant treatment, than the population in the ARISTOTLE trial (difference of 3%;  $p < 0.001$ ) but this statistically significant difference between the RE-LY and ARISTOTLE populations would not necessarily translate into clinically meaningful differences for the real-world population.

It is important to note that a higher risk patient population was intentionally enrolled in ROCKET-AF (mean  $\text{CHADS}_2$  risk score of 3.48) compared with both the RE-LY (mean  $\text{CHADS}_2$  risk score of 2.1) and ARISTOTLE (mean  $\text{CHADS}_2$  risk score of 2.2) trials, and thus, a large number of patients who would be eligible for anticoagulant treatment under current guidelines would not have been entered into ROCKET-AF. Indeed, there are no data for patients with a  $\text{CHADS}_2$  score 0-1 in ROCKET-AF, and only 13% of this trial population had a  $\text{CHADS}_2$  score of 2.<sup>8</sup> A significant number of patients who could be eligible for anticoagulation in general practice (intermediate or high risk of stroke according to the  $\text{CHADS}_2$  risk score) and who would be included within RE-LY are excluded from ROCKET-AF (18%). In total, 13,748 patients with AF eligible for the RE-LY study would have been excluded from the ROCKET-AF trial within the total GPRD AF population (low, intermediate, or high risk of stroke). Thus, some care should be taken when generalizing the trial results from the high risk subpopulation seen in ROCKET-AF to the general AF population encountered in clinical practice.



1  
2  
3 Trial generalisability (external validity) is a recognised problem in randomised controlled trials. The  
4 trial participants enrolled in a trial may differ considerably from the target population/clinical practice  
5 in which the trial's findings are later used, and trial eligibility criteria can contribute to this lack of  
6 generalisability.<sup>26</sup> The current analysis indicates that the rate of inclusion observed within the RE-LY  
7 trial (and probably, ARISTOTLE) is at least as representative of the general population as other  
8 pivotal trials have been found to be. For example, a recent analysis of patients enrolled in eight  
9 placebo controlled clinical trials for amyotrophic lateral sclerosis (ALS) found that 66% of patients  
10 diagnosed with ALS in Italy between 2003 and 2008 met the eligibility criteria for the trials.<sup>27</sup>  
11 However, this analysis reported that the ALS patients enrolled within the clinical trials were  
12 demographically and clinically different from the patients within the national ALS population, with the  
13 differences between the trial cohorts and patient population resulting in part from the different  
14 eligibility criteria used and in part from factors unrelated to enrolment criteria. With respect to risk of  
15 stroke as determined by CHADS<sub>2</sub> score, 26% of individuals in a study of the incidence and prevalence  
16 of chronic AF in the UK (using also the GPRD as a data source), had a CHADS<sub>2</sub> score of  $\geq 3$ ,<sup>17</sup>  
17 compared with 33% in RE-LY,<sup>7</sup> 32% in ARISTOTLE,<sup>9</sup> and 87% in ROCKET-AF.<sup>8</sup> This demonstrates  
18 that both RE-LY and ARISTOTLE were substantially more reflective of the real-world AF population  
19 (based on the GPRD) than ROCKET-AF when considering the proportion of the population at differing  
20 risk of stroke. It is interesting to note that little research has actually been conducted to quantify the  
21 representativeness of trial populations with regards to real life populations. This is surprising given  
22 that the external validity of trials is always questioned, especially in the context of reimbursement  
23 decisions and Health Technology Assessments (HTA). More systematic research in this area appears  
24 to be warranted, particularly with respect to how the external validity of a trial then affects the  
25 'translation' of efficacy to effectiveness.  
26  
27  
28  
29  
30  
31  
32  
33  
34  
35  
36  
37  
38  
39  
40  
41  
42  
43  
44  
45  
46  
47

48  
49 When classifying patient risk, risk groups stratified by the CHA<sub>2</sub>DS<sub>2</sub>-VASc score may be considered to  
50 be more accurate than those stratified by CHADS<sub>2</sub>, particularly to identify 'truly low risk' patients who  
51 do not need any antithrombotic therapy, due to the more inclusive nature of common stroke risk  
52 factors in CHA<sub>2</sub>DS<sub>2</sub>-VASc.<sup>16</sup> This is important when considering the results of the current study, since  
53 the intermediate or high risk population by CHA<sub>2</sub>DS<sub>2</sub>-VASc included 7,290 more patients than did the  
54  
55  
56  
57  
58  
59  
60

1  
2  
3 intermediate or high risk population by CHADS<sub>2</sub>. These patients are at risk of stroke but may not  
4 receive treatment if miscategorised as low risk by the CHADS<sub>2</sub> score; indeed, one recent analysis  
5 suggests that a CHADS<sub>2</sub> score=0 is not low risk with stroke rates that can range between 0.8% per  
6 year to 3.2% per year when subdivided by CHA<sub>2</sub>DS<sub>2</sub>-VASc score.<sup>28</sup> The 2010 ESC guidelines suggest  
7 that although CHADS<sub>2</sub> is useful as a simple initial means of assessing risk, patients scoring 0 or 1  
8 should undergo more comprehensive assessment, for example with CHA<sub>2</sub>DS<sub>2</sub>-VASc.<sup>1</sup> In the 2012  
9 focussed update of the ESC guidelines, the only recommended stroke risk score is CHA<sub>2</sub>DS<sub>2</sub>-VASc,  
10 with the initial focus on identification 'truly low risk' patients (that is, age <65 and lone AF, or  
11 CHA<sub>2</sub>DS<sub>2</sub>-VASc=0) who do not need any antithrombotic therapy. Those with ≥1 stroke risk factors  
12 can be offered effective stroke prevention, which is oral anticoagulation.<sup>29</sup>

### 23 24 25 26 **Limitations**

27  
28  
29 It should be noted that a number of the criteria included in the trial design for RE-LY, ARISTOTLE,  
30 and ROCKET-AF were not recorded in the GPRD or were difficult to extract. For example, planned  
31 major surgery would not be captured within the database, nor would a life expectancy of less than 1  
32 year, both of which are exclusion criteria in one or more of the trials. However, these criteria were  
33 likely to have had minimal impact on the final populations included within the RCTs, since many of  
34 the criteria that could not be applied to the GPRD population were consistent across all three trials.  
35 This means that the impact of applying the individual criterion would be the same across RE-LY,  
36 ARISTOTLE, and ROCKET-AF, with only the order of magnitude affected. A potential limitation of the  
37 current study is that the analyses were reliant on the quality of GP coding in the GPRD dataset. A  
38 recent systematic review of the validity of diagnostic coding in the GPRD reported that >80% of  
39 events such as myocardial infarction and stroke were correctly coded, but a lower proportion (64.4%)  
40 of AF cases were correctly coded.<sup>30</sup> This means that there may be some error in the characteristics of  
41 the GPRD population taken to be a reflection of the general AF population in the UK. However, this is  
42 unlikely to affect the conclusion drawn from the current study, since the errors in coding are unlikely  
43 to be focused on a specific subgroup of patients and instead would be expected to be distributed

1  
2  
3 across the whole AF population in the UK. Although the total number of patients classified as having  
4 AF in the GPRD may be lower than the total number of patients with AF in the UK, there is no reason  
5 to suspect that the patients miscoded would have systematically differed in characteristics to those  
6 correctly coded within the database.  
7  
8  
9

10  
11  
12  
13 In order to answer the question of generalisability, it would be necessary to compare clinical trial  
14 results with effectiveness and safety findings observed in routine care. However, to undertake such  
15 real-life assessments typically takes several years as the drugs in question need to become used  
16 widely. Therefore, Health Technology Assessment (HTA) bodies (such as NICE in the UK) often  
17 request that evidence is presented to what extent a trial population is reflective of the population for  
18 which the coverage decision has to be taken and for which the drug is likely to be used in routine  
19 practice. If a study population is very different from the one for which the drug will be used in routine  
20 care, this will increase the uncertainty in such HTA decisions. Such assessment as ours therefore can  
21 serve as a first indication of generalisability. A further limitation is that other study factors that can  
22 influence generalisability have not been investigated in this research, such as the countries  
23 participating in the studies or the quality of the warfarin arm as an indicator for the quality of patient  
24 care<sup>31</sup>.  
25  
26  
27  
28  
29  
30  
31  
32  
33  
34  
35  
36  
37

## 38 **Conclusion**

39  
40  
41 Trial generalisability is an important consideration for the National Institute of Health and Clinical  
42 Excellence (NICE) in the UK and other such HTA bodies, with past criticisms focusing on the lack of  
43 generalisability of trials as a result of the eligibility criteria applied.<sup>32-34</sup> The current analysis  
44 demonstrates that the data from RE-LY and ARISTOTLE are applicable to a larger proportion of real-  
45 world AF patients than data from ROCKET-AF, meaning that the results from the study supporting the  
46 use of dabigatran and apixaban are more generalizable to the general anticoagulant eligible AF  
47 population.  
48  
49  
50  
51  
52  
53  
54  
55  
56  
57  
58  
59  
60

## Acknowledgements

With thanks to James Cann and Ebony Samuels at HERON Evidence Development for contributing to the preparation of the initial draft manuscript.

## Funding source

The study was funded by Boehringer Ingelheim International GmbH.

## Author contributions

SL was responsible for study design, data extraction, and statistical analysis; BM, AC, MB, and GL contributed to study concept, design, and data interpretation. All authors reviewed and significantly contributed to the initial draft manuscript and approved the final submitted version.

## Conflict of interest

SL, BM, AC, and MB are employees of Boehringer Ingelheim, the manufacturer of dabigatran. GYHL has served as a consultant for Bayer, Astellas, Merck, Sanofi, BMS/Pfizer, Daiichi-Sankyo, Biotronik, Portola and Boehringer Ingelheim and has been on the speakers' bureau for Bayer, BMS/Pfizer, Boehringer Ingelheim, and Sanofi Aventis.

## References

- 1 Camm AJ, Kirchhof P, Lip GYH, et al. Guidelines for the management of atrial fibrillation: the Task Force for the Management of Atrial Fibrillation of the European Society of Cardiology. *Eur Heart J* 2010;**31**:2369-429.
- 2 Wolf PA, Abbott RD, Kannel WB. Atrial fibrillation as an independent risk factor for stroke: the Framingham Study. *Stroke* 1991;**22**:983-8.
- 3 National Collaborating Centre for Chronic Conditions. Atrial fibrillation: national clinical guidelines for management in primary and secondary care. London: Royal College of Physicians; 2006.
- 4 Ruigomez A, Johansson S, Wallander MA, et al. Risk of mortality in a cohort of patients newly diagnosed with chronic atrial fibrillation. *BMC Cardiovasc Disord* 2002;**2**:5.
- 5 Wolowacz SE, Samuel M, Brennan VK, et al. The cost of illness of atrial fibrillation: a systematic review of the recent literature. *Europace* 2011;**13**:1375-85.
- 6 Fuster V, Ryden LE, Cannom DS, et al. ACC/AHA/ESC 2006 Guidelines for the management of patients with atrial fibrillation: a report of the American College of Cardiology/American Heart Association Task Force on Practice Guidelines and the European Society of Cardiology Committee for Practice Guidelines (Writing Committee to Revise the 2001 Guidelines for the Management of Patients With Atrial Fibrillation). *Circulation* 2006;**114**:e257-e354.
- 7 Connolly SJ, Ezekowitz MD, Yusuf S, et al. Dabigatran versus warfarin in patients with atrial fibrillation (with supplementary appendix). *N Engl J Med* 2009;**361**:1139-51.
- 8 Patel MR, Mahaffey KW, Garg J, et al. Rivaroxaban versus warfarin in nonvalvular atrial fibrillation (with supplementary appendix). *New Engl J Med* 2011;**365**:883-91.
- 9 Granger CB, Alexander JH, McMurray JJV, et al. Apixaban versus warfarin in patients with atrial fibrillation (including supplementary appendix and study protocol). *New Engl J Med* 2011;**365**:981-92.
- 10 Connolly SJ, Ezekowitz MD, Yusuf S, et al. Newly identified events in the RE-LY trial. *New Engl J Med* 2010;**363**:1875-6.
- 11 Boehringer Ingelheim. Pradaxa 150 mg: summary of product characteristics. emc 2011 August 18 [cited 2011 Nov 8];Available from: URL: <http://www.medicines.org.uk/EMC/medicine/24839/SPC/Pradaxa+150+mg+hard+capsules/>
- 12 Bayer plc. Xarelto 20mg film-coated tablets. emc 2011 [cited 2012 Feb 13];Available from: URL: <http://www.medicines.org.uk/EMC/medicine/25586/SPC/Xarelto+20mg+film-coated+tablets/>
- 13 Wann LS, Curtis AB, Ellenbogen KA, et al. 2011 ACCF/AHA/HRS focused update on the management of patients with atrial fibrillation (update on dabigatran). A report of the American College of Cardiology Foundation/American Heart Association Task Force on Practice Guidelines. *Heart Rhythm* 2011;**8**:e1-e8.

- 1  
2  
3 14 You JJ, Singer DE, Howard PA, et al. Antithrombotic therapy for atrial fibrillation: Antithrombotic  
4 Therapy and Prevention of Thrombosis, 9th ed: American College of Chest Physicians Evidence-  
5 Based Clinical Practice Guidelines. *Chest* 2012;**141**:e531S-e575S.
- 6  
7 15 Skanes AC, Healey JS, Cairns JA, et al. Focused 2012 update of the Canadian Cardiovascular  
8 Society atrial fibrillation guidelines: recommendations for stroke prevention and rate/rhythm  
9 control. *Can J Cardiol* 2012;**28**:125-36.
- 10  
11 16 Lip GYH, Nieuwlaat R, Pisters R, et al. Refining clinical risk stratification for predicting stroke  
12 and thromboembolism in atrial fibrillation using a novel risk factor-based approach: the Euro  
13 heart survey on atrial fibrillation. *Chest* 2010;**137**:263-72.
- 14  
15 17 Rietbrock S, Heeley E, Plumb J, et al. Chronic atrial fibrillation: incidence, prevalence, and  
16 prediction of stroke using the Congestive heart failure, Hypertension, Age >75, Diabetes  
17 mellitus, and prior Stroke or transient ischemic attack (CHADS2) risk stratification scheme. *Am*  
18 *Heart J* 2008;**156**:57-64.
- 19  
20 18 General Practice Research Database. The database. Medicines and Healthcare products  
21 Regulatory Agency 2011 [cited 2011 Nov 2];Available from: URL:  
22 <http://www.gprd.com/products/database.asp>
- 23  
24 19 Garcia Rodriguez LA, Perez Gutthann S. Use of the UK General Practice Research Database for  
25 pharmacoepidemiology. *Br J Clin Pharmacology* 1998;**45**:419-25.
- 26  
27 20 Herrett E, Thomas SL, Schoonen WM, et al. Validation and validity of diagnoses in the General  
28 Practice Research Database: a systematic review. *Br J Clin Pharmacology* 2010;**69**:4-14.
- 29  
30 21 General Practice Research Database. Ethical review for GPRD protocols. Medicines and  
31 Healthcare products Regulatory Agency 2012 [cited 2012 Jan 26];Available from: URL:  
32 <http://www.gprd.com/isac/#ethicalReview>
- 33  
34 22 Patel M. Rivaroxaban once-daily, oral, direct factor Xa inhibition compared with vitamin K  
35 antagonism for prevention of stroke and embolism trial in atrial fibrillation: rationale and design  
36 of the ROCKET AF study. *Am Heart J* 2010;**159**:340-7.
- 37  
38 23 Lopes RD, Alexander JH, Al-Khatib SM, et al. Apixaban for reduction in stroke and other  
39 thromboembolic events in atrial fibrillation (ARISTOTLE) trial: design and rationale. *Am Heart J*  
40 2010;**159**:331-9.
- 41  
42 24 Ezekowitz MD, Connolly S, Parekh A, et al. Rationale and design of RE-LY: randomized  
43 evaluation of long-term anticoagulant therapy, warfarin, compared with dabigatran. *Am Heart J*  
44 2009;**157**:805-10, 810.
- 45  
46 25 National Health Service. READ codes. NHS Connecting for Health 2011 [cited 2011 Dec  
47 14];Available from: URL:  
48 <http://www.connectingforhealth.nhs.uk/systemsandservices/data/uktc/readcodes>
- 49  
50 26 Weiss NS, Koepsell TD, Psaty BM. Generalizability of the results of randomized trials. *Arch*  
51 *Intern Med* 2008;**168**:133-5.
- 52  
53  
54  
55  
56  
57  
58  
59  
60

- 1  
2  
3 27 Chio A, Canosa A, Gallo S, et al. ALS clinical trials: do enrolled patients accurately represent the  
4 ALS population? *Neurology* 2011;**77**:1432-7.  
5  
6 28 Olesen JB, Torp-Pedersen C, Hansen ML, et al. The value of the CHA2DS2-VASc score for  
7 refining stroke risk stratification in patients with atrial fibrillation with a CHADS2 score 0-1: A  
8 nationwide cohort study. *Thromb Haemost* 2012;**107**:1172-9.  
9  
10 29 Camm AJ, Lip GYH, De Caterina R, et al. 2012 focused update of the ESC Guidelines  
11 for the management of atrial fibrillation. An update of the 2010 ESC Guidelines for the  
12 management of atrial fibrillation. *Eur Heart J*. 2012 Aug 24. [Epub ahead of print]  
13  
14 30 Khan N, Harrison S, Rose P. Validity of diagnostic coding within the General Practice Research  
15 Database: a systematic review. *Br J Gen Pract* 2011;**60**:e128-e136.  
16  
17 31 Fleming TR, Emerson SS. Evaluating rivaroxaban for nonvalvular atrial fibrillation--regulatory  
18 considerations. *N Engl J Med*. 2011 Oct 27;365(17):1557-9.  
19  
20 32 Burns T. NICE guidance in schizophrenia: how generalisable are drug trials? *The Psychiatrist*  
21 2006;**30**:210-2.  
22  
23 33 National Institute for Health and Clinical Excellence. Erlotinib monotherapy for maintenance  
24 treatment of non-small-cell lung cancer. 2011. Report No.: TA227.  
25  
26 34 National Institute for Health and Clinical Excellence. Dronedarone for the treatment of non-  
27 permanent atrial fibrillation. 2010. Report No.: TA197.  
28  
29  
30  
31  
32  
33  
34  
35  
36  
37  
38  
39  
40  
41  
42  
43  
44  
45  
46  
47  
48  
49  
50  
51  
52  
53  
54  
55  
56  
57  
58  
59  
60

## Tables

**Table 1: Proportion of GPRD AF patients who met inclusion/exclusion criteria for RE-LY, ARISTOTLE, and ROCKET-AF, stratified by risk of stroke and assessment method**

| Patient population                         | Anticoagulant eligibility                                                                                          | GPRD AF patient population, N (%) | RE-LY<br>GPRD AF patients meeting trial criteria, n (% [95% CI]) | ARISTOTLE<br>GPRD AF patients meeting trial criteria n (% [95% CI]) | ROCKET-AF<br>GPRD AF patients meeting trial criteria, n (% [95% CI]) |
|--------------------------------------------|--------------------------------------------------------------------------------------------------------------------|-----------------------------------|------------------------------------------------------------------|---------------------------------------------------------------------|----------------------------------------------------------------------|
| Total GPRD AF population                   | Not anticoagulant-eligible/potentially anticoagulant-eligible/should receive anticoagulant according to guidelines | 83,898 (100%)                     | 53,640 (64% [63.59-64.41])                                       | 51,415 (61% [60.58-61.42])                                          | 39,892 (48% [47.66-48.34])                                           |
| <b>Intermediate- or high-risk patients</b> |                                                                                                                    |                                   |                                                                  |                                                                     |                                                                      |
| CHADS <sub>2</sub> ≥1                      | Potentially anticoagulant-eligible/should receive anticoagulant according to guidelines                            | 71,493 (85%)                      | 52,783 (74% [73.68-74.32])                                       | 51,415 (72% [71.67-72.33])                                          | 39,892 (56% [55.64-56.36])                                           |
| CHA <sub>2</sub> DS <sub>2</sub> -VASC ≥1  | Potentially anticoagulant-eligible/should receive anticoagulant according to guidelines                            | 78,783 (94%)                      | 53,640 (68% [67.67-68.33])                                       | 51,163 (65% [64.67-65.33])                                          | 39,892 (51% [50.65-51.35])                                           |
| <b>High-risk patients</b>                  |                                                                                                                    |                                   |                                                                  |                                                                     |                                                                      |
| CHADS <sub>2</sub> ≥2                      | Should receive anticoagulant according to guidelines                                                               | 49,099 (59%)                      | 38,493 (78% [77.63-78.37])                                       | 35,712 (73% [72.61-73.39])                                          | 39,892 (81% [80.65-81.35])                                           |
| CHA <sub>2</sub> DS <sub>2</sub> -VASC ≥2  | Should receive anticoagulant according to guidelines                                                               | 72,824 (87%)                      | 53,059 (73% [72.68-73.32])                                       | 50,623 (70% [69.67-70.33])                                          | 39,835 (55% [54.64-55.36])                                           |

AF: Atrial Fibrillation; CI: Confidence Interval; GPRD: General Practice Research Database



**Table 2: Proportion of GPRD AF patients eligible for trial participation according to each inclusion/exclusion criteria identified for RE-LY, ARISTOTLE, and ROCKET-AF**

| Criterion                                                                                       | RE-LY<br>N (%) real-world AF<br>patients meeting<br>criterion | ARISTOTLE<br>N (%) real-world<br>patients meeting<br>criterion | ROCKET-AF<br>N (%) real-world<br>patients meeting<br>criterion |
|-------------------------------------------------------------------------------------------------|---------------------------------------------------------------|----------------------------------------------------------------|----------------------------------------------------------------|
| <b>Inclusion</b>                                                                                |                                                               |                                                                |                                                                |
| AF                                                                                              | 83,898 (100)                                                  | 83,898 (100)                                                   | 83,898 (100)                                                   |
| Age ≥ 75 years                                                                                  | 51,034 (61)                                                   | 51,267 (61)                                                    | 51,034 (61)                                                    |
| Stroke, TIA, systemic embolism                                                                  | 11,632 (14)                                                   | 10,577 (13)                                                    | 11,632 (14)                                                    |
| Risk factors                                                                                    |                                                               |                                                                |                                                                |
| Congestive heart failure                                                                        | 1737 (2)                                                      | 16,184 (19)                                                    | 16,009 (19)                                                    |
| Ejection fraction                                                                               |                                                               |                                                                |                                                                |
| Age ≥ 65 years                                                                                  | 70,047 (83)                                                   | -                                                              | -                                                              |
| Diabetes mellitus                                                                               | 3945 (5)                                                      | 14,940 (18)                                                    | 14,850 (18)                                                    |
| Hypertension                                                                                    | 49,747 (59)                                                   | 49,747 (59)                                                    | 67,833 (81)                                                    |
| Coronary artery disease                                                                         | 28,687 (34)                                                   | -                                                              | -                                                              |
| Overall inclusion criteria                                                                      | 64,710 (77)*                                                  | 67,956 (81)†                                                   | 52,540 (63)‡                                                   |
| <b>Exclusion</b>                                                                                |                                                               |                                                                |                                                                |
| Reversible causes of AF                                                                         | 1,124 (1)                                                     | 2,938 (4)                                                      | 350 (<1)                                                       |
| Mitral valve stenosis                                                                           | -                                                             | 1,213 (1)                                                      | 1213 (1)                                                       |
| Heart valve disorders and conditions other than AF that require chronic anticoagulant treatment | 5,202 (6)                                                     | 5,202 (6)                                                      | 5,202 (6)                                                      |
| Conditions other than AF requiring chronic anticoagulant treatment                              |                                                               |                                                                |                                                                |
| Heart valve disorder                                                                            | 4,792 (6)                                                     |                                                                | 0 (0)                                                          |
| Stroke or TIA                                                                                   |                                                               |                                                                |                                                                |
| Recent stroke                                                                                   | 429 (1)                                                       | 62 (<1)                                                        | 429 (1)                                                        |
| Recent TIA                                                                                      | -                                                             | -                                                              | 71 (<1)                                                        |
| Increased risk of bleeding                                                                      | 1,044 (1)                                                     | 1,044 (1)                                                      | 1,044 (1)                                                      |
| Intracranial neoplasm, arteriovenous malformation, or aneurysm                                  | -                                                             | -                                                              | 2350 (3)                                                       |
| Uncontrolled hypertension                                                                       | 2,014 (2)                                                     | 2,014 (2)                                                      | 2,014 (2)                                                      |
| Planned cardioversion                                                                           | -                                                             | -                                                              | 843 (1)                                                        |
| Renal impairment                                                                                | 2,149 (3)                                                     | 2,149 (3)                                                      | 2,149 (3)                                                      |
| ASA at specified dose                                                                           | -                                                             | 1,629 (2)                                                      | 1,767 (2)                                                      |
| ASA + thienopyridine                                                                            | -                                                             | 203 (<1)                                                       | 203 (<1)                                                       |
| Intravenous antiplatelets                                                                       | -                                                             | -                                                              | 0 (0)                                                          |
| Other concomitant treatments                                                                    |                                                               |                                                                |                                                                |
| Fibrinolytics                                                                                   | 0 (0)                                                         | -                                                              | 0 (0)                                                          |
| NSAID                                                                                           | -                                                             | -                                                              | 2,729 (3)                                                      |
| P450 3A4 inhibitor                                                                              | -                                                             | -                                                              | 4 (<1)                                                         |
| P450 3A4 inducer                                                                                | -                                                             | -                                                              | 1,125 (1)                                                      |
| Investigational drug                                                                            | 0 (0)                                                         | 0 (0)                                                          | 0 (0)                                                          |
| Other concomitant conditions                                                                    |                                                               |                                                                |                                                                |
| Liver disease                                                                                   | 1,547 (2)                                                     | -                                                              | 1,547 (2)                                                      |
| Hepatitis A, B, or C                                                                            | 698 (<1)                                                      | -                                                              | -                                                              |
| HIV                                                                                             | -                                                             | -                                                              | 14 (<1)                                                        |
| Active infective endocarditis                                                                   | 8 (<1)                                                        | 8 (<1)                                                         | 8 (<1)                                                         |
| Anemia                                                                                          | 794 (1)                                                       | 794 (1)                                                        | 794 (1)                                                        |
| Substance abuse and psychosocial                                                                | 28 (<1)                                                       | 28 (<1)                                                        | -                                                              |
| INR monitoring                                                                                  | -                                                             | 3,513 (4)                                                      | -                                                              |
| <b>Overall inclusion and exclusion criteria</b>                                                 | <b>53,640 (64%)</b>                                           | <b>51,415 (61%)</b>                                            | <b>39,892 (48%)</b>                                            |

\*Inclusion criteria for RE-LY specify AF plus at least one of age ≥75 years; history of previous stroke, TIA or systemic embolism; ejection fraction <40%; or symptomatic heart failure OR AF plus age ≥65 years plus one of diabetes mellitus; documented coronary artery disease; or hypertension requiring medical treatment<sup>7</sup>

†Inclusion criteria for ARISTOTLE specify AF plus at least one of age ≥75 years; prior stroke; symptomatic congestive heart failure or ejection fraction ≤40%; diabetes; or hypertension requiring pharmacological treatment<sup>23</sup>

‡Inclusion criteria for ROCKET-AF specify AF plus history of stroke, TIA, or systemic embolism OR AF plus at least two of age ≥75 years; congestive heart failure or ejection fraction ≤35%; or diabetes; or hypertension<sup>22</sup>

Note that the planned cardioversion exclusion criterion within the ROCKET-AF trial was conceptualised within the study by excluding patients having cardioversion within 12 months of the index date

1  
2  
3  
4  
5  
6  
7  
8  
9  
10  
11  
12  
13  
14  
15  
16  
17  
18  
19  
20  
21  
22  
23  
24  
25  
26  
27  
28  
29  
30  
31  
32  
33  
34  
35  
36  
37  
38  
39  
40  
41  
42  
43  
44  
45  
46  
47  
48  
49  
50  
51  
52  
53  
54  
55  
56  
57  
58  
59  
60

AF: Atrial Fibrillation; ASA: acetylsalicylic acid; GPRD: General Practice Research Database; HIV: Human Immunodeficiency Virus; INR: International Normalised Ratio; NSAID: Non-Steroidal Anti-Inflammatory Drug; TIA: Transient Ischemic Attack

For peer review only

1  
2  
3  
4  
5 **Representativeness of the dabigatran, apixaban, and rivaroxaban clinical trial**  
6 **populations to real-world atrial fibrillation patients in the United Kingdom:**  
7 **A cross-sectional analysis using the General Practice Research Database**  
8  
9

10  
11 Sally Lee, PhD<sup>1</sup>, Brigitta U Monz, MD<sup>2</sup>, Andreas Clemens, MD<sup>3</sup>, Martina Brueckmann, MD<sup>3</sup>, Gregory YH  
12 Lip, MD<sup>4</sup>  
13

14 <sup>1</sup>Boehringer Ingelheim Ltd., UK

15  
16 <sup>2</sup>Boehringer Ingelheim GmbH, Ingelheim, Germany

17  
18 <sup>3</sup>Boehringer Ingelheim Pharma GmbH & Co. KG, Ingelheim, Germany

19  
20 <sup>4</sup>University of Birmingham Centre for Cardiovascular Sciences, City Hospital Birmingham, UK  
21  
22

23  
24 Corresponding Author:

25  
26 Name: Dr. Brigitta Monz, MD, MPH, MA Ethics in Medicine

27  
28 Address: Boehringer Ingelheim GmbH, Global Health Economics & Outcomes Research, Binger Str.  
29 173, 55216 Ingelheim am Rhein, Germany

30  
31 Email: [brigitta.monz@boehringer-ingelheim.com](mailto:brigitta.monz@boehringer-ingelheim.com)

32  
33 Fax: +49 (6132) 77 6146

34  
35 Telephone: +49 (6132) 7793362  
36  
37  
38  
39

40  
41 KEYWORDS: apixaban – atrial fibrillation – dabigatran – generalisibility – rivaroxaban  
42  
43

44 | WORD COUNT (excluding title page, abstract, references, and tables): [39903514](#)  
45  
46  
47  
48  
49  
50  
51  
52  
53  
54  
55  
56  
57  
58  
59  
60

1  
2  
3  
4  
5  
6  
7  
8  
9  
10  
11  
12  
13  
14  
15  
16  
17  
18  
19  
20  
21  
22  
23  
24  
25  
26  
27  
28  
29  
30  
31  
32  
33  
34  
35  
36  
37  
38  
39  
40  
41  
42  
43  
44  
45  
46  
47  
48  
49  
50  
51  
52  
53  
54  
55  
56  
57  
58  
59  
60

**Abstract** Word count: 287 words (maximum 300 words)

**Objective:** Three oral anticoagulants have reported study results for stroke prevention in patients with atrial fibrillation (AF) (dabigatran etexilate, rivaroxaban, apixaban); all demonstrated superiority or non-inferiority compared with warfarin (RE-LY, ARISTOTLE, ROCKET-AF). This study aimed to assess the [degree-of-generalisabilityrepresentativeness](#) of the results from RE-LY, ARISTOTLE, and ROCKET-AF to the real-world AF population, particularly the population eligible for anticoagulants, in the UK.

**Design:** A cross-sectional database analysis was conducted.

**Setting:** A dataset derived from the General Practice Research Database (GPRD).

**Primary and secondary outcomes measure:** The proportion of real-world patients with AF who met the inclusion/exclusion criteria for RE-LY, ARISTOTLE, and ROCKET-AF were compared. The results were then stratified by risk of stroke using CHADS<sub>2</sub> and CHA<sub>2</sub>DS<sub>2</sub>-VASc.

**Results:** 83,898 patients with AF were identified in the GPRD. For the population at intermediate or high risk of stroke and eligible for anticoagulant treatment (CHA<sub>2</sub>DS<sub>2</sub>-VASc  $\geq$ 1; n=78,783 [94%]), the proportion eligible for inclusion into RE-LY (dabigatran etexilate) was 68% (95% CI:67.7%-68.3%; n=53,640), compared with 65% (95% CI:64.7%-65.3%; n=51,163) eligible for ARISTOTLE (apixaban) and 51% (95% CI:50.7%-51.4%; n=39,892) eligible for ROCKET-AF (rivaroxaban). Using the CHADS<sub>2</sub> method of risk stratification, for the population at intermediate or high risk of stroke and eligible for anticoagulation treatment (CHADS<sub>2</sub>  $\geq$ 1; n=71,493 [85%]), the proportion eligible for inclusion into RE-LY was 74% (95% CI:73.7%-74.3%; n=52,783), compared with 72% (95% CI:71.7%-72.3%; n=51,415) for ARISTOTLE and 56% (95% CI:55.6%-56.4%; n=39,892) for ROCKET-AF.

1  
2  
3 **Conclusions:** Patients enrolled within RE-LY and ARISTOTLE were more reflective of the 'real-world'  
4 AF population in the UK, in contrast to patients enrolled within ROCKET-AF who were a more  
5 narrowly-defined group of patients at higher risk of stroke. Differences between trials should be taken  
6  
7 into account when considering the ~~generalisability~~applicability of clinical trial findings.  
8  
9  
10  
11  
12  
13  
14  
15  
16  
17  
18  
19  
20  
21  
22  
23  
24  
25  
26  
27  
28  
29  
30  
31  
32  
33  
34  
35  
36  
37  
38  
39  
40  
41  
42  
43  
44  
45  
46  
47  
48  
49  
50  
51  
52  
53  
54  
55  
56  
57  
58  
59  
60

## Article summary

### Article focus

- The focus of this study was to assess the [generalisability-applicability](#) of the findings of three randomised, controlled trials for stroke prevention in patients with atrial fibrillation (AF) to the real-world UK population of individuals with this condition, particularly to patients who would be eligible for anticoagulation under current guidelines.
- The three studies were RE-LY, ARISTOTLE and ROCKET-AF that investigated the efficacy and safety of dabigatran etexilate (dabigatran), apixaban and rivaroxaban compared to warfarin, respectively.

### Key messages

- Patients enrolled in RE-LY and ARISTOTLE were more reflective than patients enrolled in ROCKET-AF with respect to the real-world AF population in the UK, including the population eligible for anticoagulation.
- About 2/3 of patients recommended for anticoagulation would have been eligible to enrol into the clinical study investigating dabigatran (68%) or apixaban (65%) , but only about half of the patients would have been eligible for the rivaroxaban study (51%).
- Differences in [generalisability-representativeness](#) should be taken into account when transferring study findings to patient populations in routine care.

### Strengths and limitations of this study

- The source population for this research, i.e. the General Practice Research Database (GPRD) is the largest primary care database in the world, containing the records of a representative sample of the British population.

- 1  
2  
3  
4  
5  
6  
7  
8  
9  
10  
11  
12  
13  
14  
15  
16  
17  
18  
19  
20  
21  
22  
23  
24  
25  
26  
27  
28  
29  
30  
31  
32  
33  
34  
35  
36  
37  
38  
39  
40  
41  
42  
43  
44  
45  
46  
47  
48  
49  
50  
51  
52  
53  
54  
55  
56  
57  
58  
59  
60
- Operationalisation of the inclusion and exclusion criteria of the clinical studies in order to assess the eligibility for study enrolment of patients seen in routine care required in some instances assumptions.
  - AF diagnosis in the GPRD may not always be accurate. However, the majority of AF cases were correctly coded according to a recent systematic review, and any errors would not be expected to systematically bias the findings of this research [in favour of one study](#).

## Background

Atrial fibrillation (AF) is the most common sustained cardiac arrhythmia, and is associated with an increased risk of stroke and other thromboembolic events. Approximately one in five of all strokes are caused by AF,<sup>1</sup> with the risk of stroke increased by four- to five-fold in patients with AF compared with the general population.<sup>2</sup> The condition is often asymptomatic,<sup>3</sup> but mortality in patients with chronic AF has been reported to be up to 2.5 times higher than in the general population, with the relative risk of death higher in women than in men.<sup>4</sup> The economic burden of AF is also high, with a key cost-driver being hospitalisation. This economic burden of AF has increased significantly over the last few decades, and is expected to increase even more in future due to aging populations.<sup>5</sup>

Oral anticoagulants form the current standard of care for patients with AF considered at intermediate to high risk of stroke, and are effective therapies for stroke prevention.<sup>1,3,6</sup> For many decades, warfarin was the only anticoagulant available; for now, three novel oral anticoagulant agents (dabigatran etexilate [later referred to as dabigatran], apixaban, and rivaroxaban) have demonstrated superiority or non-inferiority to warfarin with respect to the primary efficacy outcome of stroke or systemic embolism in Phase III randomised controlled trials.<sup>7-9</sup>

In RE-LY (n=18,113; ITT population), dabigatran at a dose of 150 mg twice daily was associated with a lower rate of stroke or systemic embolism (Relative Risk [RR], 95% Confidence Interval [CI]: 0.65, 0.52-0.81; p<0.001 for superiority) and did not significantly increase major bleeding (RR, 95% CI: 0.93, 0.81-1.07; p=0.32) when compared with warfarin. At a lower dose (110 mg, twice daily), dabigatran was associated with rates of stroke or systemic embolism that were similar to warfarin (RR, 95% CI: 0.90, 0.74-1.10; p<0.001 for non-inferiority) but significantly reduced major bleeding compared with warfarin (RR, 95% CI: 0.80, 0.70-0.93; p=0.003).<sup>7,10</sup> In ARISTOTLE (n=18,201; ITT population), apixaban (5 mg, twice daily) was associated with a lower rate of stroke or systemic embolism (Hazard Ratio [HR], 95% CI: 0.79, 0.66-0.95; p<0.001 for non-inferiority; p=0.01 for superiority) and reduced rates of major bleeding (HR, 95% CI: 0.69, 0.60-0.80; p<0.001) when compared with warfarin.<sup>9</sup> In ROCKET-AF (n=14,171; ITT population), rivaroxaban (20 mg, once daily) was associated with a similar rate of stroke or systemic embolism compared with warfarin (HR, 95%



1  
2  
3 CI: 0.88, 0.75-1.03;  $p < 0.001$  for non-inferiority,  $p = 0.12$  for superiority; ITT population) with no  
4 significant improvement in the rate of major bleeding (HR, 95% CI: 1.04, 0.90-1.20;  $p = 0.58$ , safety  
5 on treatment population).<sup>8</sup> Of these three anticoagulants, only dabigatran and rivaroxaban are  
6 currently approved in Europe for stroke prevention in patients with AF.<sup>11,12</sup>

7  
8  
9  
10  
11 Although these three RCTs have demonstrated that the three new anticoagulants are superior or non-  
12 inferior to warfarin in terms of stroke prevention, these studies applied specific inclusion and  
13 exclusion criteria that may have excluded patients who would otherwise be treated in real-life clinical  
14 practice, [currently with warfarin](#). Therefore it is unknown whether the patient populations included in  
15 RE-LY, ARISTOTLE, and ROCKET-AF reflect 'real-world' patients with AF, and therefore whether the  
16 study results can be generalised to the wider patient population.

17  
18  
19  
20  
21  
22  
23  
24 To date there have been no studies comparing the eligibility criteria of these three trials. This study  
25 (RADAR: Representativeness and generalisability of the dabigatran, apixaban, and rivaroxaban clinical  
26 trial populations to real-world AF patients in the United Kingdom) aimed to assess the differences  
27 between the three trial populations of RE-LY, ARISTOTLE, and ROCKET-AF and the real-world  
28 patients with AF recorded within the General Practice Research Database (GPRD) in the United  
29 Kingdom (UK). An analysis on patients at intermediate- or high- risk of stroke allowed a focus on  
30 patients for whom, according to current clinical guidelines,<sup>1,3,6,13-15</sup> an anticoagulant could be  
31 prescribed. Risk of stroke is commonly assessed using stroke risk scores, such as the CHADS<sub>2</sub> score.<sup>16</sup>  
32 The CHA<sub>2</sub>DS<sub>2</sub>-VASc score has also been introduced and, based on multiple validation studies, is more  
33 accurate in identifying truly low-risk patients who do not require anticoagulation therapy and is at  
34 least as good as (possibly superior to) CHADS<sub>2</sub> in identifying high-risk patients who develop  
35 thrombembolism.<sup>16</sup> Both CHADS<sub>2</sub> and CHA<sub>2</sub>DS<sub>2</sub>-VASc scores were used to stratify patients in the  
36 current study. [The CHA<sub>2</sub>DS<sub>2</sub>-VASc scoring became available after the three clinical studies had been](#)  
37 [initiated.](#)

38  
39  
40  
41  
42  
43  
44  
45  
46  
47  
48  
49  
50  
51  
52  
53  
54  
55  
56  
57  
58  
59  
60  
It was hypothesised that the trial populations within RE-LY, ROCKET-AF, and ARISTOTLE, as selected  
by the trial protocol inclusion and exclusion criteria, would vary in their [generalisability](#)  
[representativeness](#) to real-world AF populations, particularly for those eligible for anticoagulant

1  
2  
3  
4  
5  
6  
7  
8  
9  
10  
11  
12  
13  
14  
15  
16  
17  
18  
19  
20  
21  
22  
23  
24  
25  
26  
27  
28  
29  
30  
31  
32  
33  
34  
35  
36  
37  
38  
39  
40  
41  
42  
43  
44  
45  
46  
47  
48  
49  
50  
51  
52  
53  
54  
55  
56  
57  
58  
59  
60

treatment based on current guidelines.

For peer review only

## Design

### Objectives

The objective of this study was to assess the ~~generalisability~~ representativeness of RE-LY, ARISTOTLE, and ROCKET-AF to the real-world AF population in the UK. The study design was a cross-sectional database analysis.

### Data source

The GPRD was used as a source of information on the general AF population. In the UK, patients are semi-permanently registered at a specific practice where General Practitioners (GPs) provide primary care and make specialist referrals. These practices centralize the medical information from the GPs themselves, and also information from the specialist referrals and hospitalisations.<sup>17</sup> The GPRD is a computerised database comprising anonymous medical records from over 630 practices in the UK, covering approximately 8% of the UK population.<sup>18</sup> The database contains longitudinal data on patient demographics, diagnoses, referrals, prescribing, and health outcomes and has a geographical distribution that is representative of the UK population.<sup>19</sup> The median proportion of diagnoses correctly coded by the GPRD was recently demonstrated to be 89% (range 24% to 100%) in a systematic literature review of GPRD studies.<sup>20</sup> The GPRD has obtained ethical approval from a Multicentre Research Ethics Committee for all purely observational research using GPRD data; specifically, studies which do not include patient involvement.<sup>21</sup>

### Population

Patients from the GPRD were included if they had a diagnosis of non-valvular AF, were still alive and registered with a GP practice on the 31<sup>st</sup> March 2008, and were aged  $\geq 18$  years of age. An artificial randomisation start date was defined for 31<sup>st</sup> March 2008 to allow sufficient time for the application of prospective exclusion criteria, such as 'clinically significant GI bleeding within six months of randomisation'.

### Inclusion/exclusion criteria

The inclusion/exclusion criteria from RE-LY, ROCKET-AF, and ARISTOTLE were derived primarily from the trial design and rationale publications,<sup>22-24</sup> with clarification sought from supplementary appendices and primary clinical trial result publications<sup>7-9</sup> where required. A full description of the inclusion and exclusion criteria applied is provided in the Supplementary Material. [Of note, the ROCKET-AF trial required patients to have a history of stroke, TIA, or systemic embolism \(i.e. secondary prevention cohort\) or had to have two of the following: age  \$\geq 75\$  years, congestive heart failure or ejection fraction  \$\leq 35\%\$ , diabetes, or hypertension.](#)

With respect to the ROCKET-AF trial, there was a contradiction between the hypertension risk factor inclusion criterion described in the ROCKET-AF rationale and design publication (systolic blood pressure  $\geq 180$  mmHg or diastolic blood pressure  $\geq 100$  mmHg)<sup>22</sup> and in the supplementary appendix of the results publication (use of antihypertensives within 6 months before screening or persistent systolic blood pressure  $>140$  mmHg or persistent diastolic blood pressure  $>90$  mmHg)<sup>8</sup>. In the current analysis the more inclusive criterion from the supplementary appendix has been used in place of the trial design publication.

The inclusion/exclusion criteria were then used to identify the total number of patients with AF in the GPRD who would meet the trial eligibility criteria. READ codes were used as the principal method of identifying patients from the GPRD who would meet the trial inclusion/exclusion criteria. READ codes are a coded thesaurus of clinical terms and form the basic means through which physicians record patient findings and interventions in health and social care IT systems within the UK.<sup>25</sup> Prescription data were also used to identify patients prescribed medications that may have affected their eligibility for one or more of the trials (e.g. long term non-steroidal anti-inflammatory drug usage), and test results were used to identify patients meeting criterion (e.g. abnormal platelet and haemoglobin levels) forming part of the exclusion criteria for the trials.

The CHADS<sub>2</sub> and CHA<sub>2</sub>DS<sub>2</sub>-VASc scores were then used to stratify patients from the GPRD by risk of stroke (low, medium, and high). CHADS<sub>2</sub> assigns one point to patients for chronic heart failure, hypertension, age  $\geq 75$  years, and/or diabetes, and two points for history of stroke or transient

1  
2  
3 ischemic attack (TIA). A score of 1 indicates an intermediate risk of stroke, a score of  $\geq 2$  indicates a  
4 high risk of stroke.<sup>3</sup> In contrast, CHA<sub>2</sub>DS<sub>2</sub>-VASc assigns one point for congestive heart failure,  
5 hypertension, diabetes, vascular disease, female gender, and/or age 65-74 years, and two points for  
6 history of stroke or TIA and/or age  $\geq 75$  years.<sup>16</sup> As with CHADS<sub>2</sub>, a score of 1 on the CHA<sub>2</sub>DS<sub>2</sub>-VASc  
7 indicates an intermediate risk of stroke, and a score of  $\geq 2$  indicates a high risk of stroke.<sup>16</sup>  
8  
9  
10  
11  
12

### 13 **Outcomes**

14  
15  
16 The outcomes of interest were the proportion of real-world patients with AF in the GPRD who would  
17 meet the inclusion/exclusion criteria for each of the three trials (RE-LY, ARISTOTLE, and ROCKET-AF),  
18 as well as the proportion of real-world patients with AF classified at intermediate or high risk of stroke  
19 who would meet the respective inclusion/exclusion criteria, stratified by the risk of stroke according to  
20 both the CHADS<sub>2</sub> and the CHA<sub>2</sub>DS<sub>2</sub>-VASc. The specific inclusion and exclusion criteria for each of the  
21 three trials were also examined to determine if there were key criteria causing differences between  
22 trials.  
23  
24  
25  
26  
27  
28  
29  
30

### 31 **Statistical Analysis**

32  
33  
34 The proportion of patients from the GPRD who would be eligible for RE-LY was compared with the  
35 proportion that would be eligible for ARISTOTLE and ROCKET-AF using the Chi-squared test at a  
36 significance level of 5%. [All analyses are descriptive and exploratory.](#)  
37  
38  
39  
40  
41  
42  
43  
44  
45  
46  
47  
48  
49  
50  
51  
52  
53  
54  
55  
56  
57  
58  
59  
60

## Results

### Patients eligible for RE-LY, ARISTOTLE, and ROCKET-AF

In total, 83,898 patients with AF were identified from the GPRD ([Table 1](#)). Of these patients, 64% met the inclusion/exclusion criteria for enrolment into RE-LY. This compares with 61% of patients who were eligible for inclusion into ARISTOTLE and 48% of patients who were eligible for inclusion into ROCKET-AF. The proportion of real-world patients who would be eligible for inclusion within the RE-LY trial was statistically significantly higher than the proportion of real-world patients who would be eligible for ARISTOTLE or ROCKET-AF ( $p < 0.001$  for both comparisons), though the small difference against ARISTOTLE is probably not clinically meaningful.

### Intermediate- and high-risk patients eligible for RE-LY, ARISTOTLE, and ROCKET-AF

In clinical practice, only patients considered at intermediate or high risk of stroke would receive anticoagulation therapy. Using the CHADS<sub>2</sub> score, 71,493 (85%) patients from the total GPRD AF population would be eligible for anticoagulant therapy, of which 74% would meet the RE-LY inclusion/exclusion criteria, 72% would meet the ARISTOTLE criteria, and 56% would meet the ROCKET-AF criteria ([Table 1](#)). Using the CHA<sub>2</sub>DS<sub>2</sub>-VASc score, 78,783 (94%) patients from the total GPRD population would be eligible for anticoagulant therapy, of which 68% would meet the RE-LY inclusion/exclusion criteria, 65% would meet the ARISTOTLE criteria, and 51% would meet the ROCKET-AF criteria ([Table 1](#)).

### Eligibility by individual inclusion and exclusion criterion

The inclusion rather than exclusion criteria were the primary determinants for the trial population in RE-LY (77% of GPRD AF population eligible), ARISTOTLE (81% of GPRD AF population eligible), and ROCKET-AF (63% of GPRD AF population eligible), as would be expected (Table 2). Within the inclusion criteria, the greatest difference between trials was seen with [the hypertension definition](#), where 81% of the GPRD AF population met this criterion in ROCKET-AF, compared to 59% of real-world patients for the RE-LY and ARISTOTLE hypertension criteria (Table 2). This difference, which favours ROCKET-AF over RE-LY and ARISTOTLE with respect to inclusivity, did not appear to be a

1  
2  
3 major driver for differences in overall inclusion eligibility for the trials. Instead, the differences in  
4 inclusion eligibility were not driven by an individual inclusion criterion, but by the different  
5 combinations of individual inclusion criteria within the trials.  
6  
7

8  
9  
10 For the exclusion criteria specifically, the requirement for anticoagulant treatment for conditions other  
11 than AF excluded 6% of GPRD patients with AF from all trials, with renal impairment excluding a  
12 further 3% of the GPRD AF population. Although the exclusion criteria differed between trials, none of  
13 the individual criteria appear to be a key driver of the different proportions of real-world patients  
14 eligible for the trials (Table 2).  
15  
16  
17  
18  
19  
20  
21  
22  
23  
24  
25  
26  
27  
28  
29  
30  
31  
32  
33  
34  
35  
36  
37  
38  
39  
40  
41  
42  
43  
44  
45  
46  
47  
48  
49  
50  
51  
52  
53  
54  
55  
56  
57  
58  
59  
60

## Discussion

The results of this analysis demonstrate that the [warfarin-controlled](#) pivotal trials for the novel oral anticoagulants dabigatran (RE-LY), apixaban (ARISTOTLE), and rivaroxaban (ROCKET-AF) vary in their [generalisability-representativeness](#) of the AF population enrolled. Based on GPRD, the RE-LY trial enrolled a patient population that is most closely matched to patients with AF seen in general practice within the UK compared to the populations enrolled according to the exclusion/inclusion criteria for the other trials. Overall, 68% of intermediate- or high-risk patients with AF captured within the GPRD would be eligible for inclusion into RE-LY, as compared with 65% and 51% for ARISTOTLE and ROCKET-AF respectively (as categorised by CHA<sub>2</sub>DS<sub>2</sub>-VASc $\geq$ 1). Being more inclusive and representative of the general AF population allows trial findings to be more readily generalised to patients seen in everyday clinical practice (and eligible for anticoagulant therapy). The RE-LY patient population is also slightly more inclusive of AF patients eligible for anticoagulant treatment, than the population in the ARISTOTLE trial (difference of 3%;  $p < 0.001$ ) but this statistically significant difference between the RE-LY and ARISTOTLE populations would not necessarily translate into clinically meaningful differences for the real-world population.

It is important to note that a higher risk patient population was intentionally enrolled in ROCKET-AF (mean CHADS<sub>2</sub> risk score of 3.48) compared with both the RE-LY (mean CHADS<sub>2</sub> risk score of 2.1) and ARISTOTLE (mean CHADS<sub>2</sub> risk score of 2.2) trials, and thus, a large number of patients who would be eligible for anticoagulant treatment under current guidelines would not have been entered into ROCKET-AF. [Indeed, there are no data for patients with a CHADS<sub>2</sub> score 0-1 in ROCKET-AF, and only 13% of this trial population had a CHADS<sub>2</sub> score of 2.<sup>8</sup>](#) ~~Indeed, a~~ significant number of patients who could be eligible for anticoagulation in general practice (intermediate or high risk of stroke according to the CHADS<sub>2</sub> risk score) and who would be included within RE-LY are excluded from ROCKET-AF (18%). In total, 13,748 patients with AF eligible for the RE-LY study would have been excluded from the ROCKET-AF trial within the total GPRD AF population (low, intermediate, or high risk of stroke). Thus, some care should be taken when generalizing the trial results from the high risk subpopulation seen in ROCKET-AF to the general AF population encountered in clinical practice.



1  
2  
3 Trial generalisability (external validity) is a recognised problem in randomised controlled trials. The  
4 trial participants enrolled in a trial may differ considerably from the target population/clinical practice  
5 in which the trial's findings are later used, and trial eligibility criteria can contribute to this lack of  
6 generalisability.<sup>26</sup> The current analysis indicates that the rate of inclusion observed within the RE-LY  
7 trial (and probably, ARISTOTLE) is at least as representative of the general population as other  
8 pivotal trials have been found to be. For example, a recent analysis of patients enrolled in eight  
9 placebo controlled clinical trials for amyotrophic lateral sclerosis (ALS) found that 66% of patients  
10 diagnosed with ALS in Italy between 2003 and 2008 met the eligibility criteria for the trials.<sup>27</sup>  
11 However, this analysis reported that the ALS patients enrolled within the clinical trials were  
12 demographically and clinically different from the patients within the national ALS population, with the  
13 differences between the trial cohorts and patient population resulting in part from the different  
14 eligibility criteria used and in part from factors unrelated to enrolment criteria. With respect to risk of  
15 stroke as determined by CHADS<sub>2</sub> score, 26% of individuals in a study of the incidence and prevalence  
16 of chronic AF in the UK (using also the GPRD as a data source), had a CHADS<sub>2</sub> score of  $\geq 3$ ,<sup>17</sup>  
17 compared with 33% in RE-LY,<sup>7</sup> 32% in ARISTOTLE,<sup>9</sup> and 87% in ROCKET-AF.<sup>8</sup> This demonstrates  
18 that both RE-LY and ARISTOTLE were substantially more reflective of the real-world AF population  
19 (based on the GPRD) than ROCKET-AF when considering the proportion of the population at differing  
20 risk of stroke. It is interesting to note that little research has actually been conducted to quantify the  
21 representativeness of trial populations with regards to real life populations. This is surprising given  
22 that the external validity of trials is always questioned, especially in the context of reimbursement  
23 decisions and Health Technology Assessments (HTA). More systematic research in this area appears  
24 to be warranted, particularly with respect to how the external validity of a trial then affects the  
25 'translation' of efficacy to effectiveness.  
26  
27  
28  
29  
30  
31  
32  
33  
34  
35  
36  
37  
38  
39  
40  
41  
42  
43  
44  
45  
46  
47

48  
49 When classifying patient risk, risk groups stratified by the CHA<sub>2</sub>DS<sub>2</sub>-VASc score may be considered to  
50 be more accurate than those stratified by CHADS<sub>2</sub>, particularly to identify 'truly low risk' patients who  
51 do not need any antithrombotic therapy, due to the more inclusive nature of common stroke risk  
52 factors in CHA<sub>2</sub>DS<sub>2</sub>-VASc.<sup>16</sup> This is important when considering the results of the current study, since  
53 the intermediate or high risk population by CHA<sub>2</sub>DS<sub>2</sub>-VASc included 7,290 more patients than did the  
54  
55  
56  
57  
58  
59  
60

1  
2  
3 intermediate or high risk population by CHADS<sub>2</sub>. These patients are at risk of stroke but may not  
4 receive treatment if miscategorised as low risk by the CHADS<sub>2</sub> score; indeed, one recent analysis  
5 suggests that a CHADS<sub>2</sub> score=0 is not low risk with stroke rates that can range between 0.8% per  
6 year to 3.2% per year when subdivided by CHA<sub>2</sub>DS<sub>2</sub>-VASc score.<sup>28</sup> The 2010 ESC guidelines suggest  
7 that although CHADS<sub>2</sub> is useful as a simple initial means of assessing risk, patients scoring 0 or 1  
8 should undergo more comprehensive assessment, for example with CHA<sub>2</sub>DS<sub>2</sub>-VASc.<sup>1</sup> [In the 2012  
9 focussed update of the ESC guidelines, the only recommended stroke risk score is CHA<sub>2</sub>DS<sub>2</sub>-VASc,  
10 with the initial focus on identification 'truly low risk' patients \(that is, age <65 and lone AF, or  
11 CHA<sub>2</sub>DS<sub>2</sub>-VASc=0\) who do not need any antithrombotic therapy. Those with ≥1 stroke risk factors  
12 can be offered effective stroke prevention, which is oral anticoagulation.](#)<sup>29</sup>  
13  
14  
15  
16  
17  
18  
19  
20  
21  
22  
23

## 24 25 26 **Limitations**

27  
28  
29 It should be noted that a number of the criteria included in the trial design for RE-LY, ARISTOTLE,  
30 and ROCKET-AF were not recorded in the GPRD or were difficult to extract. For example, planned  
31 major surgery would not be captured within the database, nor would a life expectancy of less than 1  
32 year, both of which are exclusion criteria in one or more of the trials. However, these criteria were  
33 likely to have had minimal impact on the final populations included within the RCTs, since many of  
34 the criteria that could not be applied to the GPRD population were consistent across all three trials.  
35 This means that the impact of applying the individual criterion would be the same across RE-LY,  
36 ARISTOTLE, and ROCKET-AF, with only the order of magnitude affected. A potential limitation of the  
37 current study is that the analyses were reliant on the quality of GP coding in the GPRD dataset. A  
38 recent systematic review of the validity of diagnostic coding in the GPRD reported that >80% of  
39 events such as myocardial infarction and stroke were correctly coded, but a lower proportion (64.4%)  
40 of AF cases were correctly coded.<sup>30,29</sup> This means that there may be some error in the characteristics  
41 of the GPRD population taken to be a reflection of the general AF population in the UK. However, this  
42 is unlikely to affect the conclusion drawn from the current study, since the errors in coding are  
43 unlikely to be focused on a specific subgroup of patients and instead would be expected to be  
44  
45  
46  
47  
48  
49  
50  
51  
52  
53  
54  
55  
56  
57  
58  
59  
60

1  
2  
3 distributed across the whole AF population in the UK. Although the total number of patients classified  
4 as having AF in the GPRD may be lower than the total number of patients with AF in the UK, there is  
5 no reason to suspect that the patients miscoded would have systematically differed in characteristics  
6  
7  
8  
9 to those correctly coded within the database.

10  
11  
12  
13 [In order to answer the question of generalisability, it would be necessary to compare clinical trial](#)  
14 [results with effectiveness and safety findings observed in routine care. However, to undertake such](#)  
15 [real-life assessments typically takes several years as the drugs in question need to become used](#)  
16 [widely. Therefore, Health Technology Assessment \(HTA\) bodies \(such as NICE in the UK\) often](#)  
17 [request that evidence is presented to what extent a trial population is reflective of the population for](#)  
18 [which the coverage decision has to be taken and for which the drug is likely to be used in routine](#)  
19 [practice. If a study population is very different from the one for which the drug will be used in routine](#)  
20 [care, this will increase the uncertainty in such HTA decisions. Such assessment as ours therefore can](#)  
21 [serve as a first indication of generalisability. A further limitation is that other study factors that can](#)  
22 [influence generalisability have not been investigated in this research, such as the countries](#)  
23 [participating in the studies or the quality of the warfarin arm as an indicator for the quality of patient](#)  
24 [care<sup>31</sup>.](#)

## 35 36 37 38 **Conclusion**

39  
40  
41 Trial generalisability is an important consideration for the National Institute of Health and Clinical  
42 Excellence (NICE) in the UK and other such HTA bodies, with past criticisms focusing on the lack of  
43 generalisability of trials as a result of the eligibility criteria applied.<sup>32-9-324</sup> The current analysis  
44 demonstrates that the data from RE-LY and ARISTOTLE are applicable to a larger proportion of real-  
45 world AF patients than data from ROCKET-AF, meaning that the results from the study supporting the  
46 use of dabigatran and apixaban are more generalizable to the general anticoagulant eligible AF  
47  
48  
49  
50  
51  
52  
53  
54  
55  
56  
57  
58  
59  
60 population.

## Acknowledgements

With thanks to James Cann and Ebony Samuels at HERON Evidence Development for contributing to the preparation of the initial draft manuscript.

## Funding source

The study was funded by Boehringer Ingelheim International GmbH.

## Author contributions

SL was responsible for study design, data extraction, and statistical analysis; BM, AC, MB, and GL contributed to study concept, design, and data interpretation. All authors reviewed and significantly contributed to the initial draft manuscript and approved the final submitted version.

## Conflict of interest

SL, BM, AC, and MB are employees of Boehringer Ingelheim, [the manufacturer of dabigatran](#). GYHL has served as a consultant for Bayer, Astellas, Merck, Sanofi, BMS/Pfizer, Daiichi-Sankyo, Biotronik, Portola and Boehringer Ingelheim and has been on the speakers' bureau for Bayer, BMS/Pfizer, Boehringer Ingelheim, and Sanofi Aventis.

## References

- 1 [Camm AJ-KP, Lip GY, Schotten UKirchhof P, Lip GYH, et al.](#) –Guidelines for the management of atrial fibrillation: the Task Force for the Management of Atrial Fibrillation of the European Society of Cardiology. *Eur Heart J* 2010;**31**:2369-429.
- 2 Wolf PA, Abbott RD, Kannel WB. Atrial fibrillation as an independent risk factor for stroke: the Framingham Study. *Stroke* 1991;**22**:983-8.
- 3 National Collaborating Centre for Chronic Conditions. Atrial fibrillation: national clinical guidelines for management in primary and secondary care. London: Royal College of Physicians; 2006.
- 4 Ruigomez A, Johansson S, Wallander MA, et al. Risk of mortality in a cohort of patients newly diagnosed with chronic atrial fibrillation. *BMC Cardiovasc Disord* 2002;**2**:5.
- 5 Wolowacz SE, Samuel M, Brennan VK, et al. The cost of illness of atrial fibrillation: a systematic review of the recent literature. *Europace* 2011;**13**:1375-85.
- 6 Fuster V, Ryden LE, Cannom DS, et al. ACC/AHA/ESC 2006 Guidelines for the management of patients with atrial fibrillation: a report of the American College of Cardiology/American Heart Association Task Force on Practice Guidelines and the European Society of Cardiology Committee for Practice Guidelines (Writing Committee to Revise the 2001 Guidelines for the Management of Patients With Atrial Fibrillation). *Circulation* 2006;**114**:e257-e354.
- 7 Connolly SJ, Ezekowitz MD, Yusuf S, et al. Dabigatran versus warfarin in patients with atrial fibrillation (with supplementary appendix). *N Engl J Med* 2009;**361**:1139-51.
- 8 Patel MR, Mahaffey KW, Garg J, et al. Rivaroxaban versus warfarin in nonvalvular atrial fibrillation (with supplementary appendix). *New Engl J Med* 2011;**365**:883-91.
- 9 Granger CB, Alexander JH, McMurray JJV, et al. Apixaban versus warfarin in patients with atrial fibrillation (including supplementary appendix and study protocol). *New Engl J Med* 2011;**365**:981-92.
- 10 Connolly SJ, Ezekowitz MD, Yusuf S, et al. Newly identified events in the RE-LY trial. *New Engl J Med* 2010;**363**:1875-6.
- 11 Boehringer Ingelheim. Pradaxa 150 mg: summary of product characteristics. emc 2011 August 18 [cited 2011 Nov 8];Available from: URL: <http://www.medicines.org.uk/EMC/medicine/24839/SPC/Pradaxa+150+mg+hard+capsules/>
- 12 Bayer plc. Xarelto 20mg film-coated tablets. emc 2011 [cited 2012 Feb 13];Available from: URL: <http://www.medicines.org.uk/EMC/medicine/25586/SPC/Xarelto+20mg+film-coated+tablets/>
- 13 Wann LS, Curtis AB, Ellenbogen KA, et al. 2011 ACCF/AHA/HRS focused update on the management of patients with atrial fibrillation (update on dabigatran). A report of the American College of Cardiology Foundation/American Heart Association Task Force on Practice Guidelines. *Heart Rhythm* 2011;**8**:e1-e8.

- 1  
2  
3 14 You JJ, Singer DE, Howard PA, et al. Antithrombotic therapy for atrial fibrillation: Antithrombotic  
4 Therapy and Prevention of Thrombosis, 9th ed: American College of Chest Physicians Evidence-  
5 Based Clinical Practice Guidelines. *Chest* 2012;**141**:e531S-e575S.  
6  
7 15 Skanes AC, Healey JS, Cairns JA, et al. Focused 2012 update of the Canadian Cardiovascular  
8 Society atrial fibrillation guidelines: recommendations for stroke prevention and rate/rhythm  
9 control. *Can J Cardiol* 2012;**28**:125-36.  
10  
11 16 Lip GYH, Nieuwlaat R, Pisters R, et al. Refining clinical risk stratification for predicting stroke  
12 and thromboembolism in atrial fibrillation using a novel risk factor-based approach: the Euro  
13 heart survey on atrial fibrillation. *Chest* 2010;**137**:263-72.  
14  
15 17 Rietbrock S, Heeley E, Plumb J, et al. Chronic atrial fibrillation: incidence, prevalence, and  
16 prediction of stroke using the Congestive heart failure, Hypertension, Age >75, Diabetes  
17 mellitus, and prior Stroke or transient ischemic attack (CHADS2) risk stratification scheme. *Am*  
18 *Heart J* 2008;**156**:57-64.  
19  
20 18 General Practice Research Database. The database. Medicines and Healthcare products  
21 Regulatory Agency 2011 [cited 2011 Nov 2];Available from: URL:  
22 <http://www.gprd.com/products/database.asp>  
23  
24 19 Garcia Rodriguez LA, Perez Gutthann S. Use of the UK General Practice Research Database for  
25 pharmacoepidemiology. *Br J Clin Pharmacology* 1998;**45**:419-25.  
26  
27 20 Herrett E, Thomas SL, Schoonen WM, et al. Validation and validity of diagnoses in the General  
28 Practice Research Database: a systematic review. *Br J Clin Pharmacology* 2010;**69**:4-14.  
29  
30 21 General Practice Research Database. Ethical review for GPRD protocols. Medicines and  
31 Healthcare products Regulatory Agency 2012 [cited 2012 Jan 26];Available from: URL:  
32 <http://www.gprd.com/isac/#ethicalReview>  
33  
34 22 Patel M. Rivaroxaban once-daily, oral, direct factor Xa inhibition compared with vitamin K  
35 antagonism for prevention of stroke and embolism trial in atrial fibrillation: rationale and design  
36 of the ROCKET AF study. *Am Heart J* 2010;**159**:340-7.  
37  
38 23 Lopes RD, Alexander JH, Al-Khatib SM, et al. Apixaban for reduction in stroke and other  
39 thromboembolic events in atrial fibrillation (ARISTOTLE) trial: design and rationale. *Am Heart J*  
40 2010;**159**:331-9.  
41  
42 24 Ezekowitz MD, Connolly S, Parekh A, et al. Rationale and design of RE-LY: randomized  
43 evaluation of long-term anticoagulant therapy, warfarin, compared with dabigatran. *Am Heart J*  
44 2009;**157**:805-10, 810.  
45  
46 25 National Health Service. READ codes. NHS Connecting for Health 2011 [cited 2011 Dec  
47 14];Available from: URL:  
48 <http://www.connectingforhealth.nhs.uk/systemsandservices/data/uktc/readcodes>  
49  
50 26 Weiss NS, Koepsell TD, Psaty BM. Generalizability of the results of randomized trials. *Arch*  
51 *Intern Med* 2008;**168**:133-5.  
52  
53  
54  
55  
56  
57  
58  
59  
60

- 1  
2  
3 27 Chio A, Canosa A, Gallo S, et al. ALS clinical trials: do enrolled patients accurately represent the  
4 ALS population? *Neurology* 2011;**77**:1432-7.  
5  
6 28 Olesen JB, Torp-Pedersen C, Hansen ML, et al. The value of the CHA2DS2-VASc score for  
7 refining stroke risk stratification in patients with atrial fibrillation with a CHADS2 score 0-1: A  
8 nationwide cohort study. *Thromb Haemost* 2012;**107**:1172-9.  
9  
10 [29 Camm AJ, Lip GYH, De Caterina R, et al. 2012 focused update of the ESC Guidelines](#)  
11 [for the management of atrial fibrillation. An update of the 2010 ESC Guidelines for the](#)  
12 [management of atrial fibrillation. \*Eur Heart J.\* 2012 Aug 24. \[Epub ahead of print\]](#)  
13  
14 [3029](#) \_Khan N, Harrison S, Rose P. Validity of diagnostic coding within the General Practice Research  
15 Database: a systematic review. *Br J Gen Pract* 2011;**60**:e128-e136.  
16  
17 [31 Fleming TR, Emerson SS. Evaluating rivaroxaban for nonvalvular atrial fibrillation--regulatory](#)  
18 [considerations. \*N Engl J Med.\* 2011 Oct 27;365\(17\):1557-9.](#)  
19  
20 [320](#) Burns T. NICE guidance in schizophrenia: how generalisable are drug trials? *The Psychiatrist*  
21 2006;**30**:210-2.  
22  
23 [331](#) National Institute for Health and Clinical Excellence. Erlotinib monotherapy for maintenance  
24 treatment of non-small-cell lung cancer. 2011. Report No.: TA227.  
25  
26 [342](#) National Institute for Health and Clinical Excellence. Dronedarone for the treatment of non-  
27 permanent atrial fibrillation. 2010. Report No.: TA197.  
28  
29  
30  
31  
32  
33  
34  
35  
36  
37  
38  
39  
40  
41  
42  
43  
44  
45  
46  
47  
48  
49  
50  
51  
52  
53  
54  
55  
56  
57  
58  
59  
60

## Tables

**Table 1: Proportion of GPRD AF patients who met inclusion/exclusion criteria for RE-LY, ARISTOTLE, and ROCKET-AF, stratified by risk of stroke and assessment method**

| Patient population                         | Anticoagulant eligibility                                                                                          | GPRD AF patient population, N (%) | RE-LY<br>GPRD AF patients meeting trial criteria, n (% [95% CI]) | ARISTOTLE<br>GPRD AF patients meeting trial criteria n (% [95% CI]) | ROCKET-AF<br>GPRD AF patients meeting trial criteria, n (% [95% CI]) |
|--------------------------------------------|--------------------------------------------------------------------------------------------------------------------|-----------------------------------|------------------------------------------------------------------|---------------------------------------------------------------------|----------------------------------------------------------------------|
| Total GPRD AF population                   | Not anticoagulant-eligible/potentially anticoagulant-eligible/should receive anticoagulant according to guidelines | 83,898 (100%)                     | 53,640 (64% [63.59-64.41])                                       | 51,415 (61% [60.58-61.42])                                          | 39,892 (48% [47.66-48.34])                                           |
| <b>Intermediate- or high-risk patients</b> |                                                                                                                    |                                   |                                                                  |                                                                     |                                                                      |
| CHADS <sub>2</sub> ≥1                      | Potentially anticoagulant-eligible/should receive anticoagulant according to guidelines                            | 71,493 (85%)                      | 52,783 (74% [73.68-74.32])                                       | 51,415 (72% [71.67-72.33])                                          | 39,892 (56% [55.64-56.36])                                           |
| CHA <sub>2</sub> DS <sub>2</sub> -VASC ≥1  | Potentially anticoagulant-eligible/should receive anticoagulant according to guidelines                            | 78,783 (94%)                      | 53,640 (68% [67.67-68.33])                                       | 51,163 (65% [64.67-65.33])                                          | 39,892 (51% [50.65-51.35])                                           |
| <b>High-risk patients</b>                  |                                                                                                                    |                                   |                                                                  |                                                                     |                                                                      |
| CHADS <sub>2</sub> ≥2                      | Should receive anticoagulant according to guidelines                                                               | 49,099 (59%)                      | 38,493 (78% [77.63-78.37])                                       | 35,712 (73% [72.61-73.39])                                          | 39,892 (81% [80.65-81.35])                                           |
| CHA <sub>2</sub> DS <sub>2</sub> -VASC ≥2  | Should receive anticoagulant according to guidelines                                                               | 72,824 (87%)                      | 53,059 (73% [72.68-73.32])                                       | 50,623 (70% [69.67-70.33])                                          | 39,835 (55% [54.64-55.36])                                           |

AF: Atrial Fibrillation; CI: Confidence Interval; GPRD: General Practice Research Database



**Table 2: Proportion of GPRD AF patients eligible for trial participation according to each inclusion/exclusion criteria identified for RE-LY, ARISTOTLE, and ROCKET-AF**

| Criterion                                                                                       | RE-LY<br>N (%) real-world AF<br>patients meeting<br>criterion | ARISTOTLE<br>N (%) real-world<br>patients meeting<br>criterion | ROCKET-AF<br>N (%) real-world<br>patients meeting<br>criterion |
|-------------------------------------------------------------------------------------------------|---------------------------------------------------------------|----------------------------------------------------------------|----------------------------------------------------------------|
| <b>Inclusion</b>                                                                                |                                                               |                                                                |                                                                |
| AF                                                                                              | 83,898 (100)                                                  | 83,898 (100)                                                   | 83,898 (100)                                                   |
| Age ≥ 75 years                                                                                  | 51,034 (61)                                                   | 51,267 (61)                                                    | 51,034 (61)                                                    |
| Stroke, TIA, systemic embolism                                                                  | 11,632 (14)                                                   | 10,577 (13)                                                    | 11,632 (14)                                                    |
| Risk factors                                                                                    |                                                               |                                                                |                                                                |
| Congestive heart failure                                                                        | 1737 (2)                                                      | 16,184 (19)                                                    | 16,009 (19)                                                    |
| Ejection fraction                                                                               |                                                               |                                                                |                                                                |
| Age ≥ 65 years                                                                                  | 70,047 (83)                                                   | -                                                              | -                                                              |
| Diabetes mellitus                                                                               | 3945 (5)                                                      | 14,940 (18)                                                    | 14,850 (18)                                                    |
| Hypertension                                                                                    | 49,747 (59)                                                   | 49,747 (59)                                                    | 67,833 (81)                                                    |
| Coronary artery disease                                                                         | 28,687 (34)                                                   | -                                                              | -                                                              |
| Overall inclusion criteria                                                                      | 64,710 (77)*                                                  | 67,956 (81)†                                                   | 52,540 (63)‡                                                   |
| <b>Exclusion</b>                                                                                |                                                               |                                                                |                                                                |
| Reversible causes of AF                                                                         | 1,124 (1)                                                     | 2,938 (4)                                                      | 350 (<1)                                                       |
| Mitral valve stenosis                                                                           | -                                                             | 1,213 (1)                                                      | 1213 (1)                                                       |
| Heart valve disorders and conditions other than AF that require chronic anticoagulant treatment | 5,202 (6)                                                     | 5,202 (6)                                                      | 5,202 (6)                                                      |
| Conditions other than AF requiring chronic anticoagulant treatment                              |                                                               |                                                                |                                                                |
| Heart valve disorder                                                                            | 4,792 (6)                                                     | -                                                              | 0 (0)                                                          |
| Stroke or TIA                                                                                   |                                                               |                                                                |                                                                |
| Recent stroke                                                                                   | 429 (1)                                                       | 62 (<1)                                                        | 429 (1)                                                        |
| Recent TIA                                                                                      | -                                                             | -                                                              | 71 (<1)                                                        |
| Increased risk of bleeding                                                                      | 1,044 (1)                                                     | 1,044 (1)                                                      | 1,044 (1)                                                      |
| Intracranial neoplasm, arteriovenous malformation, or aneurysm                                  | -                                                             | -                                                              | 2350 (3)                                                       |
| Uncontrolled hypertension                                                                       | 2,014 (2)                                                     | 2,014 (2)                                                      | 2,014 (2)                                                      |
| Planned cardioversion                                                                           | -                                                             | -                                                              | 843 (1)                                                        |
| Renal impairment                                                                                | 2,149 (3)                                                     | 2,149 (3)                                                      | 2,149 (3)                                                      |
| ASA at specified dose                                                                           | -                                                             | 1,629 (2)                                                      | 1,767 (2)                                                      |
| ASA + thienopyridine                                                                            | -                                                             | 203 (<1)                                                       | 203 (<1)                                                       |
| Intravenous antiplatelets                                                                       | -                                                             | -                                                              | 0 (0)                                                          |
| Other concomitant treatments                                                                    |                                                               |                                                                |                                                                |
| Fibrinolytics                                                                                   | 0 (0)                                                         | -                                                              | 0 (0)                                                          |
| NSAID                                                                                           | -                                                             | -                                                              | 2,729 (3)                                                      |
| P450 3A4 inhibitor                                                                              | -                                                             | -                                                              | 4 (<1)                                                         |
| P450 3A4 inducer                                                                                | -                                                             | -                                                              | 1,125 (1)                                                      |
| Investigational drug                                                                            | 0 (0)                                                         | 0 (0)                                                          | 0 (0)                                                          |
| Other concomitant conditions                                                                    |                                                               |                                                                |                                                                |
| Liver disease                                                                                   | 1,547 (2)                                                     | -                                                              | 1,547 (2)                                                      |
| Hepatitis A, B, or C                                                                            | 698 (<1)                                                      | -                                                              | -                                                              |
| HIV                                                                                             | -                                                             | -                                                              | 14 (<1)                                                        |
| Active infective endocarditis                                                                   | 8 (<1)                                                        | 8 (<1)                                                         | 8 (<1)                                                         |
| Anemia                                                                                          | 794 (1)                                                       | 794 (1)                                                        | 794 (1)                                                        |
| Substance abuse and psychosocial                                                                | 28 (<1)                                                       | 28 (<1)                                                        | -                                                              |
| INR monitoring                                                                                  | -                                                             | 3,513 (4)                                                      | -                                                              |
| <b>Overall inclusion and exclusion criteria</b>                                                 | <b>53,640 (64%)</b>                                           | <b>51,415 (61%)</b>                                            | <b>39,892 (48%)</b>                                            |

\*Inclusion criteria for RE-LY specify AF plus at least one of age ≥75 years; history of previous stroke, TIA or systemic embolism; ejection fraction <40%; or symptomatic heart failure OR AF plus age ≥65 years plus one of diabetes mellitus; documented coronary artery disease; or hypertension requiring medical treatment<sup>7</sup>

†Inclusion criteria for ARISTOTLE specify AF plus at least one of age ≥75 years; prior stroke; symptomatic congestive heart failure or ejection fraction ≤40%; diabetes; or hypertension requiring pharmacological treatment<sup>23</sup>

‡Inclusion criteria for ROCKET-AF specify AF plus history of stroke, TIA, or systemic embolism OR AF plus at least two of age ≥75 years; congestive heart failure or ejection fraction ≤35%; or diabetes; or hypertension<sup>22</sup>

Note that the planned cardioversion exclusion criterion within the ROCKET-AF trial was conceptualised within the study by excluding patients having cardioversion within 12 months of the index date

1  
2  
3  
4  
5  
6  
7  
8  
9  
10  
11  
12  
13  
14  
15  
16  
17  
18  
19  
20  
21  
22  
23  
24  
25  
26  
27  
28  
29  
30  
31  
32  
33  
34  
35  
36  
37  
38  
39  
40  
41  
42  
43  
44  
45  
46  
47  
48  
49  
50  
51  
52  
53  
54  
55  
56  
57  
58  
59  
60

AF: Atrial Fibrillation; ASA: acetylsalicylic acid; GPRD: General Practice Research Database; HIV: Human Immunodeficiency Virus; INR: International Normalised Ratio; NSAID: Non-Steroidal Anti-Inflammatory Drug; TIA: Transient Ischemic Attack

For peer review only

## Supplementary data

A description of the inclusion and exclusion criteria for each trial is provided in the table.

**Table: Inclusion/exclusion criteria for RE-LY, ARISTOTLE, and ROCKET-AF**

| Criterion type                                                                                  | RE-LY                                                                                                                                                                                                                                                                                                                                                                                                                                                                                                                                                          | ARISTOTLE                                                                                                                                                                                                                                                                 | ROCKET-AF                                                                                                                                                                                                                                                                                                                                                                                                                                                                                                                                   |
|-------------------------------------------------------------------------------------------------|----------------------------------------------------------------------------------------------------------------------------------------------------------------------------------------------------------------------------------------------------------------------------------------------------------------------------------------------------------------------------------------------------------------------------------------------------------------------------------------------------------------------------------------------------------------|---------------------------------------------------------------------------------------------------------------------------------------------------------------------------------------------------------------------------------------------------------------------------|---------------------------------------------------------------------------------------------------------------------------------------------------------------------------------------------------------------------------------------------------------------------------------------------------------------------------------------------------------------------------------------------------------------------------------------------------------------------------------------------------------------------------------------------|
| <b>Inclusion</b>                                                                                |                                                                                                                                                                                                                                                                                                                                                                                                                                                                                                                                                                |                                                                                                                                                                                                                                                                           |                                                                                                                                                                                                                                                                                                                                                                                                                                                                                                                                             |
| Age                                                                                             | ≥18 years                                                                                                                                                                                                                                                                                                                                                                                                                                                                                                                                                      | ≥18 years                                                                                                                                                                                                                                                                 | ≥18 years                                                                                                                                                                                                                                                                                                                                                                                                                                                                                                                                   |
| AF                                                                                              | AF documented by ECG on enrolment; or symptomatic episode of paroxysmal or persistent AF documented by 12-lead ECG within 6 months before randomisation; or asymptomatic or symptomatic paroxysmal or persistent AF on 2 separate occasions, at least 1 day apart, one of which is within 6 months of randomisation, lasting ≥30 seconds and documented by 12-lead ECG, rhythm strip, pacemaker/ICD electrogram or Holter monitor                                                                                                                              | AF or atrial flutter documented by ECG on enrolment; or AF or atrial flutter documented by ECG or as an episode lasting ≥1 minute on rhythm strip, Holter monitor, or intracardiac recording on 2 separate occasions at least 2 weeks apart in 12 months before enrolment | AF documented by ECG evidence (e.g. 12-lead ECG, rhythm strip, Holter monitor, or pacemaker interrogation) within 30 days of randomisation plus medical evidence (e.g. from medical chart, hospital discharge summary) of atrial fibrillation within 1 year before and at least one day before the qualifying ECG evidence. Subjects with newly diagnosed AF are eligible permitting: there is evidence that the AF is non-valvular; cardioversion is not planned; and there is ECG evidence on 2 occasions 24 hours apart demonstrating AF |
| Risk factors                                                                                    | At least 1 of: history of stroke, transient ischemic attack, or systemic embolism; ejection fraction ≤40% documented by ECG, radionuclide, or contrast angiogram in the last 6 months; symptomatic heart failure, age ≥75 years; OR age at least 65 years with at least one of: diabetes mellitus on treatment; documented coronary artery disease (prior MI, positive stress test, positive nuclear perfusion study, prior CABG surgery or PCI, angiogram showing at least 75% stenosis in a major coronary artery); hypertension requiring medical treatment | At least one of: history of stroke, transient ischemic attack, or systemic embolism; symptomatic heart failure; ejection fraction ≤40% documented by ECG, radionuclide, or contrast angiogram; age ≥75 years; diabetes mellitus; hypertension requiring medical treatment | History of stroke, TIA, or non-CNS systemic embolism; OR at least 2 of: heart failure and/or left ventricular fraction ≤35%; hypertension defined by use of antihypertensive within 6 months of screening visit or systolic blood pressure ≥140 mm Hg or diastolic blood pressure ≥90 mm Hg*; age ≥75 years; diabetes mellitus defined as history of type 1 or type 2 diabetes mellitus or use of antidiabetic medications within 6 months of screening visit                                                                               |
| <b>Exclusion</b>                                                                                |                                                                                                                                                                                                                                                                                                                                                                                                                                                                                                                                                                |                                                                                                                                                                                                                                                                           |                                                                                                                                                                                                                                                                                                                                                                                                                                                                                                                                             |
| Reversible causes of AF                                                                         | Reversible causes of AF (e.g. cardiac surgery, pulmonary embolism, or untreated hyperparathyroidism)                                                                                                                                                                                                                                                                                                                                                                                                                                                           | Reversible causes of AF (e.g. thyrotoxicosis or pericarditis)                                                                                                                                                                                                             | Reversible causes of AF (i.e. thyrotoxicosis)                                                                                                                                                                                                                                                                                                                                                                                                                                                                                               |
| Mitral valve stenosis                                                                           | -                                                                                                                                                                                                                                                                                                                                                                                                                                                                                                                                                              | Clinically significant moderate or severe mitral valve stenosis                                                                                                                                                                                                           | Haemodynamically significant mitral valve stenosis                                                                                                                                                                                                                                                                                                                                                                                                                                                                                          |
| Heart valve disorders and conditions other than AF that require chronic anticoagulant treatment | History of heart valve disorder (e.g. prosthetic valve or haemodynamically relevant valve disease); anticoagulant treatment for disorders other than AF                                                                                                                                                                                                                                                                                                                                                                                                        | Prosthetic mechanical heart valve; anticoagulant treatment for disorders other than AF                                                                                                                                                                                    | Prosthetic heart valve; anticoagulant treatment for disorders other than AF                                                                                                                                                                                                                                                                                                                                                                                                                                                                 |
| Recent stroke or TIA                                                                            | Severe, disabling stroke within 6 months, or any stroke within 14 days                                                                                                                                                                                                                                                                                                                                                                                                                                                                                         | Stroke within 7 days                                                                                                                                                                                                                                                      | Severe, disabling stroke within 3 months or any stroke within 14 days; TIA within 3 days                                                                                                                                                                                                                                                                                                                                                                                                                                                    |
| Concomitant conditions associated with increased risk of bleeding                               | Major surgery within one month; planned surgery or intervention within next three months; history of intracranial, intraocular, spinal,                                                                                                                                                                                                                                                                                                                                                                                                                        | Planned major surgery; platelet count ≤100,000/mm <sup>3</sup> ; uncontrolled hypertension (systolic blood pressure ≥180 mmHg and/or diastolic blood                                                                                                                      | Active internal bleeding; major surgical procedure or trauma within 30 days of randomisation; clinically significant GI bleeding within                                                                                                                                                                                                                                                                                                                                                                                                     |

| Criterion type                         | RE-LY                                                                                                                                                                                                                                                                                                                                                                                                                       | ARISTOTLE                                                                                                                                                                          | ROCKET-AF                                                                                                                                                                                                                                                                                                                                                                                                                                                                                                                                                                                           |
|----------------------------------------|-----------------------------------------------------------------------------------------------------------------------------------------------------------------------------------------------------------------------------------------------------------------------------------------------------------------------------------------------------------------------------------------------------------------------------|------------------------------------------------------------------------------------------------------------------------------------------------------------------------------------|-----------------------------------------------------------------------------------------------------------------------------------------------------------------------------------------------------------------------------------------------------------------------------------------------------------------------------------------------------------------------------------------------------------------------------------------------------------------------------------------------------------------------------------------------------------------------------------------------------|
|                                        | retroperitoneal or atraumatic intra-articular bleeding; GI haemorrhage within the past year; symptomatic or endoscopically documented gastroduodenal ulcer disease in the previous 30 days; haemorrhagic disorder; uncontrolled hypertension (systolic blood pressure $\geq 180$ mmHg and/or diastolic blood pressure $\geq 100$ mmHg); malignancy or radiation therapy within 6 months and not expected to survive 3 years | pressure $\geq 100$ mmHg)                                                                                                                                                          | six months of randomisation; history of intracranial, intraocular, spinal, or intra-articular bleeding; chronic haemorrhagic disorder; known intracranial neoplasm, arteriovenous malformation or aneurysm; planned invasive procedure with potential for uncontrolled bleeding; platelet count $< 90,000/\mu\text{L}$ at screening; uncontrolled hypertension (systolic blood pressure $\geq 180$ mmHg and/or diastolic blood pressure $\geq 100$ mmHg); malignancy or radiation therapy within 6 months and not expected to survive three years                                                   |
| Planned AF ablation procedure          | Planned AF ablation procedure                                                                                                                                                                                                                                                                                                                                                                                               | Planned AF ablation procedure                                                                                                                                                      | -                                                                                                                                                                                                                                                                                                                                                                                                                                                                                                                                                                                                   |
| Planned cardioversion                  | -                                                                                                                                                                                                                                                                                                                                                                                                                           | -                                                                                                                                                                                  | Planned cardioversion                                                                                                                                                                                                                                                                                                                                                                                                                                                                                                                                                                               |
| Renal impairment                       | Creatine clearance $\leq 30$ mL/minute                                                                                                                                                                                                                                                                                                                                                                                      | Creatine clearance $< 25$ mL/minute or serum creatine $< 2.5$ mg/dL                                                                                                                | Creatine clearance $< 30$ mL/minute                                                                                                                                                                                                                                                                                                                                                                                                                                                                                                                                                                 |
| Contraindication to warfarin treatment | Contraindication to warfarin treatment                                                                                                                                                                                                                                                                                                                                                                                      | -                                                                                                                                                                                  | Contraindication to warfarin treatment<br>Treatment with $> 100$ mg ASA daily; ASA in combination with thienopyridines within 5 days of randomisation; intravenous antiplatelets within 5 days of randomisation; fibrinolytic agents within 10 days of randomisation; anticipated need for chronic treatment with NSAID; systemic treatment with a strong inhibitor of cytochrome P450 3A4 within 4 days of randomisation or anticipated treatment during study; systemic treatment with strong inducer of cytochrome P450 3A4 within 4 days of randomisation or anticipated treatment during study |
| Concomitant treatments                 | Fibrinolytic agents within 48 hours of study entry; investigational drug within 30 days                                                                                                                                                                                                                                                                                                                                     | Treatment with $> 165$ mg ASA daily; ASA in combination with thienopyridines; investigational drug within 30 days                                                                  | Left ventricular thrombus; HIV infection; anemia at screening visit; pregnancy or breastfeeding; TIA within 3 days of randomisation; active endocarditis; known liver disease (e.g. acute clinical hepatitis, chronic active hepatitis, cirrhosis) or ALT $> 3$ ULN; severe comorbid condition with life expectancy $\leq 2$ years; substance abuse within 3 years of randomisation; psychosocial disorder                                                                                                                                                                                          |
| Other concomitant conditions           | Active liver disease (e.g. persistent ALT, AST, or ALP $> 2$ ULN; active hepatitis C; active hepatitis B; or active hepatitis A); anemia; pregnancy; active infection endocarditis; substance abuse disorder; life expectancy less than duration of trial; other conditions not allowing safe participation                                                                                                                 | ALT or AST $> 2$ ULN; total bilirubin $> 1.5$ ULN; haemoglobin level $< 9$ g/dL; pregnancy; severe comorbid condition with life expectancy $\leq 1$ year; substance abuse disorder |                                                                                                                                                                                                                                                                                                                                                                                                                                                                                                                                                                                                     |
| INR monitoring                         | -                                                                                                                                                                                                                                                                                                                                                                                                                           | Inability to comply with INR monitoring                                                                                                                                            | -                                                                                                                                                                                                                                                                                                                                                                                                                                                                                                                                                                                                   |

Source: <sup>1-3</sup> with clarification from <sup>4-6</sup>

\*There is a contradiction between the hypertension criterion defined in the supplementary appendix to the primary ROCKET-AF publication<sup>4</sup> and the ROCKET-AF rationale and design publication published by the ROCKET-AF trial investigators.<sup>2</sup> In this instance, the criterion from the supplementary appendix to the primary ROCKET-AF publication was used as it was deemed

more inclusive than the ROCKET-AF rationale and design publication.

AF: Atrial Fibrillation; ALP: Alkaline Phosphatase; ALT: Alanine Transaminase; ASA: acetylsalicylic acid; AST: Aspartate Transaminase; CABG: Coronary Artery Bypass Graft; ECG: Echocardiogram; GI: Gastrointestinal; HIV: Human Immunodeficiency Virus; MI: Myocardial Infarction; NSAID: Non-Steroidal Anti-Inflammatory Drug; PCI: Percutaneous Coronary Intervention; Transient Ischemic Attack; ULN: Upper Limit of Normal

## References

- 1 Ezekowitz MD, Connolly S, Parekh A, et al. Rationale and design of RE-LY: randomized evaluation of long-term anticoagulant therapy, warfarin, compared with dabigatran. *Am Heart J* 2009;**157**:805-10, 810.
- 2 Patel M. Rivaroxaban once-daily, oral, direct factor Xa inhibition compared with vitamin K antagonism for prevention of stroke and embolism trial in atrial fibrillation: rationale and design of the ROCKET AF study. *Am Heart J* 2010;**159**:340-7.
- 3 Lopes RD, Alexander JH, Al-Khatib SM, et al. Apixaban for reduction in stroke and other thromboembolic events in atrial fibrillation (ARISTOTLE) trial: design and rationale. *Am Heart J* 2010;**159**:331-9.
- 4 Patel MR, Mahaffey KW, Garg J, et al. Rivaroxaban versus warfarin in nonvalvular atrial fibrillation (with supplementary appendix). *New Engl J Med* 2011;**365**:883-91.
- 5 Granger CB, Alexander JH, McMurray JJV, et al. Apixaban versus warfarin in patients with atrial fibrillation (with supplementary appendix and study protocol). *New Engl J Med* 2011;**365**:981-92.
- 6 Connolly SJ, Ezekowitz MD, Yusuf S, et al. Dabigatran versus warfarin in patients with atrial fibrillation (with supplementary appendix). *N Engl J Med* 2009;**361**:1139-51.



**Representativeness of the dabigatran, apixaban, and rivaroxaban clinical trial populations to real-world atrial fibrillation patients in the United Kingdom:  
A cross-sectional analysis using the General Practice Research Database**

|                                 |                                                                                                                |
|---------------------------------|----------------------------------------------------------------------------------------------------------------|
| Journal:                        | <i>BMJ Open</i>                                                                                                |
| Manuscript ID:                  | bmjopen-2012-001768.R2                                                                                         |
| Article Type:                   | Research                                                                                                       |
| Date Submitted by the Author:   | 01-Nov-2012                                                                                                    |
| Complete List of Authors:       | Lee, Sally<br>Monz, Brigitta; Boehringer Ingelheim,<br>Clemens, Andreas<br>Brueckmann, Martina<br>Lip, Gregory |
| <b>Primary Subject Heading</b>: | Cardiovascular medicine                                                                                        |
| Secondary Subject Heading:      | Cardiovascular medicine                                                                                        |
| Keywords:                       | Thromboembolism < CARDIOLOGY, Stroke < NEUROLOGY, Stroke medicine < INTERNAL MEDICINE                          |
|                                 |                                                                                                                |

SCHOLARONE™  
Manuscripts

1  
2  
3  
4  
5 **Representativeness of the dabigatran, apixaban, and rivaroxaban clinical trial**  
6 **populations to real-world atrial fibrillation patients in the United Kingdom:**  
7 **A cross-sectional analysis using the General Practice Research Database**  
8  
9

10  
11 Sally Lee, PhD<sup>1</sup>, Brigitta U Monz, MD<sup>2</sup>, Andreas Clemens, MD<sup>3</sup>, Martina Brueckmann, MD<sup>3</sup>, Gregory YH  
12 Lip, MD<sup>4</sup>  
13

14 <sup>1</sup>Boehringer Ingelheim Ltd., UK

15  
16 <sup>2</sup>Boehringer Ingelheim GmbH, Ingelheim, Germany

17  
18 <sup>3</sup>Boehringer Ingelheim Pharma GmbH & Co. KG, Ingelheim, Germany

19  
20 <sup>4</sup>University of Birmingham Centre for Cardiovascular Sciences, City Hospital Birmingham, UK  
21  
22  
23

24 Corresponding Author:

25  
26 Name: Dr. Brigitta Monz, MD, MPH, MA Ethics in Medicine

27  
28 Address: Boehringer Ingelheim GmbH, Global Health Economics & Outcomes Research, Binger Str.  
29 173, 55216 Ingelheim am Rhein, Germany

30  
31 Email: [brigitta.monz@boehringer-ingelheim.com](mailto:brigitta.monz@boehringer-ingelheim.com)

32  
33 Fax: +49 (6132) 77 6146

34  
35 Telephone: +49 (6132) 7793362  
36  
37  
38  
39

40  
41 KEYWORDS: apixaban – atrial fibrillation – dabigatran – generalisibility – rivaroxaban  
42  
43

44  
45 WORD COUNT (excluding title page, abstract, references, and tables): 3990  
46  
47  
48  
49  
50  
51  
52  
53  
54  
55  
56  
57  
58  
59  
60

1  
2  
3  
4 **Abstract** Word count: 300  
5  
6

7 **Objective:** Three oral anticoagulants have reported study results for stroke prevention in patients  
8 with atrial fibrillation (AF) (dabigatran etexilate, rivaroxaban, apixaban); all demonstrated superiority  
9 or non-inferiority compared with warfarin (RE-LY, ARISTOTLE, ROCKET-AF). This study aimed to  
10 assess the representativeness for the real-world AF population, particularly the population eligible for  
11 anticoagulants.  
12  
13  
14  
15

16  
17 **Design:** A cross-sectional database analysis.  
18  
19

20 **Setting:** Dataset derived from the General Practice Research Database (GPRD).  
21  
22

23 **Primary and secondary outcomes measure:** The proportion of real-world patients with AF who  
24 met the inclusion/exclusion criteria for RE-LY, ARISTOTLE, and ROCKET-AF were compared. The  
25 results were then stratified by risk of stroke using CHADS<sub>2</sub> and CHA<sub>2</sub>DS<sub>2</sub>-VASc.  
26  
27  
28  
29

30 **Results:** 83,898 patients with AF were identified in the GPRD. For the population at intermediate or  
31 high risk of stroke and eligible for anticoagulant treatment (CHA<sub>2</sub>DS<sub>2</sub>-VASc  $\geq 1$ ; n=78,783 [94%]), the  
32 proportion eligible for inclusion into RE-LY (dabigatran etexilate) was 68% (95% CI:67.7%-68.3%;  
33 n=53,640), compared with 65% (95% CI:64.7%-65.3%; n=51,163) eligible for ARISTOTLE  
34 (apixaban) and 51% (95% CI:50.7%-51.4%; n=39,892) eligible for ROCKET-AF (rivaroxaban). Using  
35 the CHADS<sub>2</sub> method of risk stratification, for the population at intermediate or high risk of stroke and  
36 eligible for anticoagulation treatment (CHADS<sub>2</sub>  $\geq 1$ ; n=71,493 [85%]), the proportion eligible for  
37 inclusion into RE-LY was 74% (95% CI:73.7%-74.3%; n=52,783), compared with 72% (95%  
38 CI:71.7%-72.3%; n=51,415) for ARISTOTLE and 56% (95% CI:55.6%-56.4%; n=39,892) for  
39 ROCKET-AF.  
40  
41  
42  
43  
44  
45  
46  
47  
48  
49  
50  
51  
52  
53  
54  
55  
56  
57  
58  
59  
60



1  
2  
3 **Conclusions:** Patients enrolled within RE-LY and ARISTOTLE were more reflective of the 'real-world'  
4 AF population in the UK, in contrast to patients enrolled within ROCKET-AF who were a more  
5 narrowly-defined group of patients at higher risk of stroke. Differences between trials should be taken  
6 into account when considering the applicability of findings from randomised clinical trials. However,  
7 assessing representativeness is not a substitute for assessing generalisability, that is, how well clinical  
8 trial results would translate into effectiveness and safety in everyday routine care.  
9  
10  
11  
12  
13  
14  
15  
16  
17  
18  
19  
20  
21  
22  
23  
24  
25  
26  
27  
28  
29  
30  
31  
32  
33  
34  
35  
36  
37  
38  
39  
40  
41  
42  
43  
44  
45  
46  
47  
48  
49  
50  
51  
52  
53  
54  
55  
56  
57  
58  
59  
60

## Article summary

### Article focus

- The focus of this study was to assess the applicability of the findings of three randomised, controlled trials for stroke prevention in patients with atrial fibrillation (AF) to the real-world UK population of individuals with this condition, particularly to patients who would be eligible for anticoagulation under current guidelines.
- The three studies were RE-LY, ARISTOTLE and ROCKET-AF that investigated the efficacy and safety of dabigatran etexilate (dabigatran), apixaban and rivaroxaban compared to warfarin, respectively.

### Key messages

- Patients enrolled in RE-LY and ARISTOTLE were more reflective than patients enrolled in ROCKET-AF with respect to the real-world AF population in the UK, including the population eligible for anticoagulation.
- About 2/3 of patients recommended for anticoagulation would have been eligible to enrol into the clinical study investigating dabigatran (68%) or apixaban (65%) , but only about half of the patients would have been eligible for the rivaroxaban study (51%).
- Differences in representativeness should be taken into account when transferring study findings to patient populations in routine care.

### Strengths and limitations of this study

- The source population for this research, i.e. the General Practice Research Database (GPRD) is the largest primary care database in the world, containing the records of a representative sample of the British population.

- Operationalisation of the inclusion and exclusion criteria of the clinical studies in order to assess the eligibility for study enrolment of patients seen in routine care required in some instances assumptions.
- AF diagnosis in the GPRD may not always be accurate. However, the majority of AF cases were correctly coded according to a recent systematic review, and any errors would not be expected to systematically bias the findings of this research in favour of one study.
- Assessing representativeness cannot substitute for the assessment of generalisability, i.e. how well the clinical trial results translate into effectiveness and safety in routine care. This will need to be assessed once the drugs under study have been used for several years in daily practice.

## Background

Atrial fibrillation (AF) is the most common sustained cardiac arrhythmia, and is associated with an increased risk of stroke and other thromboembolic events. Approximately one in five of all strokes are caused by AF,<sup>1</sup> with the risk of stroke increased by four- to five-fold in patients with AF compared with the general population.<sup>2</sup> The condition is often asymptomatic,<sup>3</sup> but mortality in patients with chronic AF has been reported to be up to 2.5 times higher than in the general population, with the relative risk of death higher in women than in men.<sup>4</sup> The economic burden of AF is also high, with a key cost-driver being hospitalisation. This economic burden of AF has increased significantly over the last few decades, and is expected to increase even more in future due to aging populations.<sup>5</sup>

Oral anticoagulants form the current standard of care for patients with AF considered at intermediate to high risk of stroke, and are effective therapies for stroke prevention.<sup>1,3,6</sup> For many decades, warfarin was the only anticoagulant available; for now, three novel oral anticoagulant agents (dabigatran etexilate [later referred to as dabigatran], apixaban, and rivaroxaban) have demonstrated superiority or non-inferiority to warfarin with respect to the primary efficacy outcome of stroke or systemic embolism in Phase III randomised controlled trials.<sup>7-9</sup>

In RE-LY (n=18,113; ITT population), dabigatran at a dose of 150 mg twice daily was associated with a lower rate of stroke or systemic embolism (Relative Risk [RR], 95% Confidence Interval [CI]: 0.65, 0.52-0.81; p<0.001 for superiority) and did not significantly increase major bleeding (RR, 95% CI: 0.93, 0.81-1.07; p=0.32) when compared with warfarin. At a lower dose (110 mg, twice daily), dabigatran was associated with rates of stroke or systemic embolism that were similar to warfarin (RR, 95% CI: 0.90, 0.74-1.10; p<0.001 for non-inferiority) but significantly reduced major bleeding compared with warfarin (RR, 95% CI: 0.80, 0.70-0.93; p=0.003).<sup>7,10</sup> In ARISTOTLE (n=18,201; ITT population), apixaban (5 mg, twice daily) was associated with a lower rate of stroke or systemic embolism (Hazard Ratio [HR], 95% CI: 0.79, 0.66-0.95; p<0.001 for non-inferiority; p=0.01 for superiority) and reduced rates of major bleeding (HR, 95% CI: 0.69, 0.60-0.80; p<0.001) when compared with warfarin.<sup>9</sup> In ROCKET-AF (n=14,171; ITT population), rivaroxaban (20 mg, once daily) was associated with a similar rate of stroke or systemic embolism compared with warfarin (HR, 95%

1  
2  
3 CI: 0.88, 0.75-1.03;  $p < 0.001$  for non-inferiority,  $p = 0.12$  for superiority; ITT population) with no  
4 significant improvement in the rate of major bleeding (HR, 95% CI: 1.04, 0.90-1.20;  $p = 0.58$ , safety  
5 on treatment population).<sup>8</sup> Of these three anticoagulants, only dabigatran and rivaroxaban are  
6 currently approved in Europe for stroke prevention in patients with AF.<sup>11,12</sup>

7  
8  
9  
10  
11 Although these three RCTs have demonstrated that the three new anticoagulants are superior or non-  
12 inferior to warfarin in terms of stroke prevention, these studies applied specific inclusion and  
13 exclusion criteria that may have excluded patients who would otherwise be treated in real-life clinical  
14 practice, currently with warfarin. Therefore it is unknown whether the patient populations included in  
15 RE-LY, ARISTOTLE, and ROCKET-AF reflect 'real-world' patients with AF, and therefore whether the  
16 study results can be generalised to the wider patient population.

17  
18  
19  
20  
21  
22  
23  
24 To date there have been no studies comparing the eligibility criteria of these three trials. This study  
25 (RADAR: Representativeness and generalisability of the dabigatran, apixaban, and rivaroxaban clinical  
26 trial populations to real-world AF patients in the United Kingdom) aimed to assess the differences  
27 between the three trial populations of RE-LY, ARISTOTLE, and ROCKET-AF and the real-world  
28 patients with AF recorded within the General Practice Research Database (GPRD) in the United  
29 Kingdom (UK). An analysis on patients at intermediate- or high- risk of stroke allowed a focus on  
30 patients for whom, according to current clinical guidelines,<sup>1,3,6,13-15</sup> an anticoagulant could be  
31 prescribed. Risk of stroke is commonly assessed using stroke risk scores, such as the CHADS<sub>2</sub> score.<sup>16</sup>  
32 The CHA<sub>2</sub>DS<sub>2</sub>-VASc score has also been introduced and, based on multiple validation studies, is more  
33 accurate in identifying truly low-risk patients who do not require anticoagulation therapy and is at  
34 least as good as (possibly superior to) CHADS<sub>2</sub> in identifying high-risk patients who develop  
35 thrombembolism.<sup>16</sup> Both CHADS<sub>2</sub> and CHA<sub>2</sub>DS<sub>2</sub>-VASc scores were used to stratify patients in the  
36 current study. The CHA<sub>2</sub>DS<sub>2</sub>-VASc scoring became available after the three clinical studies had been  
37 initiated.

38  
39  
40  
41  
42  
43  
44  
45  
46  
47  
48  
49  
50  
51  
52  
53  
54  
55  
56  
57  
58  
59  
60  
61  
62  
63  
64  
65  
66  
67  
68  
69  
70  
71  
72  
73  
74  
75  
76  
77  
78  
79  
80  
81  
82  
83  
84  
85  
86  
87  
88  
89  
90  
91  
92  
93  
94  
95  
96  
97  
98  
99  
100  
101  
102  
103  
104  
105  
106  
107  
108  
109  
110  
111  
112  
113  
114  
115  
116  
117  
118  
119  
120  
121  
122  
123  
124  
125  
126  
127  
128  
129  
130  
131  
132  
133  
134  
135  
136  
137  
138  
139  
140  
141  
142  
143  
144  
145  
146  
147  
148  
149  
150  
151  
152  
153  
154  
155  
156  
157  
158  
159  
160  
161  
162  
163  
164  
165  
166  
167  
168  
169  
170  
171  
172  
173  
174  
175  
176  
177  
178  
179  
180  
181  
182  
183  
184  
185  
186  
187  
188  
189  
190  
191  
192  
193  
194  
195  
196  
197  
198  
199  
200  
201  
202  
203  
204  
205  
206  
207  
208  
209  
210  
211  
212  
213  
214  
215  
216  
217  
218  
219  
220  
221  
222  
223  
224  
225  
226  
227  
228  
229  
230  
231  
232  
233  
234  
235  
236  
237  
238  
239  
240  
241  
242  
243  
244  
245  
246  
247  
248  
249  
250  
251  
252  
253  
254  
255  
256  
257  
258  
259  
260  
261  
262  
263  
264  
265  
266  
267  
268  
269  
270  
271  
272  
273  
274  
275  
276  
277  
278  
279  
280  
281  
282  
283  
284  
285  
286  
287  
288  
289  
290  
291  
292  
293  
294  
295  
296  
297  
298  
299  
300  
301  
302  
303  
304  
305  
306  
307  
308  
309  
310  
311  
312  
313  
314  
315  
316  
317  
318  
319  
320  
321  
322  
323  
324  
325  
326  
327  
328  
329  
330  
331  
332  
333  
334  
335  
336  
337  
338  
339  
340  
341  
342  
343  
344  
345  
346  
347  
348  
349  
350  
351  
352  
353  
354  
355  
356  
357  
358  
359  
360  
361  
362  
363  
364  
365  
366  
367  
368  
369  
370  
371  
372  
373  
374  
375  
376  
377  
378  
379  
380  
381  
382  
383  
384  
385  
386  
387  
388  
389  
390  
391  
392  
393  
394  
395  
396  
397  
398  
399  
400  
401  
402  
403  
404  
405  
406  
407  
408  
409  
410  
411  
412  
413  
414  
415  
416  
417  
418  
419  
420  
421  
422  
423  
424  
425  
426  
427  
428  
429  
430  
431  
432  
433  
434  
435  
436  
437  
438  
439  
440  
441  
442  
443  
444  
445  
446  
447  
448  
449  
450  
451  
452  
453  
454  
455  
456  
457  
458  
459  
460  
461  
462  
463  
464  
465  
466  
467  
468  
469  
470  
471  
472  
473  
474  
475  
476  
477  
478  
479  
480  
481  
482  
483  
484  
485  
486  
487  
488  
489  
490  
491  
492  
493  
494  
495  
496  
497  
498  
499  
500  
501  
502  
503  
504  
505  
506  
507  
508  
509  
510  
511  
512  
513  
514  
515  
516  
517  
518  
519  
520  
521  
522  
523  
524  
525  
526  
527  
528  
529  
530  
531  
532  
533  
534  
535  
536  
537  
538  
539  
540  
541  
542  
543  
544  
545  
546  
547  
548  
549  
550  
551  
552  
553  
554  
555  
556  
557  
558  
559  
560  
561  
562  
563  
564  
565  
566  
567  
568  
569  
570  
571  
572  
573  
574  
575  
576  
577  
578  
579  
580  
581  
582  
583  
584  
585  
586  
587  
588  
589  
590  
591  
592  
593  
594  
595  
596  
597  
598  
599  
600  
601  
602  
603  
604  
605  
606  
607  
608  
609  
610  
611  
612  
613  
614  
615  
616  
617  
618  
619  
620  
621  
622  
623  
624  
625  
626  
627  
628  
629  
630  
631  
632  
633  
634  
635  
636  
637  
638  
639  
640  
641  
642  
643  
644  
645  
646  
647  
648  
649  
650  
651  
652  
653  
654  
655  
656  
657  
658  
659  
660  
661  
662  
663  
664  
665  
666  
667  
668  
669  
670  
671  
672  
673  
674  
675  
676  
677  
678  
679  
680  
681  
682  
683  
684  
685  
686  
687  
688  
689  
690  
691  
692  
693  
694  
695  
696  
697  
698  
699  
700  
701  
702  
703  
704  
705  
706  
707  
708  
709  
710  
711  
712  
713  
714  
715  
716  
717  
718  
719  
720  
721  
722  
723  
724  
725  
726  
727  
728  
729  
730  
731  
732  
733  
734  
735  
736  
737  
738  
739  
740  
741  
742  
743  
744  
745  
746  
747  
748  
749  
750  
751  
752  
753  
754  
755  
756  
757  
758  
759  
760  
761  
762  
763  
764  
765  
766  
767  
768  
769  
770  
771  
772  
773  
774  
775  
776  
777  
778  
779  
780  
781  
782  
783  
784  
785  
786  
787  
788  
789  
790  
791  
792  
793  
794  
795  
796  
797  
798  
799  
800  
801  
802  
803  
804  
805  
806  
807  
808  
809  
810  
811  
812  
813  
814  
815  
816  
817  
818  
819  
820  
821  
822  
823  
824  
825  
826  
827  
828  
829  
830  
831  
832  
833  
834  
835  
836  
837  
838  
839  
840  
841  
842  
843  
844  
845  
846  
847  
848  
849  
850  
851  
852  
853  
854  
855  
856  
857  
858  
859  
860  
861  
862  
863  
864  
865  
866  
867  
868  
869  
870  
871  
872  
873  
874  
875  
876  
877  
878  
879  
880  
881  
882  
883  
884  
885  
886  
887  
888  
889  
890  
891  
892  
893  
894  
895  
896  
897  
898  
899  
900  
901  
902  
903  
904  
905  
906  
907  
908  
909  
910  
911  
912  
913  
914  
915  
916  
917  
918  
919  
920  
921  
922  
923  
924  
925  
926  
927  
928  
929  
930  
931  
932  
933  
934  
935  
936  
937  
938  
939  
940  
941  
942  
943  
944  
945  
946  
947  
948  
949  
950  
951  
952  
953  
954  
955  
956  
957  
958  
959  
960  
961  
962  
963  
964  
965  
966  
967  
968  
969  
970  
971  
972  
973  
974  
975  
976  
977  
978  
979  
980  
981  
982  
983  
984  
985  
986  
987  
988  
989  
990  
991  
992  
993  
994  
995  
996  
997  
998  
999  
1000

It was hypothesised that the trial populations within RE-LY, ROCKET-AF, and ARISTOTLE, as selected  
by the trial protocol inclusion and exclusion criteria, would vary in their representativeness to real-  
world AF populations, particularly for those eligible for anticoagulant treatment based on current

1  
2  
3 guidelines.  
4  
5  
6  
7  
8  
9  
10  
11  
12  
13  
14  
15  
16  
17  
18  
19  
20  
21  
22  
23  
24  
25  
26  
27  
28  
29  
30  
31  
32  
33  
34  
35  
36  
37  
38  
39  
40  
41  
42  
43  
44  
45  
46  
47  
48  
49  
50  
51  
52  
53  
54  
55  
56  
57  
58  
59  
60

For peer review only

## Design

### Objectives

The objective of this study was to assess the representativeness of RE-LY, ARISTOTLE, and ROCKET-AF to the real-world AF population in the UK. The study design was a cross-sectional database analysis.

### Data source

The GPRD was used as a source of information on the general AF population. In the UK, patients are semi-permanently registered at a specific practice where General Practitioners (GPs) provide primary care and make specialist referrals. These practices centralize the medical information from the GPs themselves, and also information from the specialist referrals and hospitalisations.<sup>17</sup> The GPRD is a computerised database comprising anonymous medical records from over 630 practices in the UK, covering approximately 8% of the UK population.<sup>18</sup> The database contains longitudinal data on patient demographics, diagnoses, referrals, prescribing, and health outcomes and has a geographical distribution that is representative of the UK population.<sup>19</sup> The median proportion of diagnoses correctly coded by the GPRD was recently demonstrated to be 89% (range 24% to 100%) in a systematic literature review of GPRD studies.<sup>20</sup> The GPRD has obtained ethical approval from a Multicentre Research Ethics Committee for all purely observational research using GPRD data; specifically, studies which do not include patient involvement.<sup>21</sup>

### Population

Patients from the GPRD were included if they had a diagnosis of non-valvular AF, were still alive and registered with a GP practice on the 31<sup>st</sup> March 2008, and were aged  $\geq 18$  years of age. An artificial start date was defined for 31<sup>st</sup> March 2008 to allow sufficient time for the application of prospective exclusion criteria, such as 'clinically significant GI bleeding within six months of randomisation'.

### Inclusion/exclusion criteria

The inclusion/exclusion criteria from RE-LY, ROCKET-AF, and ARISTOTLE were derived primarily from the trial design and rationale publications,<sup>22-24</sup> with clarification sought from supplementary appendices and primary clinical trial result publications<sup>7-9</sup> where required. A full description of the inclusion and exclusion criteria applied is provided in the Supplementary Material. Of note, the ROCKET-AF trial required patients to have a history of stroke, TIA, or systemic embolism (i.e. secondary prevention cohort) or had to have *two* of the following: age  $\geq 75$  years, congestive heart failure or ejection fraction  $\leq 35\%$ , diabetes, or hypertension.

With respect to the ROCKET-AF trial, there was a contradiction between the hypertension risk factor inclusion criterion described in the ROCKET-AF rationale and design publication (systolic blood pressure  $\geq 180$  mmHg or diastolic blood pressure  $\geq 100$  mmHg)<sup>22</sup> and in the supplementary appendix of the results publication (use of antihypertensives within 6 months before screening or persistent systolic blood pressure  $> 140$  mmHg or persistent diastolic blood pressure  $> 90$  mmHg)<sup>8</sup>. In the current analysis the more inclusive criterion from the supplementary appendix has been used in place of the trial design publication.

The inclusion/exclusion criteria were then used to identify the total number of patients with AF in the GPRD who would meet the trial eligibility criteria. READ codes were used as the principal method of identifying patients from the GPRD who would meet the trial inclusion/exclusion criteria. READ codes are a coded thesaurus of clinical terms and form the basic means through which physicians record patient findings and interventions in health and social care IT systems within the UK.<sup>25</sup> Prescription data were also used to identify patients prescribed medications that may have affected their eligibility for one or more of the trials (e.g. long term non-steroidal anti-inflammatory drug usage), and test results were used to identify patients meeting criterion (e.g. abnormal platelet and haemoglobin levels) forming part of the exclusion criteria for the trials.

The CHADS<sub>2</sub> and CHA<sub>2</sub>DS<sub>2</sub>-VASc scores were then used to stratify patients from the GPRD by risk of stroke (low, medium, and high). CHADS<sub>2</sub> assigns one point to patients for chronic heart failure, hypertension, age  $\geq 75$  years, and/or diabetes, and two points for history of stroke or transient



1  
2  
3 ischemic attack (TIA). A score of 1 indicates an intermediate risk of stroke, a score of  $\geq 2$  indicates a  
4 high risk of stroke.<sup>3</sup> In contrast, CHA<sub>2</sub>DS<sub>2</sub>-VASc assigns one point for congestive heart failure,  
5 hypertension, diabetes, vascular disease, female gender, and/or age 65-74 years, and two points for  
6 history of stroke or TIA and/or age  $\geq 75$  years.<sup>16</sup> As with CHADS<sub>2</sub>, a score of 1 on the CHA<sub>2</sub>DS<sub>2</sub>-VASc  
7 indicates an intermediate risk of stroke, and a score of  $\geq 2$  indicates a high risk of stroke.<sup>16</sup>  
8  
9  
10  
11  
12

### 13 **Outcomes**

14  
15  
16 The outcomes of interest were the proportion of real-world patients with AF in the GPRD who would  
17 meet the inclusion/exclusion criteria for each of the three trials (RE-LY, ARISTOTLE, and ROCKET-AF),  
18 as well as the proportion of real-world patients with AF classified at intermediate or high risk of stroke  
19 who would meet the respective inclusion/exclusion criteria, stratified by the risk of stroke according to  
20 both the CHADS<sub>2</sub> and the CHA<sub>2</sub>DS<sub>2</sub>-VASc. The specific inclusion and exclusion criteria for each of the  
21 three trials were also examined to determine if there were key criteria causing differences between  
22 trials.  
23  
24  
25  
26  
27  
28  
29  
30

### 31 **Statistical Analysis**

32  
33  
34 The proportion of patients from the GPRD who would be eligible for RE-LY was compared with the  
35 proportion that would be eligible for ARISTOTLE and ROCKET-AF using the Chi-squared test at a  
36 significance level of 5%. All analyses are descriptive and exploratory.  
37  
38  
39  
40  
41  
42  
43  
44  
45  
46  
47  
48  
49  
50  
51  
52  
53  
54  
55  
56  
57  
58  
59  
60

## Results

### Patients eligible for RE-LY, ARISTOTLE, and ROCKET-AF

In total, 83,898 patients with AF were identified from the GPRD (Table 1). Of these patients, 64% met the inclusion/exclusion criteria for enrolment into RE-LY. This compares with 61% of patients who were eligible for inclusion into ARISTOTLE and 48% of patients who were eligible for inclusion into ROCKET-AF. The proportion of real-world patients who would be eligible for inclusion within the RE-LY trial was statistically significantly higher than the proportion of real-world patients who would be eligible for ARISTOTLE or ROCKET-AF ( $p < 0.001$  for both comparisons), though the small difference against ARISTOTLE is probably not clinically meaningful.

### Intermediate- and high-risk patients eligible for RE-LY, ARISTOTLE, and ROCKET-AF

In clinical practice, only patients considered at intermediate or high risk of stroke would receive anticoagulation therapy. Using the CHADS<sub>2</sub> score, 71,493 (85%) patients from the total GPRD AF population would be eligible for anticoagulant therapy, of which 74% would meet the RE-LY inclusion/exclusion criteria, 72% would meet the ARISTOTLE criteria, and 56% would meet the ROCKET-AF criteria (Table 1). Using the CHA<sub>2</sub>DS<sub>2</sub>-VASc score, 78,783 (94%) patients from the total GPRD population would be eligible for anticoagulant therapy, of which 68% would meet the RE-LY inclusion/exclusion criteria, 65% would meet the ARISTOTLE criteria, and 51% would meet the ROCKET-AF criteria (Table 1).

### Eligibility by individual inclusion and exclusion criterion

The inclusion rather than exclusion criteria were the primary determinants for the trial population in RE-LY (77% of GPRD AF population eligible), ARISTOTLE (81% of GPRD AF population eligible), and ROCKET-AF (63% of GPRD AF population eligible), as would be expected (Table 2). Within the inclusion criteria, the greatest difference between trials was seen with the hypertension definition, where 81% of the GPRD AF population met this criterion in ROCKET-AF, compared to 59% of real-world patients for the RE-LY and ARISTOTLE hypertension criteria (Table 2). This difference, which favours ROCKET-AF over RE-LY and ARISTOTLE with respect to inclusivity, did not appear to be a

1  
2  
3 major driver for differences in overall inclusion eligibility for the trials. Instead, the differences in  
4 inclusion eligibility were not driven by an individual inclusion criterion, but by the different  
5 combinations of individual inclusion criteria within the trials.  
6  
7

8  
9 For the exclusion criteria specifically, the requirement for anticoagulant treatment for conditions other  
10 than AF excluded 6% of GPRD patients with AF from all trials, with renal impairment excluding a  
11 further 3% of the GPRD AF population. Although the exclusion criteria differed between trials, none of  
12 the individual criteria appear to be a key driver of the different proportions of real-world patients  
13 eligible for the trials (Table 2).  
14  
15  
16  
17  
18  
19  
20  
21  
22  
23  
24  
25  
26  
27  
28  
29  
30  
31  
32  
33  
34  
35  
36  
37  
38  
39  
40  
41  
42  
43  
44  
45  
46  
47  
48  
49  
50  
51  
52  
53  
54  
55  
56  
57  
58  
59  
60

## Discussion

The results of this analysis demonstrate that the warfarin-controlled pivotal trials for the novel oral anticoagulants dabigatran (RE-LY), apixaban (ARISTOTLE), and rivaroxaban (ROCKET-AF) vary in their representativeness of the AF population enrolled. Based on GPRD, the RE-LY trial enrolled a patient population that is most closely matched to patients with AF seen in general practice within the UK compared to the populations enrolled according to the exclusion/inclusion criteria for the other trials. Overall, 68% of intermediate- or high-risk patients with AF captured within the GPRD would be eligible for inclusion into RE-LY, as compared with 65% and 51% for ARISTOTLE and ROCKET-AF respectively (as categorised by  $CHA_2DS_2-VASc \geq 1$ ). Being more inclusive and representative of the general AF population allows trial findings to be more readily generalised to patients seen in everyday clinical practice (and eligible for anticoagulant therapy). The RE-LY patient population is also slightly more inclusive of AF patients eligible for anticoagulant treatment, than the population in the ARISTOTLE trial (difference of 3%;  $p < 0.001$ ) but this statistically significant difference between the RE-LY and ARISTOTLE populations would not necessarily translate into clinically meaningful differences for the real-world population.

It is important to note that a higher risk patient population was intentionally enrolled in ROCKET-AF (mean  $CHADS_2$  risk score of 3.48) compared with both the RE-LY (mean  $CHADS_2$  risk score of 2.1) and ARISTOTLE (mean  $CHADS_2$  risk score of 2.2) trials, and thus, a large number of patients who would be eligible for anticoagulant treatment under current guidelines would not have been entered into ROCKET-AF. Indeed, there are no data for patients with a  $CHADS_2$  score 0-1 in ROCKET-AF, and only 13% of this trial population had a  $CHADS_2$  score of 2.<sup>8</sup> A significant number of patients who could be eligible for anticoagulation in general practice (intermediate or high risk of stroke according to the  $CHADS_2$  risk score) and who would be included within RE-LY are excluded from ROCKET-AF (18%). In total, 13,748 patients with AF eligible for the RE-LY study would have been excluded from the ROCKET-AF trial within the total GPRD AF population (low, intermediate, or high risk of stroke). Thus, some care should be taken when generalizing the trial results from the high risk subpopulation seen in ROCKET-AF to the general AF population encountered in clinical practice.

1  
2  
3 Trial generalisability (external validity) is a recognised problem in randomised controlled trials. The  
4 trial participants enrolled in a trial may differ considerably from the target population/clinical practice  
5 in which the trial's findings are later used, and trial eligibility criteria can contribute to this lack of  
6 generalisability.<sup>26</sup> The current analysis indicates that the rate of inclusion observed within the RE-LY  
7 trial (and probably, ARISTOTLE) is at least as representative of the general population as other  
8 pivotal trials have been found to be. For example, a recent analysis of patients enrolled in eight  
9 placebo controlled clinical trials for amyotrophic lateral sclerosis (ALS) found that 66% of patients  
10 diagnosed with ALS in Italy between 2003 and 2008 met the eligibility criteria for the trials.<sup>27</sup>  
11 However, this analysis reported that the ALS patients enrolled within the clinical trials were  
12 demographically and clinically different from the patients within the national ALS population, with the  
13 differences between the trial cohorts and patient population resulting in part from the different  
14 eligibility criteria used and in part from factors unrelated to enrolment criteria. With respect to risk of  
15 stroke as determined by CHADS<sub>2</sub> score, 26% of individuals in a study of the incidence and prevalence  
16 of chronic AF in the UK (using also the GPRD as a data source), had a CHADS<sub>2</sub> score of  $\geq 3$ ,<sup>17</sup>  
17 compared with 33% in RE-LY,<sup>7</sup> 32% in ARISTOTLE,<sup>9</sup> and 87% in ROCKET-AF.<sup>8</sup> This demonstrates  
18 that both RE-LY and ARISTOTLE were substantially more reflective of the real-world AF population  
19 (based on the GPRD) than ROCKET-AF when considering the proportion of the population at differing  
20 risk of stroke. It is interesting to note that little research has actually been conducted to quantify the  
21 representativeness of trial populations with regards to real life populations. This is surprising given  
22 that the external validity of trials is always questioned, especially in the context of reimbursement  
23 decisions and Health Technology Assessments (HTA). More systematic research in this area appears  
24 to be warranted, particularly with respect to how the external validity of a trial then affects the  
25 'translation' of efficacy to effectiveness.

26  
27  
28  
29  
30  
31  
32  
33  
34  
35  
36  
37  
38  
39  
40  
41  
42  
43  
44  
45  
46  
47  
48  
49 When classifying patient risk, risk groups stratified by the CHA<sub>2</sub>DS<sub>2</sub>-VASc score may be considered to  
50 be more accurate than those stratified by CHADS<sub>2</sub>, particularly to identify 'truly low risk' patients who  
51 do not need any antithrombotic therapy, due to the more inclusive nature of common stroke risk  
52 factors in CHA<sub>2</sub>DS<sub>2</sub>-VASc.<sup>16</sup> This is important when considering the results of the current study, since  
53 the intermediate or high risk population by CHA<sub>2</sub>DS<sub>2</sub>-VASc included 7,290 more patients than did the  
54  
55  
56  
57  
58  
59  
60

1  
2  
3 intermediate or high risk population by CHADS<sub>2</sub>. These patients are at risk of stroke but may not  
4 receive treatment if miscategorised as low risk by the CHADS<sub>2</sub> score; indeed, one recent analysis  
5 suggests that a CHADS<sub>2</sub> score=0 is not low risk with stroke rates that can range between 0.8% per  
6 year to 3.2% per year when subdivided by CHA<sub>2</sub>DS<sub>2</sub>-VASc score.<sup>28</sup> The 2010 ESC guidelines suggest  
7 that although CHADS<sub>2</sub> is useful as a simple initial means of assessing risk, patients scoring 0 or 1  
8 should undergo more comprehensive assessment, for example with CHA<sub>2</sub>DS<sub>2</sub>-VASc.<sup>1</sup> In the 2012  
9 focussed update of the ESC guidelines, the only recommended stroke risk score is CHA<sub>2</sub>DS<sub>2</sub>-VASc,  
10 with the initial focus on identification 'truly low risk' patients (that is, age <65 and lone AF, or  
11 CHA<sub>2</sub>DS<sub>2</sub>-VASc=0) who do not need any antithrombotic therapy. Those with ≥1 stroke risk factors  
12 can be offered effective stroke prevention, which is oral anticoagulation.<sup>29</sup>

### 23 24 25 26 **Limitations**

27  
28  
29 It should be noted that a number of the criteria included in the trial design for RE-LY, ARISTOTLE,  
30 and ROCKET-AF were not recorded in the GPRD or were difficult to extract. For example, planned  
31 major surgery would not be captured within the database, nor would a life expectancy of less than 1  
32 year, both of which are exclusion criteria in one or more of the trials. However, these criteria were  
33 likely to have had minimal impact on the final populations included within the RCTs, since many of  
34 the criteria that could not be applied to the GPRD population were consistent across all three trials.  
35 This means that the impact of applying the individual criterion would be the same across RE-LY,  
36 ARISTOTLE, and ROCKET-AF, with only the order of magnitude affected. A potential limitation of the  
37 current study is that the analyses were reliant on the quality of GP coding in the GPRD dataset. A  
38 recent systematic review of the validity of diagnostic coding in the GPRD reported that >80% of  
39 events such as myocardial infarction and stroke were correctly coded, but a lower proportion (64.4%)  
40 of AF cases were correctly coded.<sup>30</sup> This means that there may be some error in the characteristics of  
41 the GPRD population taken to be a reflection of the general AF population in the UK. However, this is  
42 unlikely to affect the conclusion drawn from the current study, since the errors in coding are unlikely  
43 to be focused on a specific subgroup of patients and instead would be expected to be distributed

1  
2  
3 across the whole AF population in the UK. Although the total number of patients classified as having  
4 AF in the GPRD may be lower than the total number of patients with AF in the UK, there is no reason  
5 to suspect that the patients miscoded would have systematically differed in characteristics to those  
6 correctly coded within the database.  
7  
8  
9

10  
11  
12  
13 In order to answer the question of generalisability, it would be necessary to compare clinical trial  
14 results with effectiveness and safety findings observed in routine care. However, to undertake such  
15 real-life assessments typically takes several years as the drugs in question need to become used  
16 widely. Therefore, Health Technology Assessment (HTA) bodies (such as NICE in the UK) often  
17 request that evidence is presented to what extent a trial population is reflective of the population for  
18 which the coverage decision has to be taken and for which the drug is likely to be used in routine  
19 practice. If a study population is very different from the one for which the drug will be used in routine  
20 care, this will increase the uncertainty in such HTA decisions. Such assessment as ours therefore can  
21 serve as a first indication of generalisability. A further limitation is that other study factors that can  
22 influence generalisability have not been investigated in this research, such as the countries  
23 participating in the studies or the quality of the warfarin arm as an indicator for the quality of patient  
24 care<sup>31</sup>.  
25  
26  
27  
28  
29  
30  
31  
32  
33  
34  
35  
36  
37

## 38 **Conclusion**

39  
40  
41 Trial generalisability is an important consideration for the National Institute of Health and Clinical  
42 Excellence (NICE) in the UK and other such HTA bodies, with past criticisms focusing on the lack of  
43 generalisability of trials as a result of the eligibility criteria applied.<sup>32-34</sup> The current analysis  
44 demonstrates that the data from RE-LY and ARISTOTLE are applicable to a larger proportion of real-  
45 world AF patients than data from ROCKET-AF, meaning that the results from the study supporting the  
46 use of dabigatran and apixaban are more generalizable to the general anticoagulant eligible AF  
47 population.  
48  
49  
50  
51  
52  
53  
54  
55  
56  
57  
58  
59  
60

## Acknowledgements

With thanks to James Cann and Ebony Samuels at HERON Evidence Development for contributing to the preparation of the initial draft manuscript.

## Funding source

The study was funded by Boehringer Ingelheim International GmbH.

## Author contributions

SL was responsible for study design, data extraction, and statistical analysis; BM, AC, MB, and GL contributed to study concept, design, and data interpretation. All authors reviewed and significantly contributed to the initial draft manuscript and approved the final submitted version.

## Conflict of interest

SL, BM, AC, and MB are employees of Boehringer Ingelheim, the manufacturer of dabigatran. GYHL has served as a consultant for Bayer, Astellas, Merck, Sanofi, BMS/Pfizer, Daiichi-Sankyo, Biotronik, Portola and Boehringer Ingelheim and has been on the speakers' bureau for Bayer, BMS/Pfizer, Boehringer Ingelheim, and Sanofi Aventis.

## Data Sharing Statement

There is no additional data available



## References

- 1 Camm AJ, Kirchhof P, Lip GYH, et al. Guidelines for the management of atrial fibrillation: the Task Force for the Management of Atrial Fibrillation of the European Society of Cardiology. *Eur Heart J* 2010;**31**:2369-429.
- 2 Wolf PA, Abbott RD, Kannel WB. Atrial fibrillation as an independent risk factor for stroke: the Framingham Study. *Stroke* 1991;**22**:983-8.
- 3 National Collaborating Centre for Chronic Conditions. Atrial fibrillation: national clinical guidelines for management in primary and secondary care. London: Royal College of Physicians; 2006.
- 4 Ruigomez A, Johansson S, Wallander MA, et al. Risk of mortality in a cohort of patients newly diagnosed with chronic atrial fibrillation. *BMC Cardiovasc Disord* 2002;**2**:5.
- 5 Wolowacz SE, Samuel M, Brennan VK, et al. The cost of illness of atrial fibrillation: a systematic review of the recent literature. *Europace* 2011;**13**:1375-85.
- 6 Fuster V, Ryden LE, Cannom DS, et al. ACC/AHA/ESC 2006 Guidelines for the management of patients with atrial fibrillation: a report of the American College of Cardiology/American Heart Association Task Force on Practice Guidelines and the European Society of Cardiology Committee for Practice Guidelines (Writing Committee to Revise the 2001 Guidelines for the Management of Patients With Atrial Fibrillation). *Circulation* 2006;**114**:e257-e354.
- 7 Connolly SJ, Ezekowitz MD, Yusuf S, et al. Dabigatran versus warfarin in patients with atrial fibrillation (with supplementary appendix). *N Engl J Med* 2009;**361**:1139-51.
- 8 Patel MR, Mahaffey KW, Garg J, et al. Rivaroxaban versus warfarin in nonvalvular atrial fibrillation (with supplementary appendix). *New Engl J Med* 2011;**365**:883-91.
- 9 Granger CB, Alexander JH, McMurray JJV, et al. Apixaban versus warfarin in patients with atrial fibrillation (including supplementary appendix and study protocol). *New Engl J Med* 2011;**365**:981-92.
- 10 Connolly SJ, Ezekowitz MD, Yusuf S, et al. Newly identified events in the RE-LY trial. *New Engl J Med* 2010;**363**:1875-6.
- 11 Boehringer Ingelheim. Pradaxa 150 mg: summary of product characteristics. emc 2011 August 18 [cited 2011 Nov 8];Available from: URL: <http://www.medicines.org.uk/EMC/medicine/24839/SPC/Pradaxa+150+mg+hard+capsules/>
- 12 Bayer plc. Xarelto 20mg film-coated tablets. emc 2011 [cited 2012 Feb 13];Available from: URL: <http://www.medicines.org.uk/EMC/medicine/25586/SPC/Xarelto+20mg+film-coated+tablets/>
- 13 Wann LS, Curtis AB, Ellenbogen KA, et al. 2011 ACCF/AHA/HRS focused update on the management of patients with atrial fibrillation (update on dabigatran). A report of the American College of Cardiology Foundation/American Heart Association Task Force on Practice Guidelines. *Heart Rhythm* 2011;**8**:e1-e8.

- 1  
2  
3 14 You JJ, Singer DE, Howard PA, et al. Antithrombotic therapy for atrial fibrillation: Antithrombotic  
4 Therapy and Prevention of Thrombosis, 9th ed: American College of Chest Physicians Evidence-  
5 Based Clinical Practice Guidelines. *Chest* 2012;**141**:e531S-e575S.  
6  
7 15 Skanes AC, Healey JS, Cairns JA, et al. Focused 2012 update of the Canadian Cardiovascular  
8 Society atrial fibrillation guidelines: recommendations for stroke prevention and rate/rhythm  
9 control. *Can J Cardiol* 2012;**28**:125-36.  
10  
11 16 Lip GYH, Nieuwlaat R, Pisters R, et al. Refining clinical risk stratification for predicting stroke  
12 and thromboembolism in atrial fibrillation using a novel risk factor-based approach: the Euro  
13 heart survey on atrial fibrillation. *Chest* 2010;**137**:263-72.  
14  
15 17 Rietbrock S, Heeley E, Plumb J, et al. Chronic atrial fibrillation: incidence, prevalence, and  
16 prediction of stroke using the Congestive heart failure, Hypertension, Age >75, Diabetes  
17 mellitus, and prior Stroke or transient ischemic attack (CHADS2) risk stratification scheme. *Am*  
18 *Heart J* 2008;**156**:57-64.  
19  
20 18 General Practice Research Database. The database. Medicines and Healthcare products  
21 Regulatory Agency 2011 [cited 2011 Nov 2];Available from: URL:  
22 <http://www.gprd.com/products/database.asp>  
23  
24 19 Garcia Rodriguez LA, Perez Gutthann S. Use of the UK General Practice Research Database for  
25 pharmacoepidemiology. *Br J Clin Pharmacology* 1998;**45**:419-25.  
26  
27 20 Herrett E, Thomas SL, Schoonen WM, et al. Validation and validity of diagnoses in the General  
28 Practice Research Database: a systematic review. *Br J Clin Pharmacology* 2010;**69**:4-14.  
29  
30 21 General Practice Research Database. Ethical review for GPRD protocols. Medicines and  
31 Healthcare products Regulatory Agency 2012 [cited 2012 Jan 26];Available from: URL:  
32 <http://www.gprd.com/isac/#ethicalReview>  
33  
34 22 Patel M. Rivaroxaban once-daily, oral, direct factor Xa inhibition compared with vitamin K  
35 antagonism for prevention of stroke and embolism trial in atrial fibrillation: rationale and design  
36 of the ROCKET AF study. *Am Heart J* 2010;**159**:340-7.  
37  
38 23 Lopes RD, Alexander JH, Al-Khatib SM, et al. Apixaban for reduction in stroke and other  
39 thromboembolic events in atrial fibrillation (ARISTOTLE) trial: design and rationale. *Am Heart J*  
40 2010;**159**:331-9.  
41  
42 24 Ezekowitz MD, Connolly S, Parekh A, et al. Rationale and design of RE-LY: randomized  
43 evaluation of long-term anticoagulant therapy, warfarin, compared with dabigatran. *Am Heart J*  
44 2009;**157**:805-10, 810.  
45  
46 25 National Health Service. READ codes. NHS Connecting for Health 2011 [cited 2011 Dec  
47 14];Available from: URL:  
48 <http://www.connectingforhealth.nhs.uk/systemsandservices/data/uktc/readcodes>  
49  
50 26 Weiss NS, Koepsell TD, Psaty BM. Generalizability of the results of randomized trials. *Arch*  
51 *Intern Med* 2008;**168**:133-5.  
52  
53  
54  
55  
56  
57  
58  
59  
60

- 1  
2  
3 27 Chio A, Canosa A, Gallo S, et al. ALS clinical trials: do enrolled patients accurately represent the  
4 ALS population? *Neurology* 2011;**77**:1432-7.  
5  
6 28 Olesen JB, Torp-Pedersen C, Hansen ML, et al. The value of the CHA2DS2-VASc score for  
7 refining stroke risk stratification in patients with atrial fibrillation with a CHADS2 score 0-1: A  
8 nationwide cohort study. *Thromb Haemost* 2012;**107**:1172-9.  
9  
10 29 Camm AJ, Lip GYH, De Caterina R, et al. 2012 focused update of the ESC Guidelines  
11 for the management of atrial fibrillation. An update of the 2010 ESC Guidelines for the  
12 management of atrial fibrillation. *Eur Heart J*. 2012 Aug 24. [Epub ahead of print]  
13  
14 30 Khan N, Harrison S, Rose P. Validity of diagnostic coding within the General Practice Research  
15 Database: a systematic review. *Br J Gen Pract* 2011;**60**:e128-e136.  
16  
17 31 Fleming TR, Emerson SS. Evaluating rivaroxaban for nonvalvular atrial fibrillation--regulatory  
18 considerations. *N Engl J Med*. 2011 Oct 27;365(17):1557-9.  
19  
20 32 Burns T. NICE guidance in schizophrenia: how generalisable are drug trials? *The Psychiatrist*  
21 2006;**30**:210-2.  
22  
23 33 National Institute for Health and Clinical Excellence. Erlotinib monotherapy for maintenance  
24 treatment of non-small-cell lung cancer. 2011. Report No.: TA227.  
25  
26 34 National Institute for Health and Clinical Excellence. Dronedarone for the treatment of non-  
27 permanent atrial fibrillation. 2010. Report No.: TA197.  
28  
29  
30  
31  
32  
33  
34  
35  
36  
37  
38  
39  
40  
41  
42  
43  
44  
45  
46  
47  
48  
49  
50  
51  
52  
53  
54  
55  
56  
57  
58  
59  
60

## Tables

**Table 1: Proportion of GPRD AF patients who met inclusion/exclusion criteria for RE-LY, ARISTOTLE, and ROCKET-AF, stratified by risk of stroke and assessment method**

| Patient population                         | Anticoagulant eligibility                                                                                          | GPRD AF patient population, N (%) | RE-LY<br>GPRD AF patients meeting trial criteria, n (% [95% CI]) | ARISTOTLE<br>GPRD AF patients meeting trial criteria n (% [95% CI]) | ROCKET-AF<br>GPRD AF patients meeting trial criteria, n (% [95% CI]) |
|--------------------------------------------|--------------------------------------------------------------------------------------------------------------------|-----------------------------------|------------------------------------------------------------------|---------------------------------------------------------------------|----------------------------------------------------------------------|
| Total GPRD AF population                   | Not anticoagulant-eligible/potentially anticoagulant-eligible/should receive anticoagulant according to guidelines | 83,898 (100%)                     | 53,640 (64% [63.59-64.41])                                       | 51,415 (61% [60.58-61.42])                                          | 39,892 (48% [47.66-48.34])                                           |
| <b>Intermediate- or high-risk patients</b> |                                                                                                                    |                                   |                                                                  |                                                                     |                                                                      |
| CHADS <sub>2</sub> ≥1                      | Potentially anticoagulant-eligible/should receive anticoagulant according to guidelines                            | 71,493 (85%)                      | 52,783 (74% [73.68-74.32])                                       | 51,415 (72% [71.67-72.33])                                          | 39,892 (56% [55.64-56.36])                                           |
| CHA <sub>2</sub> DS <sub>2</sub> -VASC ≥1  | Potentially anticoagulant-eligible/should receive anticoagulant according to guidelines                            | 78,783 (94%)                      | 53,640 (68% [67.67-68.33])                                       | 51,163 (65% [64.67-65.33])                                          | 39,892 (51% [50.65-51.35])                                           |
| <b>High-risk patients</b>                  |                                                                                                                    |                                   |                                                                  |                                                                     |                                                                      |
| CHADS <sub>2</sub> ≥2                      | Should receive anticoagulant according to guidelines                                                               | 49,099 (59%)                      | 38,493 (78% [77.63-78.37])                                       | 35,712 (73% [72.61-73.39])                                          | 39,892 (81% [80.65-81.35])                                           |
| CHA <sub>2</sub> DS <sub>2</sub> -VASC ≥2  | Should receive anticoagulant according to guidelines                                                               | 72,824 (87%)                      | 53,059 (73% [72.68-73.32])                                       | 50,623 (70% [69.67-70.33])                                          | 39,835 (55% [54.64-55.36])                                           |

AF: Atrial Fibrillation; CI: Confidence Interval; GPRD: General Practice Research Database

**Table 2: Proportion of GPRD AF patients eligible for trial participation according to each inclusion/exclusion criteria identified for RE-LY, ARISTOTLE, and ROCKET-AF**

| Criterion                                                                                       | RE-LY<br>N (%) real-world AF<br>patients meeting<br>criterion | ARISTOTLE<br>N (%) real-world<br>patients meeting<br>criterion | ROCKET-AF<br>N (%) real-world<br>patients meeting<br>criterion |
|-------------------------------------------------------------------------------------------------|---------------------------------------------------------------|----------------------------------------------------------------|----------------------------------------------------------------|
| <b>Inclusion</b>                                                                                |                                                               |                                                                |                                                                |
| AF                                                                                              | 83,898 (100)                                                  | 83,898 (100)                                                   | 83,898 (100)                                                   |
| Age ≥ 75 years                                                                                  | 51,034 (61)                                                   | 51,267 (61)                                                    | 51,034 (61)                                                    |
| Stroke, TIA, systemic embolism                                                                  | 11,632 (14)                                                   | 10,577 (13)                                                    | 11,632 (14)                                                    |
| Risk factors                                                                                    |                                                               |                                                                |                                                                |
| Congestive heart failure                                                                        | 1737 (2)                                                      | 16,184 (19)                                                    | 16,009 (19)                                                    |
| Ejection fraction                                                                               |                                                               |                                                                |                                                                |
| Age ≥ 65 years                                                                                  | 70,047 (83)                                                   | -                                                              | -                                                              |
| Diabetes mellitus                                                                               | 3945 (5)                                                      | 14,940 (18)                                                    | 14,850 (18)                                                    |
| Hypertension                                                                                    | 49,747 (59)                                                   | 49,747 (59)                                                    | 67,833 (81)                                                    |
| Coronary artery disease                                                                         | 28,687 (34)                                                   | -                                                              | -                                                              |
| Overall inclusion criteria                                                                      | 64,710 (77)*                                                  | 67,956 (81)†                                                   | 52,540 (63)‡                                                   |
| <b>Exclusion</b>                                                                                |                                                               |                                                                |                                                                |
| Reversible causes of AF                                                                         | 1,124 (1)                                                     | 2,938 (4)                                                      | 350 (<1)                                                       |
| Mitral valve stenosis                                                                           | -                                                             | 1,213 (1)                                                      | 1213 (1)                                                       |
| Heart valve disorders and conditions other than AF that require chronic anticoagulant treatment | 5,202 (6)                                                     | 5,202 (6)                                                      | 5,202 (6)                                                      |
| Conditions other than AF requiring chronic anticoagulant treatment                              |                                                               |                                                                |                                                                |
| Heart valve disorder                                                                            | 4,792 (6)                                                     |                                                                | 0 (0)                                                          |
| Stroke or TIA                                                                                   |                                                               |                                                                |                                                                |
| Recent stroke                                                                                   | 429 (1)                                                       | 62 (<1)                                                        | 429 (1)                                                        |
| Recent TIA                                                                                      | -                                                             | -                                                              | 71 (<1)                                                        |
| Increased risk of bleeding                                                                      | 1,044 (1)                                                     | 1,044 (1)                                                      | 1,044 (1)                                                      |
| Intracranial neoplasm, arteriovenous malformation, or aneurysm                                  | -                                                             | -                                                              | 2350 (3)                                                       |
| Uncontrolled hypertension                                                                       | 2,014 (2)                                                     | 2,014 (2)                                                      | 2,014 (2)                                                      |
| Planned cardioversion                                                                           | -                                                             | -                                                              | 843 (1)                                                        |
| Renal impairment                                                                                | 2,149 (3)                                                     | 2,149 (3)                                                      | 2,149 (3)                                                      |
| ASA at specified dose                                                                           | -                                                             | 1,629 (2)                                                      | 1,767 (2)                                                      |
| ASA + thienopyridine                                                                            | -                                                             | 203 (<1)                                                       | 203 (<1)                                                       |
| Intravenous antiplatelets                                                                       | -                                                             | -                                                              | 0 (0)                                                          |
| Other concomitant treatments                                                                    |                                                               |                                                                |                                                                |
| Fibrinolytics                                                                                   | 0 (0)                                                         | -                                                              | 0 (0)                                                          |
| NSAID                                                                                           | -                                                             | -                                                              | 2,729 (3)                                                      |
| P450 3A4 inhibitor                                                                              | -                                                             | -                                                              | 4 (<1)                                                         |
| P450 3A4 inducer                                                                                | -                                                             | -                                                              | 1,125 (1)                                                      |
| Investigational drug                                                                            | 0 (0)                                                         | 0 (0)                                                          | 0 (0)                                                          |
| Other concomitant conditions                                                                    |                                                               |                                                                |                                                                |
| Liver disease                                                                                   | 1,547 (2)                                                     | -                                                              | 1,547 (2)                                                      |
| Hepatitis A, B, or C                                                                            | 698 (<1)                                                      | -                                                              | -                                                              |
| HIV                                                                                             | -                                                             | -                                                              | 14 (<1)                                                        |
| Active infective endocarditis                                                                   | 8 (<1)                                                        | 8 (<1)                                                         | 8 (<1)                                                         |
| Anemia                                                                                          | 794 (1)                                                       | 794 (1)                                                        | 794 (1)                                                        |
| Substance abuse and psychosocial                                                                | 28 (<1)                                                       | 28 (<1)                                                        | -                                                              |
| INR monitoring                                                                                  | -                                                             | 3,513 (4)                                                      | -                                                              |
| <b>Overall inclusion and exclusion criteria</b>                                                 | <b>53,640 (64%)</b>                                           | <b>51,415 (61%)</b>                                            | <b>39,892 (48%)</b>                                            |

\*Inclusion criteria for RE-LY specify AF plus at least one of age ≥75 years; history of previous stroke, TIA or systemic embolism; ejection fraction <40%; or symptomatic heart failure OR AF plus age ≥65 years plus one of diabetes mellitus; documented coronary artery disease; or hypertension requiring medical treatment<sup>7</sup>

†Inclusion criteria for ARISTOTLE specify AF plus at least one of age ≥75 years; prior stroke; symptomatic congestive heart failure or ejection fraction ≤40%; diabetes; or hypertension requiring pharmacological treatment<sup>23</sup>

‡Inclusion criteria for ROCKET-AF specify AF plus history of stroke, TIA, or systemic embolism OR AF plus at least two of age ≥75 years; congestive heart failure or ejection fraction ≤35%; or diabetes; or hypertension<sup>22</sup>

Note that the planned cardioversion exclusion criterion within the ROCKET-AF trial was conceptualised within the study by excluding patients having cardioversion within 12 months of the index date

1  
2  
3 AF: Atrial Fibrillation; ASA: acetylsalicylic acid; GPRD: General Practice Research Database; HIV: Human Immunodeficiency  
4 Virus; INR: International Normalised Ratio; NSAID: Non-Steroidal Anti-Inflammatory Drug; TIA: Transient Ischemic Attack  
5  
6  
7  
8  
9  
10  
11  
12  
13  
14  
15  
16  
17  
18  
19  
20  
21  
22  
23  
24  
25  
26  
27  
28  
29  
30  
31  
32  
33  
34  
35  
36  
37  
38  
39  
40  
41  
42  
43  
44  
45  
46  
47  
48  
49  
50  
51  
52  
53  
54  
55  
56  
57  
58  
59  
60

For peer review only

1  
2  
3  
4  
5 **Representativeness of the dabigatran, apixaban, and rivaroxaban clinical trial**  
6 **populations to real-world atrial fibrillation patients in the United Kingdom:**  
7 **A cross-sectional analysis using the General Practice Research Database**  
8  
9

10  
11 Sally Lee, PhD<sup>1</sup>, Brigitta U Monz, MD<sup>2</sup>, Andreas Clemens, MD<sup>3</sup>, Martina Brueckmann, MD<sup>3</sup>, Gregory YH  
12 Lip, MD<sup>4</sup>  
13

14 <sup>1</sup>Boehringer Ingelheim Ltd., UK

15  
16 <sup>2</sup>Boehringer Ingelheim GmbH, Ingelheim, Germany

17  
18 <sup>3</sup>Boehringer Ingelheim Pharma GmbH & Co. KG, Ingelheim, Germany

19  
20 <sup>4</sup>University of Birmingham Centre for Cardiovascular Sciences, City Hospital Birmingham, UK  
21  
22

23  
24 Corresponding Author:

25  
26 Name: Dr. Brigitta Monz, MD, MPH, MA Ethics in Medicine

27  
28 Address: Boehringer Ingelheim GmbH, Global Health Economics & Outcomes Research, Binger Str.  
29 173, 55216 Ingelheim am Rhein, Germany

30  
31 Email: [brigitta.monz@boehringer-ingelheim.com](mailto:brigitta.monz@boehringer-ingelheim.com)

32  
33 Fax: +49 (6132) 77 6146

34  
35 Telephone: +49 (6132) 7793362  
36  
37  
38  
39

40  
41 KEYWORDS: apixaban – atrial fibrillation – dabigatran – generalisibility – rivaroxaban  
42  
43

44  
45 WORD COUNT (excluding title page, abstract, references, and tables): 3990  
46  
47  
48  
49  
50  
51  
52  
53  
54  
55  
56  
57  
58  
59  
60

1  
2  
3 **Abstract** Word count: 300  
4  
5  
6

7 **Objective:** Three oral anticoagulants have reported study results for stroke prevention in patients  
8 with atrial fibrillation (AF) (dabigatran etexilate, rivaroxaban, apixaban); all demonstrated superiority  
9 or non-inferiority compared with warfarin (RE-LY, ARISTOTLE, ROCKET-AF). This study aimed to  
10 assess the representativeness ~~of the results from RE-LY, ARISTOTLE, and ROCKET-AF to~~for the real-  
11 world AF population, particularly the population eligible for anticoagulants, ~~in the UK~~.  
12  
13

14  
15  
16  
17 **Design:** A cross-sectional database analysis ~~was conducted~~.  
18  
19

20 **Setting:** ~~DA~~dataset derived from the General Practice Research Database (GPRD).  
21  
22

23 **Primary and secondary outcomes measure:** The proportion of real-world patients with AF who  
24 met the inclusion/exclusion criteria for RE-LY, ARISTOTLE, and ROCKET-AF were compared. The  
25 results were then stratified by risk of stroke using CHADS<sub>2</sub> and CHA<sub>2</sub>DS<sub>2</sub>-VASc.  
26  
27  
28

29  
30 **Results:** 83,898 patients with AF were identified in the GPRD. For the population at intermediate or  
31 high risk of stroke and eligible for anticoagulant treatment (CHA<sub>2</sub>DS<sub>2</sub>-VASc  $\geq 1$ ; n=78,783 [94%]), the  
32 proportion eligible for inclusion into RE-LY (dabigatran etexilate) was 68% (95% CI:67.7%-68.3%;  
33 n=53,640), compared with 65% (95% CI:64.7%-65.3%; n=51,163) eligible for ARISTOTLE  
34 (apixaban) and 51% (95% CI:50.7%-51.4%; n=39,892) eligible for ROCKET-AF (rivaroxaban). Using  
35 the CHADS<sub>2</sub> method of risk stratification, for the population at intermediate or high risk of stroke and  
36 eligible for anticoagulation treatment (CHADS<sub>2</sub>  $\geq 1$ ; n=71,493 [85%]), the proportion eligible for  
37 inclusion into RE-LY was 74% (95% CI:73.7%-74.3%; n=52,783), compared with 72% (95%  
38 CI:71.7%-72.3%; n=51,415) for ARISTOTLE and 56% (95% CI:55.6%-56.4%; n=39,892) for  
39 ROCKET-AF.  
40  
41  
42  
43  
44  
45  
46  
47  
48  
49  
50  
51  
52  
53  
54  
55  
56  
57  
58  
59  
60



1  
2  
3 **Conclusions:** Patients enrolled within RE-LY and ARISTOTLE were more reflective of the 'real-world'  
4 AF population in the UK, in contrast to patients enrolled within ROCKET-AF who were a more  
5 narrowly-defined group of patients at higher risk of stroke. Differences between trials should be taken  
6 into account when considering the applicability of findings from randomised clinical trials. However,  
7 assessing representativeness is not a substitute for assessing generalisability, that is, how well clinical  
8 trial results would translate into effectiveness and safety in everyday routine care.  
9  
10  
11  
12  
13  
14  
15  
16  
17  
18  
19  
20  
21  
22  
23  
24  
25  
26  
27  
28  
29  
30  
31  
32  
33  
34  
35  
36  
37  
38  
39  
40  
41  
42  
43  
44  
45  
46  
47  
48  
49  
50  
51  
52  
53  
54  
55  
56  
57  
58  
59  
60

## Article summary

### Article focus

- The focus of this study was to assess the applicability of the findings of three randomised, controlled trials for stroke prevention in patients with atrial fibrillation (AF) to the real-world UK population of individuals with this condition, particularly to patients who would be eligible for anticoagulation under current guidelines.
- The three studies were RE-LY, ARISTOTLE and ROCKET-AF that investigated the efficacy and safety of dabigatran etexilate (dabigatran), apixaban and rivaroxaban compared to warfarin, respectively.

### Key messages

- Patients enrolled in RE-LY and ARISTOTLE were more reflective than patients enrolled in ROCKET-AF with respect to the real-world AF population in the UK, including the population eligible for anticoagulation.
- About 2/3 of patients recommended for anticoagulation would have been eligible to enrol into the clinical study investigating dabigatran (68%) or apixaban (65%) , but only about half of the patients would have been eligible for the rivaroxaban study (51%).
- Differences in representativeness should be taken into account when transferring study findings to patient populations in routine care.

### Strengths and limitations of this study

- The source population for this research, i.e. the General Practice Research Database (GPRD) is the largest primary care database in the world, containing the records of a representative sample of the British population.

- 1  
2  
3  
4  
5  
6  
7  
8  
9  
10  
11  
12  
13  
14  
15  
16  
17  
18  
19  
20  
21  
22  
23  
24  
25  
26  
27  
28  
29  
30  
31  
32  
33  
34  
35  
36  
37  
38  
39  
40  
41  
42  
43  
44  
45  
46  
47  
48  
49  
50  
51  
52  
53  
54  
55  
56  
57  
58  
59  
60
- Operationalisation of the inclusion and exclusion criteria of the clinical studies in order to assess the eligibility for study enrolment of patients seen in routine care required in some instances assumptions.
  - AF diagnosis in the GPRD may not always be accurate. However, the majority of AF cases were correctly coded according to a recent systematic review, and any errors would not be expected to systematically bias the findings of this research in favour of one study.
  - Assessing representativeness cannot substitute for the assessment of generalisability, i.e. how well the clinical trial results translate into effectiveness and safety in routine care. This will need to be assessed once the drugs under study have been used for several years in daily practice.

## Background

Atrial fibrillation (AF) is the most common sustained cardiac arrhythmia, and is associated with an increased risk of stroke and other thromboembolic events. Approximately one in five of all strokes are caused by AF,<sup>1</sup> with the risk of stroke increased by four- to five-fold in patients with AF compared with the general population.<sup>2</sup> The condition is often asymptomatic,<sup>3</sup> but mortality in patients with chronic AF has been reported to be up to 2.5 times higher than in the general population, with the relative risk of death higher in women than in men.<sup>4</sup> The economic burden of AF is also high, with a key cost-driver being hospitalisation. This economic burden of AF has increased significantly over the last few decades, and is expected to increase even more in future due to aging populations.<sup>5</sup>

Oral anticoagulants form the current standard of care for patients with AF considered at intermediate to high risk of stroke, and are effective therapies for stroke prevention.<sup>1,3,6</sup> For many decades, warfarin was the only anticoagulant available; for now, three novel oral anticoagulant agents (dabigatran etexilate [later referred to as dabigatran], apixaban, and rivaroxaban) have demonstrated superiority or non-inferiority to warfarin with respect to the primary efficacy outcome of stroke or systemic embolism in Phase III randomised controlled trials.<sup>7-9</sup>

In RE-LY (n=18,113; ITT population), dabigatran at a dose of 150 mg twice daily was associated with a lower rate of stroke or systemic embolism (Relative Risk [RR], 95% Confidence Interval [CI]: 0.65, 0.52-0.81; p<0.001 for superiority) and did not significantly increase major bleeding (RR, 95% CI: 0.93, 0.81-1.07; p=0.32) when compared with warfarin. At a lower dose (110 mg, twice daily), dabigatran was associated with rates of stroke or systemic embolism that were similar to warfarin (RR, 95% CI: 0.90, 0.74-1.10; p<0.001 for non-inferiority) but significantly reduced major bleeding compared with warfarin (RR, 95% CI: 0.80, 0.70-0.93; p=0.003).<sup>7,10</sup> In ARISTOTLE (n=18,201; ITT population), apixaban (5 mg, twice daily) was associated with a lower rate of stroke or systemic embolism (Hazard Ratio [HR], 95% CI: 0.79, 0.66-0.95; p<0.001 for non-inferiority; p=0.01 for superiority) and reduced rates of major bleeding (HR, 95% CI: 0.69, 0.60-0.80; p<0.001) when compared with warfarin.<sup>9</sup> In ROCKET-AF (n=14,171; ITT population), rivaroxaban (20 mg, once daily) was associated with a similar rate of stroke or systemic embolism compared with warfarin (HR, 95%

1  
2  
3 CI: 0.88, 0.75-1.03;  $p < 0.001$  for non-inferiority,  $p = 0.12$  for superiority; ITT population) with no  
4  
5 significant improvement in the rate of major bleeding (HR, 95% CI: 1.04, 0.90-1.20;  $p = 0.58$ , safety  
6  
7 on treatment population).<sup>8</sup> Of these three anticoagulants, only dabigatran and rivaroxaban are  
8  
9 currently approved in Europe for stroke prevention in patients with AF.<sup>11,12</sup>

10  
11 Although these three RCTs have demonstrated that the three new anticoagulants are superior or non-  
12  
13 inferior to warfarin in terms of stroke prevention, these studies applied specific inclusion and  
14  
15 exclusion criteria that may have excluded patients who would otherwise be treated in real-life clinical  
16  
17 practice, currently with warfarin. Therefore it is unknown whether the patient populations included in  
18  
19 RE-LY, ARISTOTLE, and ROCKET-AF reflect 'real-world' patients with AF, and therefore whether the  
20  
21 study results can be generalised to the wider patient population.  
22

23  
24 To date there have been no studies comparing the eligibility criteria of these three trials. This study  
25  
26 (RADAR: Representativeness and generalisability of the dabigatran, apixaban, and rivaroxaban clinical  
27  
28 trial populations to real-world AF patients in the United Kingdom) aimed to assess the differences  
29  
30 between the three trial populations of RE-LY, ARISTOTLE, and ROCKET-AF and the real-world  
31  
32 patients with AF recorded within the General Practice Research Database (GPRD) in the United  
33  
34 Kingdom (UK). An analysis on patients at intermediate- or high- risk of stroke allowed a focus on  
35  
36 patients for whom, according to current clinical guidelines,<sup>1,3,6,13-15</sup> an anticoagulant could be  
37  
38 prescribed. Risk of stroke is commonly assessed using stroke risk scores, such as the CHADS<sub>2</sub> score.<sup>16</sup>  
39  
40 The CHA<sub>2</sub>DS<sub>2</sub>-VASc score has also been introduced and, based on multiple validation studies, is more  
41  
42 accurate in identifying truly low-risk patients who do not require anticoagulation therapy and is at  
43  
44 least as good as (possibly superior to) CHADS<sub>2</sub> in identifying high-risk patients who develop  
45  
46 thrombembolism.<sup>16</sup> Both CHADS<sub>2</sub> and CHA<sub>2</sub>DS<sub>2</sub>-VASc scores were used to stratify patients in the  
47  
48 current study. The CHA<sub>2</sub>DS<sub>2</sub>-VASc scoring became available after the three clinical studies had been  
49  
50 initiated.  
51

52  
53 It was hypothesised that the trial populations within RE-LY, ROCKET-AF, and ARISTOTLE, as selected  
54  
55 by the trial protocol inclusion and exclusion criteria, would vary in their representativeness to real-  
56  
57 world AF populations, particularly for those eligible for anticoagulant treatment based on current  
58  
59  
60

1  
2  
3 guidelines.  
4  
5  
6  
7  
8  
9  
10  
11  
12  
13  
14  
15  
16  
17  
18  
19  
20  
21  
22  
23  
24  
25  
26  
27  
28  
29  
30  
31  
32  
33  
34  
35  
36  
37  
38  
39  
40  
41  
42  
43  
44  
45  
46  
47  
48  
49  
50  
51  
52  
53  
54  
55  
56  
57  
58  
59  
60

For peer review only

## Design

### Objectives

The objective of this study was to assess the representativeness of RE-LY, ARISTOTLE, and ROCKET-AF to the real-world AF population in the UK. The study design was a cross-sectional database analysis.

### Data source

The GPRD was used as a source of information on the general AF population. In the UK, patients are semi-permanently registered at a specific practice where General Practitioners (GPs) provide primary care and make specialist referrals. These practices centralize the medical information from the GPs themselves, and also information from the specialist referrals and hospitalisations.<sup>17</sup> The GPRD is a computerised database comprising anonymous medical records from over 630 practices in the UK, covering approximately 8% of the UK population.<sup>18</sup> The database contains longitudinal data on patient demographics, diagnoses, referrals, prescribing, and health outcomes and has a geographical distribution that is representative of the UK population.<sup>19</sup> The median proportion of diagnoses correctly coded by the GPRD was recently demonstrated to be 89% (range 24% to 100%) in a systematic literature review of GPRD studies.<sup>20</sup> The GPRD has obtained ethical approval from a Multicentre Research Ethics Committee for all purely observational research using GPRD data; specifically, studies which do not include patient involvement.<sup>21</sup>

### Population

Patients from the GPRD were included if they had a diagnosis of non-valvular AF, were still alive and registered with a GP practice on the 31<sup>st</sup> March 2008, and were aged  $\geq 18$  years of age. An artificial start date was defined for 31<sup>st</sup> March 2008 to allow sufficient time for the application of prospective exclusion criteria, such as 'clinically significant GI bleeding within six months of randomisation'.

### Inclusion/exclusion criteria

The inclusion/exclusion criteria from RE-LY, ROCKET-AF, and ARISTOTLE were derived primarily from the trial design and rationale publications,<sup>22-24</sup> with clarification sought from supplementary appendices and primary clinical trial result publications<sup>7-9</sup> where required. A full description of the inclusion and exclusion criteria applied is provided in the Supplementary Material. Of note, the ROCKET-AF trial required patients to have a history of stroke, TIA, or systemic embolism (i.e. secondary prevention cohort) or had to have *two* of the following: age  $\geq 75$  years, congestive heart failure or ejection fraction  $\leq 35\%$ , diabetes, or hypertension.

With respect to the ROCKET-AF trial, there was a contradiction between the hypertension risk factor inclusion criterion described in the ROCKET-AF rationale and design publication (systolic blood pressure  $\geq 180$  mmHg or diastolic blood pressure  $\geq 100$  mmHg)<sup>22</sup> and in the supplementary appendix of the results publication (use of antihypertensives within 6 months before screening or persistent systolic blood pressure  $>140$  mmHg or persistent diastolic blood pressure  $>90$  mmHg)<sup>8</sup>. In the current analysis the more inclusive criterion from the supplementary appendix has been used in place of the trial design publication.

The inclusion/exclusion criteria were then used to identify the total number of patients with AF in the GPRD who would meet the trial eligibility criteria. READ codes were used as the principal method of identifying patients from the GPRD who would meet the trial inclusion/exclusion criteria. READ codes are a coded thesaurus of clinical terms and form the basic means through which physicians record patient findings and interventions in health and social care IT systems within the UK.<sup>25</sup> Prescription data were also used to identify patients prescribed medications that may have affected their eligibility for one or more of the trials (e.g. long term non-steroidal anti-inflammatory drug usage), and test results were used to identify patients meeting criterion (e.g. abnormal platelet and haemoglobin levels) forming part of the exclusion criteria for the trials.

The CHADS<sub>2</sub> and CHA<sub>2</sub>DS<sub>2</sub>-VASc scores were then used to stratify patients from the GPRD by risk of stroke (low, medium, and high). CHADS<sub>2</sub> assigns one point to patients for chronic heart failure, hypertension, age  $\geq 75$  years, and/or diabetes, and two points for history of stroke or transient



1  
2  
3 ischemic attack (TIA). A score of 1 indicates an intermediate risk of stroke, a score of  $\geq 2$  indicates a  
4 high risk of stroke.<sup>3</sup> In contrast, CHA<sub>2</sub>DS<sub>2</sub>-VASc assigns one point for congestive heart failure,  
5 hypertension, diabetes, vascular disease, female gender, and/or age 65-74 years, and two points for  
6 history of stroke or TIA and/or age  $\geq 75$  years.<sup>16</sup> As with CHADS<sub>2</sub>, a score of 1 on the CHA<sub>2</sub>DS<sub>2</sub>-VASc  
7 indicates an intermediate risk of stroke, and a score of  $\geq 2$  indicates a high risk of stroke.<sup>16</sup>  
8  
9  
10  
11  
12

### 13 **Outcomes**

14  
15  
16 The outcomes of interest were the proportion of real-world patients with AF in the GPRD who would  
17 meet the inclusion/exclusion criteria for each of the three trials (RE-LY, ARISTOTLE, and ROCKET-AF),  
18 as well as the proportion of real-world patients with AF classified at intermediate or high risk of stroke  
19 who would meet the respective inclusion/exclusion criteria, stratified by the risk of stroke according to  
20 both the CHADS<sub>2</sub> and the CHA<sub>2</sub>DS<sub>2</sub>-VASc. The specific inclusion and exclusion criteria for each of the  
21 three trials were also examined to determine if there were key criteria causing differences between  
22 trials.  
23  
24  
25  
26  
27  
28  
29  
30

### 31 **Statistical Analysis**

32  
33  
34 The proportion of patients from the GPRD who would be eligible for RE-LY was compared with the  
35 proportion that would be eligible for ARISTOTLE and ROCKET-AF using the Chi-squared test at a  
36 significance level of 5%. All analyses are descriptive and exploratory.  
37  
38  
39  
40  
41  
42  
43  
44  
45  
46  
47  
48  
49  
50  
51  
52  
53  
54  
55  
56  
57  
58  
59  
60

## Results

### Patients eligible for RE-LY, ARISTOTLE, and ROCKET-AF

In total, 83,898 patients with AF were identified from the GPRD (Table 1). Of these patients, 64% met the inclusion/exclusion criteria for enrolment into RE-LY. This compares with 61% of patients who were eligible for inclusion into ARISTOTLE and 48% of patients who were eligible for inclusion into ROCKET-AF. The proportion of real-world patients who would be eligible for inclusion within the RE-LY trial was statistically significantly higher than the proportion of real-world patients who would be eligible for ARISTOTLE or ROCKET-AF ( $p < 0.001$  for both comparisons), though the small difference against ARISTOTLE is probably not clinically meaningful.

### Intermediate- and high-risk patients eligible for RE-LY, ARISTOTLE, and ROCKET-AF

In clinical practice, only patients considered at intermediate or high risk of stroke would receive anticoagulation therapy. Using the CHADS<sub>2</sub> score, 71,493 (85%) patients from the total GPRD AF population would be eligible for anticoagulant therapy, of which 74% would meet the RE-LY inclusion/exclusion criteria, 72% would meet the ARISTOTLE criteria, and 56% would meet the ROCKET-AF criteria (Table 1). Using the CHA<sub>2</sub>DS<sub>2</sub>-VASc score, 78,783 (94%) patients from the total GPRD population would be eligible for anticoagulant therapy, of which 68% would meet the RE-LY inclusion/exclusion criteria, 65% would meet the ARISTOTLE criteria, and 51% would meet the ROCKET-AF criteria (Table 1).

### Eligibility by individual inclusion and exclusion criterion

The inclusion rather than exclusion criteria were the primary determinants for the trial population in RE-LY (77% of GPRD AF population eligible), ARISTOTLE (81% of GPRD AF population eligible), and ROCKET-AF (63% of GPRD AF population eligible), as would be expected (Table 2). Within the inclusion criteria, the greatest difference between trials was seen with the hypertension definition, where 81% of the GPRD AF population met this criterion in ROCKET-AF, compared to 59% of real-world patients for the RE-LY and ARISTOTLE hypertension criteria (Table 2). This difference, which favours ROCKET-AF over RE-LY and ARISTOTLE with respect to inclusivity, did not appear to be a

1  
2  
3 major driver for differences in overall inclusion eligibility for the trials. Instead, the differences in  
4 inclusion eligibility were not driven by an individual inclusion criterion, but by the different  
5 combinations of individual inclusion criteria within the trials.  
6  
7

8  
9 For the exclusion criteria specifically, the requirement for anticoagulant treatment for conditions other  
10 than AF excluded 6% of GPRD patients with AF from all trials, with renal impairment excluding a  
11 further 3% of the GPRD AF population. Although the exclusion criteria differed between trials, none of  
12 the individual criteria appear to be a key driver of the different proportions of real-world patients  
13 eligible for the trials (Table 2).  
14  
15  
16  
17  
18  
19  
20  
21  
22  
23  
24  
25  
26  
27  
28  
29  
30  
31  
32  
33  
34  
35  
36  
37  
38  
39  
40  
41  
42  
43  
44  
45  
46  
47  
48  
49  
50  
51  
52  
53  
54  
55  
56  
57  
58  
59  
60

## Discussion

The results of this analysis demonstrate that the warfarin-controlled pivotal trials for the novel oral anticoagulants dabigatran (RE-LY), apixaban (ARISTOTLE), and rivaroxaban (ROCKET-AF) vary in their representativeness of the AF population enrolled. Based on GPRD, the RE-LY trial enrolled a patient population that is most closely matched to patients with AF seen in general practice within the UK compared to the populations enrolled according to the exclusion/inclusion criteria for the other trials. Overall, 68% of intermediate- or high-risk patients with AF captured within the GPRD would be eligible for inclusion into RE-LY, as compared with 65% and 51% for ARISTOTLE and ROCKET-AF respectively (as categorised by  $\text{CHA}_2\text{DS}_2\text{-VASc} \geq 1$ ). Being more inclusive and representative of the general AF population allows trial findings to be more readily generalised to patients seen in everyday clinical practice (and eligible for anticoagulant therapy). The RE-LY patient population is also slightly more inclusive of AF patients eligible for anticoagulant treatment, than the population in the ARISTOTLE trial (difference of 3%;  $p < 0.001$ ) but this statistically significant difference between the RE-LY and ARISTOTLE populations would not necessarily translate into clinically meaningful differences for the real-world population.

It is important to note that a higher risk patient population was intentionally enrolled in ROCKET-AF (mean  $\text{CHADS}_2$  risk score of 3.48) compared with both the RE-LY (mean  $\text{CHADS}_2$  risk score of 2.1) and ARISTOTLE (mean  $\text{CHADS}_2$  risk score of 2.2) trials, and thus, a large number of patients who would be eligible for anticoagulant treatment under current guidelines would not have been entered into ROCKET-AF. Indeed, there are no data for patients with a  $\text{CHADS}_2$  score 0-1 in ROCKET-AF, and only 13% of this trial population had a  $\text{CHADS}_2$  score of 2.<sup>8</sup> A significant number of patients who could be eligible for anticoagulation in general practice (intermediate or high risk of stroke according to the  $\text{CHADS}_2$  risk score) and who would be included within RE-LY are excluded from ROCKET-AF (18%). In total, 13,748 patients with AF eligible for the RE-LY study would have been excluded from the ROCKET-AF trial within the total GPRD AF population (low, intermediate, or high risk of stroke). Thus, some care should be taken when generalizing the trial results from the high risk subpopulation seen in ROCKET-AF to the general AF population encountered in clinical practice.

1  
2  
3 Trial generalisability (external validity) is a recognised problem in randomised controlled trials. The  
4 trial participants enrolled in a trial may differ considerably from the target population/clinical practice  
5 in which the trial's findings are later used, and trial eligibility criteria can contribute to this lack of  
6 generalisability.<sup>26</sup> The current analysis indicates that the rate of inclusion observed within the RE-LY  
7 trial (and probably, ARISTOTLE) is at least as representative of the general population as other  
8 pivotal trials have been found to be. For example, a recent analysis of patients enrolled in eight  
9 placebo controlled clinical trials for amyotrophic lateral sclerosis (ALS) found that 66% of patients  
10 diagnosed with ALS in Italy between 2003 and 2008 met the eligibility criteria for the trials.<sup>27</sup>  
11 However, this analysis reported that the ALS patients enrolled within the clinical trials were  
12 demographically and clinically different from the patients within the national ALS population, with the  
13 differences between the trial cohorts and patient population resulting in part from the different  
14 eligibility criteria used and in part from factors unrelated to enrolment criteria. With respect to risk of  
15 stroke as determined by CHADS<sub>2</sub> score, 26% of individuals in a study of the incidence and prevalence  
16 of chronic AF in the UK (using also the GPRD as a data source), had a CHADS<sub>2</sub> score of  $\geq 3$ ,<sup>17</sup>  
17 compared with 33% in RE-LY,<sup>7</sup> 32% in ARISTOTLE,<sup>9</sup> and 87% in ROCKET-AF.<sup>8</sup> This demonstrates  
18 that both RE-LY and ARISTOTLE were substantially more reflective of the real-world AF population  
19 (based on the GPRD) than ROCKET-AF when considering the proportion of the population at differing  
20 risk of stroke. It is interesting to note that little research has actually been conducted to quantify the  
21 representativeness of trial populations with regards to real life populations. This is surprising given  
22 that the external validity of trials is always questioned, especially in the context of reimbursement  
23 decisions and Health Technology Assessments (HTA). More systematic research in this area appears  
24 to be warranted, particularly with respect to how the external validity of a trial then affects the  
25 'translation' of efficacy to effectiveness.

26  
27  
28  
29  
30  
31  
32  
33  
34  
35  
36  
37  
38  
39  
40  
41  
42  
43  
44  
45  
46  
47  
48  
49 When classifying patient risk, risk groups stratified by the CHA<sub>2</sub>DS<sub>2</sub>-VASc score may be considered to  
50 be more accurate than those stratified by CHADS<sub>2</sub>, particularly to identify 'truly low risk' patients who  
51 do not need any antithrombotic therapy, due to the more inclusive nature of common stroke risk  
52 factors in CHA<sub>2</sub>DS<sub>2</sub>-VASc.<sup>16</sup> This is important when considering the results of the current study, since  
53 the intermediate or high risk population by CHA<sub>2</sub>DS<sub>2</sub>-VASc included 7,290 more patients than did the  
54  
55  
56  
57  
58  
59  
60

1  
2  
3 intermediate or high risk population by CHADS<sub>2</sub>. These patients are at risk of stroke but may not  
4 receive treatment if miscategorised as low risk by the CHADS<sub>2</sub> score; indeed, one recent analysis  
5 suggests that a CHADS<sub>2</sub> score=0 is not low risk with stroke rates that can range between 0.8% per  
6 year to 3.2% per year when subdivided by CHA<sub>2</sub>DS<sub>2</sub>-VASc score.<sup>28</sup> The 2010 ESC guidelines suggest  
7 that although CHADS<sub>2</sub> is useful as a simple initial means of assessing risk, patients scoring 0 or 1  
8 should undergo more comprehensive assessment, for example with CHA<sub>2</sub>DS<sub>2</sub>-VASc.<sup>1</sup> In the 2012  
9 focussed update of the ESC guidelines, the only recommended stroke risk score is CHA<sub>2</sub>DS<sub>2</sub>-VASc,  
10 with the initial focus on identification 'truly low risk' patients (that is, age <65 and lone AF, or  
11 CHA<sub>2</sub>DS<sub>2</sub>-VASc=0) who do not need any antithrombotic therapy. Those with ≥1 stroke risk factors  
12 can be offered effective stroke prevention, which is oral anticoagulation.<sup>29</sup>

### 23 24 25 26 **Limitations**

27  
28  
29 It should be noted that a number of the criteria included in the trial design for RE-LY, ARISTOTLE,  
30 and ROCKET-AF were not recorded in the GPRD or were difficult to extract. For example, planned  
31 major surgery would not be captured within the database, nor would a life expectancy of less than 1  
32 year, both of which are exclusion criteria in one or more of the trials. However, these criteria were  
33 likely to have had minimal impact on the final populations included within the RCTs, since many of  
34 the criteria that could not be applied to the GPRD population were consistent across all three trials.  
35 This means that the impact of applying the individual criterion would be the same across RE-LY,  
36 ARISTOTLE, and ROCKET-AF, with only the order of magnitude affected. A potential limitation of the  
37 current study is that the analyses were reliant on the quality of GP coding in the GPRD dataset. A  
38 recent systematic review of the validity of diagnostic coding in the GPRD reported that >80% of  
39 events such as myocardial infarction and stroke were correctly coded, but a lower proportion (64.4%)  
40 of AF cases were correctly coded.<sup>30</sup> This means that there may be some error in the characteristics of  
41 the GPRD population taken to be a reflection of the general AF population in the UK. However, this is  
42 unlikely to affect the conclusion drawn from the current study, since the errors in coding are unlikely  
43 to be focused on a specific subgroup of patients and instead would be expected to be distributed

1  
2  
3 across the whole AF population in the UK. Although the total number of patients classified as having  
4 AF in the GPRD may be lower than the total number of patients with AF in the UK, there is no reason  
5 to suspect that the patients miscoded would have systematically differed in characteristics to those  
6 correctly coded within the database.  
7  
8  
9

10  
11  
12  
13 In order to answer the question of generalisability, it would be necessary to compare clinical trial  
14 results with effectiveness and safety findings observed in routine care. However, to undertake such  
15 real-life assessments typically takes several years as the drugs in question need to become used  
16 widely. Therefore, Health Technology Assessment (HTA) bodies (such as NICE in the UK) often  
17 request that evidence is presented to what extent a trial population is reflective of the population for  
18 which the coverage decision has to be taken and for which the drug is likely to be used in routine  
19 practice. If a study population is very different from the one for which the drug will be used in routine  
20 care, this will increase the uncertainty in such HTA decisions. Such assessment as ours therefore can  
21 serve as a first indication of generalisability. A further limitation is that other study factors that can  
22 influence generalisability have not been investigated in this research, such as the countries  
23 participating in the studies or the quality of the warfarin arm as an indicator for the quality of patient  
24 care<sup>31</sup>.  
25  
26  
27  
28  
29  
30  
31  
32  
33  
34  
35  
36  
37  
38

## 39 **Conclusion**

40  
41 Trial generalisability is an important consideration for the National Institute of Health and Clinical  
42 Excellence (NICE) in the UK and other such HTA bodies, with past criticisms focusing on the lack of  
43 generalisability of trials as a result of the eligibility criteria applied.<sup>32-34</sup> The current analysis  
44 demonstrates that the data from RE-LY and ARISTOTLE are applicable to a larger proportion of real-  
45 world AF patients than data from ROCKET-AF, meaning that the results from the study supporting the  
46 use of dabigatran and apixaban are more generalizable to the general anticoagulant eligible AF  
47 population.  
48  
49  
50  
51  
52  
53  
54  
55  
56  
57  
58  
59  
60

## Acknowledgements

With thanks to James Cann and Ebony Samuels at HERON Evidence Development for contributing to the preparation of the initial draft manuscript.

## Funding source

The study was funded by Boehringer Ingelheim International GmbH.

## Author contributions

SL was responsible for study design, data extraction, and statistical analysis; BM, AC, MB, and GL contributed to study concept, design, and data interpretation. All authors reviewed and significantly contributed to the initial draft manuscript and approved the final submitted version.

## Conflict of interest

SL, BM, AC, and MB are employees of Boehringer Ingelheim, the manufacturer of dabigatran. GYHL has served as a consultant for Bayer, Astellas, Merck, Sanofi, BMS/Pfizer, Daiichi-Sankyo, Biotronik, Portola and Boehringer Ingelheim and has been on the speakers' bureau for Bayer, BMS/Pfizer, Boehringer Ingelheim, and Sanofi Aventis.



## References

- 1 Camm AJ, Kirchhof P, Lip GYH, et al. Guidelines for the management of atrial fibrillation: the Task Force for the Management of Atrial Fibrillation of the European Society of Cardiology. *Eur Heart J* 2010;**31**:2369-429.
- 2 Wolf PA, Abbott RD, Kannel WB. Atrial fibrillation as an independent risk factor for stroke: the Framingham Study. *Stroke* 1991;**22**:983-8.
- 3 National Collaborating Centre for Chronic Conditions. Atrial fibrillation: national clinical guidelines for management in primary and secondary care. London: Royal College of Physicians; 2006.
- 4 Ruigomez A, Johansson S, Wallander MA, et al. Risk of mortality in a cohort of patients newly diagnosed with chronic atrial fibrillation. *BMC Cardiovasc Disord* 2002;**2**:5.
- 5 Wolowacz SE, Samuel M, Brennan VK, et al. The cost of illness of atrial fibrillation: a systematic review of the recent literature. *Europace* 2011;**13**:1375-85.
- 6 Fuster V, Ryden LE, Cannom DS, et al. ACC/AHA/ESC 2006 Guidelines for the management of patients with atrial fibrillation: a report of the American College of Cardiology/American Heart Association Task Force on Practice Guidelines and the European Society of Cardiology Committee for Practice Guidelines (Writing Committee to Revise the 2001 Guidelines for the Management of Patients With Atrial Fibrillation). *Circulation* 2006;**114**:e257-e354.
- 7 Connolly SJ, Ezekowitz MD, Yusuf S, et al. Dabigatran versus warfarin in patients with atrial fibrillation (with supplementary appendix). *N Engl J Med* 2009;**361**:1139-51.
- 8 Patel MR, Mahaffey KW, Garg J, et al. Rivaroxaban versus warfarin in nonvalvular atrial fibrillation (with supplementary appendix). *New Engl J Med* 2011;**365**:883-91.
- 9 Granger CB, Alexander JH, McMurray JJV, et al. Apixaban versus warfarin in patients with atrial fibrillation (including supplementary appendix and study protocol). *New Engl J Med* 2011;**365**:981-92.
- 10 Connolly SJ, Ezekowitz MD, Yusuf S, et al. Newly identified events in the RE-LY trial. *New Engl J Med* 2010;**363**:1875-6.
- 11 Boehringer Ingelheim. Pradaxa 150 mg: summary of product characteristics. emc 2011 August 18 [cited 2011 Nov 8];Available from: URL: <http://www.medicines.org.uk/EMC/medicine/24839/SPC/Pradaxa+150+mg+hard+capsules/>
- 12 Bayer plc. Xarelto 20mg film-coated tablets. emc 2011 [cited 2012 Feb 13];Available from: URL: <http://www.medicines.org.uk/EMC/medicine/25586/SPC/Xarelto+20mg+film-coated+tablets/>
- 13 Wann LS, Curtis AB, Ellenbogen KA, et al. 2011 ACCF/AHA/HRS focused update on the management of patients with atrial fibrillation (update on dabigatran). A report of the American College of Cardiology Foundation/American Heart Association Task Force on Practice Guidelines. *Heart Rhythm* 2011;**8**:e1-e8.

- 1  
2  
3 14 You JJ, Singer DE, Howard PA, et al. Antithrombotic therapy for atrial fibrillation: Antithrombotic  
4 Therapy and Prevention of Thrombosis, 9th ed: American College of Chest Physicians Evidence-  
5 Based Clinical Practice Guidelines. *Chest* 2012;**141**:e531S-e575S.  
6  
7 15 Skanes AC, Healey JS, Cairns JA, et al. Focused 2012 update of the Canadian Cardiovascular  
8 Society atrial fibrillation guidelines: recommendations for stroke prevention and rate/rhythm  
9 control. *Can J Cardiol* 2012;**28**:125-36.  
10  
11 16 Lip GYH, Nieuwlaat R, Pisters R, et al. Refining clinical risk stratification for predicting stroke  
12 and thromboembolism in atrial fibrillation using a novel risk factor-based approach: the Euro  
13 heart survey on atrial fibrillation. *Chest* 2010;**137**:263-72.  
14  
15 17 Rietbrock S, Heeley E, Plumb J, et al. Chronic atrial fibrillation: incidence, prevalence, and  
16 prediction of stroke using the Congestive heart failure, Hypertension, Age >75, Diabetes  
17 mellitus, and prior Stroke or transient ischemic attack (CHADS2) risk stratification scheme. *Am*  
18 *Heart J* 2008;**156**:57-64.  
19  
20 18 General Practice Research Database. The database. Medicines and Healthcare products  
21 Regulatory Agency 2011 [cited 2011 Nov 2];Available from: URL:  
22 <http://www.gprd.com/products/database.asp>  
23  
24 19 Garcia Rodriguez LA, Perez Gutthann S. Use of the UK General Practice Research Database for  
25 pharmacoepidemiology. *Br J Clin Pharmacology* 1998;**45**:419-25.  
26  
27 20 Herrett E, Thomas SL, Schoonen WM, et al. Validation and validity of diagnoses in the General  
28 Practice Research Database: a systematic review. *Br J Clin Pharmacology* 2010;**69**:4-14.  
29  
30 21 General Practice Research Database. Ethical review for GPRD protocols. Medicines and  
31 Healthcare products Regulatory Agency 2012 [cited 2012 Jan 26];Available from: URL:  
32 <http://www.gprd.com/isac/#ethicalReview>  
33  
34 22 Patel M. Rivaroxaban once-daily, oral, direct factor Xa inhibition compared with vitamin K  
35 antagonism for prevention of stroke and embolism trial in atrial fibrillation: rationale and design  
36 of the ROCKET AF study. *Am Heart J* 2010;**159**:340-7.  
37  
38 23 Lopes RD, Alexander JH, Al-Khatib SM, et al. Apixaban for reduction in stroke and other  
39 thromboembolic events in atrial fibrillation (ARISTOTLE) trial: design and rationale. *Am Heart J*  
40 2010;**159**:331-9.  
41  
42 24 Ezekowitz MD, Connolly S, Parekh A, et al. Rationale and design of RE-LY: randomized  
43 evaluation of long-term anticoagulant therapy, warfarin, compared with dabigatran. *Am Heart J*  
44 2009;**157**:805-10, 810.  
45  
46 25 National Health Service. READ codes. NHS Connecting for Health 2011 [cited 2011 Dec  
47 14];Available from: URL:  
48 <http://www.connectingforhealth.nhs.uk/systemsandservices/data/uktc/readcodes>  
49  
50 26 Weiss NS, Koepsell TD, Psaty BM. Generalizability of the results of randomized trials. *Arch*  
51 *Intern Med* 2008;**168**:133-5.  
52  
53  
54  
55  
56  
57  
58  
59  
60

- 1  
2  
3 27 Chio A, Canosa A, Gallo S, et al. ALS clinical trials: do enrolled patients accurately represent the  
4 ALS population? *Neurology* 2011;**77**:1432-7.  
5  
6 28 Olesen JB, Torp-Pedersen C, Hansen ML, et al. The value of the CHA2DS2-VASc score for  
7 refining stroke risk stratification in patients with atrial fibrillation with a CHADS2 score 0-1: A  
8 nationwide cohort study. *Thromb Haemost* 2012;**107**:1172-9.  
9  
10 29 Camm AJ, Lip GYH, De Caterina R, et al. 2012 focused update of the ESC Guidelines  
11 for the management of atrial fibrillation. An update of the 2010 ESC Guidelines for the  
12 management of atrial fibrillation. *Eur Heart J*. 2012 Aug 24. [Epub ahead of print]  
13  
14 30 Khan N, Harrison S, Rose P. Validity of diagnostic coding within the General Practice Research  
15 Database: a systematic review. *Br J Gen Pract* 2011;**60**:e128-e136.  
16  
17 31 Fleming TR, Emerson SS. Evaluating rivaroxaban for nonvalvular atrial fibrillation--regulatory  
18 considerations. *N Engl J Med*. 2011 Oct 27;365(17):1557-9.  
19  
20 32 Burns T. NICE guidance in schizophrenia: how generalisable are drug trials? *The Psychiatrist*  
21 2006;**30**:210-2.  
22  
23 33 National Institute for Health and Clinical Excellence. Erlotinib monotherapy for maintenance  
24 treatment of non-small-cell lung cancer. 2011. Report No.: TA227.  
25  
26 34 National Institute for Health and Clinical Excellence. Dronedarone for the treatment of non-  
27 permanent atrial fibrillation. 2010. Report No.: TA197.  
28  
29  
30  
31  
32  
33  
34  
35  
36  
37  
38  
39  
40  
41  
42  
43  
44  
45  
46  
47  
48  
49  
50  
51  
52  
53  
54  
55  
56  
57  
58  
59  
60

## Tables

**Table 1: Proportion of GPRD AF patients who met inclusion/exclusion criteria for RE-LY, ARISTOTLE, and ROCKET-AF, stratified by risk of stroke and assessment method**

| Patient population                         | Anticoagulant eligibility                                                                                          | GPRD AF patient population, N (%) | RE-LY<br>GPRD AF patients meeting trial criteria, n (% [95% CI]) | ARISTOTLE<br>GPRD AF patients meeting trial criteria n (% [95% CI]) | ROCKET-AF<br>GPRD AF patients meeting trial criteria, n (% [95% CI]) |
|--------------------------------------------|--------------------------------------------------------------------------------------------------------------------|-----------------------------------|------------------------------------------------------------------|---------------------------------------------------------------------|----------------------------------------------------------------------|
| Total GPRD AF population                   | Not anticoagulant-eligible/potentially anticoagulant-eligible/should receive anticoagulant according to guidelines | 83,898 (100%)                     | 53,640 (64% [63.59-64.41])                                       | 51,415 (61% [60.58-61.42])                                          | 39,892 (48% [47.66-48.34])                                           |
| <b>Intermediate- or high-risk patients</b> |                                                                                                                    |                                   |                                                                  |                                                                     |                                                                      |
| CHADS <sub>2</sub> ≥1                      | Potentially anticoagulant-eligible/should receive anticoagulant according to guidelines                            | 71,493 (85%)                      | 52,783 (74% [73.68-74.32])                                       | 51,415 (72% [71.67-72.33])                                          | 39,892 (56% [55.64-56.36])                                           |
| CHA <sub>2</sub> DS <sub>2</sub> -VASC ≥1  | Potentially anticoagulant-eligible/should receive anticoagulant according to guidelines                            | 78,783 (94%)                      | 53,640 (68% [67.67-68.33])                                       | 51,163 (65% [64.67-65.33])                                          | 39,892 (51% [50.65-51.35])                                           |
| <b>High-risk patients</b>                  |                                                                                                                    |                                   |                                                                  |                                                                     |                                                                      |
| CHADS <sub>2</sub> ≥2                      | Should receive anticoagulant according to guidelines                                                               | 49,099 (59%)                      | 38,493 (78% [77.63-78.37])                                       | 35,712 (73% [72.61-73.39])                                          | 39,892 (81% [80.65-81.35])                                           |
| CHA <sub>2</sub> DS <sub>2</sub> -VASC ≥2  | Should receive anticoagulant according to guidelines                                                               | 72,824 (87%)                      | 53,059 (73% [72.68-73.32])                                       | 50,623 (70% [69.67-70.33])                                          | 39,835 (55% [54.64-55.36])                                           |

AF: Atrial Fibrillation; CI: Confidence Interval; GPRD: General Practice Research Database

**Table 2: Proportion of GPRD AF patients eligible for trial participation according to each inclusion/exclusion criteria identified for RE-LY, ARISTOTLE, and ROCKET-AF**

| Criterion                                                                                       | RE-LY<br>N (%) real-world AF<br>patients meeting<br>criterion | ARISTOTLE<br>N (%) real-world<br>patients meeting<br>criterion | ROCKET-AF<br>N (%) real-world<br>patients meeting<br>criterion |
|-------------------------------------------------------------------------------------------------|---------------------------------------------------------------|----------------------------------------------------------------|----------------------------------------------------------------|
| <b>Inclusion</b>                                                                                |                                                               |                                                                |                                                                |
| AF                                                                                              | 83,898 (100)                                                  | 83,898 (100)                                                   | 83,898 (100)                                                   |
| Age ≥ 75 years                                                                                  | 51,034 (61)                                                   | 51,267 (61)                                                    | 51,034 (61)                                                    |
| Stroke, TIA, systemic embolism                                                                  | 11,632 (14)                                                   | 10,577 (13)                                                    | 11,632 (14)                                                    |
| Risk factors                                                                                    |                                                               |                                                                |                                                                |
| Congestive heart failure                                                                        | 1737 (2)                                                      | 16,184 (19)                                                    | 16,009 (19)                                                    |
| Ejection fraction                                                                               |                                                               |                                                                |                                                                |
| Age ≥ 65 years                                                                                  | 70,047 (83)                                                   | -                                                              | -                                                              |
| Diabetes mellitus                                                                               | 3945 (5)                                                      | 14,940 (18)                                                    | 14,850 (18)                                                    |
| Hypertension                                                                                    | 49,747 (59)                                                   | 49,747 (59)                                                    | 67,833 (81)                                                    |
| Coronary artery disease                                                                         | 28,687 (34)                                                   | -                                                              | -                                                              |
| Overall inclusion criteria                                                                      | 64,710 (77)*                                                  | 67,956 (81)†                                                   | 52,540 (63)‡                                                   |
| <b>Exclusion</b>                                                                                |                                                               |                                                                |                                                                |
| Reversible causes of AF                                                                         | 1,124 (1)                                                     | 2,938 (4)                                                      | 350 (<1)                                                       |
| Mitral valve stenosis                                                                           | -                                                             | 1,213 (1)                                                      | 1213 (1)                                                       |
| Heart valve disorders and conditions other than AF that require chronic anticoagulant treatment | 5,202 (6)                                                     | 5,202 (6)                                                      | 5,202 (6)                                                      |
| Conditions other than AF requiring chronic anticoagulant treatment                              |                                                               |                                                                |                                                                |
| Heart valve disorder                                                                            | 4,792 (6)                                                     | -                                                              | 0 (0)                                                          |
| Stroke or TIA                                                                                   |                                                               |                                                                |                                                                |
| Recent stroke                                                                                   | 429 (1)                                                       | 62 (<1)                                                        | 429 (1)                                                        |
| Recent TIA                                                                                      | -                                                             | -                                                              | 71 (<1)                                                        |
| Increased risk of bleeding                                                                      | 1,044 (1)                                                     | 1,044 (1)                                                      | 1,044 (1)                                                      |
| Intracranial neoplasm, arteriovenous malformation, or aneurysm                                  | -                                                             | -                                                              | 2350 (3)                                                       |
| Uncontrolled hypertension                                                                       | 2,014 (2)                                                     | 2,014 (2)                                                      | 2,014 (2)                                                      |
| Planned cardioversion                                                                           | -                                                             | -                                                              | 843 (1)                                                        |
| Renal impairment                                                                                | 2,149 (3)                                                     | 2,149 (3)                                                      | 2,149 (3)                                                      |
| ASA at specified dose                                                                           | -                                                             | 1,629 (2)                                                      | 1,767 (2)                                                      |
| ASA + thienopyridine                                                                            | -                                                             | 203 (<1)                                                       | 203 (<1)                                                       |
| Intravenous antiplatelets                                                                       | -                                                             | -                                                              | 0 (0)                                                          |
| Other concomitant treatments                                                                    |                                                               |                                                                |                                                                |
| Fibrinolytics                                                                                   | 0 (0)                                                         | -                                                              | 0 (0)                                                          |
| NSAID                                                                                           | -                                                             | -                                                              | 2,729 (3)                                                      |
| P450 3A4 inhibitor                                                                              | -                                                             | -                                                              | 4 (<1)                                                         |
| P450 3A4 inducer                                                                                | -                                                             | -                                                              | 1,125 (1)                                                      |
| Investigational drug                                                                            | 0 (0)                                                         | 0 (0)                                                          | 0 (0)                                                          |
| Other concomitant conditions                                                                    |                                                               |                                                                |                                                                |
| Liver disease                                                                                   | 1,547 (2)                                                     | -                                                              | 1,547 (2)                                                      |
| Hepatitis A, B, or C                                                                            | 698 (<1)                                                      | -                                                              | -                                                              |
| HIV                                                                                             | -                                                             | -                                                              | 14 (<1)                                                        |
| Active infective endocarditis                                                                   | 8 (<1)                                                        | 8 (<1)                                                         | 8 (<1)                                                         |
| Anemia                                                                                          | 794 (1)                                                       | 794 (1)                                                        | 794 (1)                                                        |
| Substance abuse and psychosocial                                                                | 28 (<1)                                                       | 28 (<1)                                                        | -                                                              |
| INR monitoring                                                                                  | -                                                             | 3,513 (4)                                                      | -                                                              |
| <b>Overall inclusion and exclusion criteria</b>                                                 | <b>53,640 (64%)</b>                                           | <b>51,415 (61%)</b>                                            | <b>39,892 (48%)</b>                                            |

\*Inclusion criteria for RE-LY specify AF plus at least one of age ≥75 years; history of previous stroke, TIA or systemic embolism; ejection fraction <40%; or symptomatic heart failure OR AF plus age ≥65 years plus one of diabetes mellitus; documented coronary artery disease; or hypertension requiring medical treatment<sup>7</sup>

†Inclusion criteria for ARISTOTLE specify AF plus at least one of age ≥75 years; prior stroke; symptomatic congestive heart failure or ejection fraction ≤40%; diabetes; or hypertension requiring pharmacological treatment<sup>23</sup>

‡Inclusion criteria for ROCKET-AF specify AF plus history of stroke, TIA, or systemic embolism OR AF plus at least two of age ≥75 years; congestive heart failure or ejection fraction ≤35%; or diabetes; or hypertension<sup>22</sup>

Note that the planned cardioversion exclusion criterion within the ROCKET-AF trial was conceptualised within the study by excluding patients having cardioversion within 12 months of the index date

1  
2  
3 AF: Atrial Fibrillation; ASA: acetylsalicylic acid; GPRD: General Practice Research Database; HIV: Human Immunodeficiency  
4 Virus; INR: International Normalised Ratio; NSAID: Non-Steroidal Anti-Inflammatory Drug; TIA: Transient Ischemic Attack  
5  
6  
7  
8  
9  
10  
11  
12  
13  
14  
15  
16  
17  
18  
19  
20  
21  
22  
23  
24  
25  
26  
27  
28  
29  
30  
31  
32  
33  
34  
35  
36  
37  
38  
39  
40  
41  
42  
43  
44  
45  
46  
47  
48  
49  
50  
51  
52  
53  
54  
55  
56  
57  
58  
59  
60

For peer review only

## Supplementary data

A description of the inclusion and exclusion criteria for each trial is provided in the table.

**Table: Inclusion/exclusion criteria for RE-LY, ARISTOTLE, and ROCKET-AF**

| Criterion type                                                                                  | RE-LY                                                                                                                                                                                                                                                                                                                                                                                                                                                                                                                                                          | ARISTOTLE                                                                                                                                                                                                                                                                 | ROCKET-AF                                                                                                                                                                                                                                                                                                                                                                                                                                                                                                                                   |
|-------------------------------------------------------------------------------------------------|----------------------------------------------------------------------------------------------------------------------------------------------------------------------------------------------------------------------------------------------------------------------------------------------------------------------------------------------------------------------------------------------------------------------------------------------------------------------------------------------------------------------------------------------------------------|---------------------------------------------------------------------------------------------------------------------------------------------------------------------------------------------------------------------------------------------------------------------------|---------------------------------------------------------------------------------------------------------------------------------------------------------------------------------------------------------------------------------------------------------------------------------------------------------------------------------------------------------------------------------------------------------------------------------------------------------------------------------------------------------------------------------------------|
| <b>Inclusion</b>                                                                                |                                                                                                                                                                                                                                                                                                                                                                                                                                                                                                                                                                |                                                                                                                                                                                                                                                                           |                                                                                                                                                                                                                                                                                                                                                                                                                                                                                                                                             |
| Age                                                                                             | ≥18 years                                                                                                                                                                                                                                                                                                                                                                                                                                                                                                                                                      | ≥18 years                                                                                                                                                                                                                                                                 | ≥18 years                                                                                                                                                                                                                                                                                                                                                                                                                                                                                                                                   |
| AF                                                                                              | AF documented by ECG on enrolment; or symptomatic episode of paroxysmal or persistent AF documented by 12-lead ECG within 6 months before randomisation; or asymptomatic or symptomatic paroxysmal or persistent AF on 2 separate occasions, at least 1 day apart, one of which is within 6 months of randomisation, lasting ≥30 seconds and documented by 12-lead ECG, rhythm strip, pacemaker/ICD electrogram or Holter monitor                                                                                                                              | AF or atrial flutter documented by ECG on enrolment; or AF or atrial flutter documented by ECG or as an episode lasting ≥1 minute on rhythm strip, Holter monitor, or intracardiac recording on 2 separate occasions at least 2 weeks apart in 12 months before enrolment | AF documented by ECG evidence (e.g. 12-lead ECG, rhythm strip, Holter monitor, or pacemaker interrogation) within 30 days of randomisation plus medical evidence (e.g. from medical chart, hospital discharge summary) of atrial fibrillation within 1 year before and at least one day before the qualifying ECG evidence. Subjects with newly diagnosed AF are eligible permitting: there is evidence that the AF is non-valvular; cardioversion is not planned; and there is ECG evidence on 2 occasions 24 hours apart demonstrating AF |
| Risk factors                                                                                    | At least 1 of: history of stroke, transient ischemic attack, or systemic embolism; ejection fraction ≤40% documented by ECG, radionuclide, or contrast angiogram in the last 6 months; symptomatic heart failure, age ≥75 years; OR age at least 65 years with at least one of: diabetes mellitus on treatment; documented coronary artery disease (prior MI, positive stress test, positive nuclear perfusion study, prior CABG surgery or PCI, angiogram showing at least 75% stenosis in a major coronary artery); hypertension requiring medical treatment | At least one of: history of stroke, transient ischemic attack, or systemic embolus; symptomatic heart failure; ejection fraction ≤40% documented by ECG, radionuclide, or contrast angiogram; age ≥75 years; diabetes mellitus; hypertension requiring medical treatment  | History of stroke, TIA, or non-CNS systemic embolism; OR at least 2 of: heart failure and/or left ventricular fraction ≤35%; hypertension defined by use of antihypertensive within 6 months of screening visit or systolic blood pressure ≥140 mm Hg or diastolic blood pressure ≥90 mm Hg*; age ≥75 years; diabetes mellitus defined as history of type 1 or type 2 diabetes mellitus or use of antidiabetic medications within 6 months of screening visit                                                                               |
| <b>Exclusion</b>                                                                                |                                                                                                                                                                                                                                                                                                                                                                                                                                                                                                                                                                |                                                                                                                                                                                                                                                                           |                                                                                                                                                                                                                                                                                                                                                                                                                                                                                                                                             |
| Reversible causes of AF                                                                         | Reversible causes of AF (e.g. cardiac surgery, pulmonary embolism, or untreated hyperparathyroidism)                                                                                                                                                                                                                                                                                                                                                                                                                                                           | Reversible causes of AF (e.g. thyrotoxicosis or pericarditis)                                                                                                                                                                                                             | Reversible causes of AF (i.e. thyrotoxicosis)                                                                                                                                                                                                                                                                                                                                                                                                                                                                                               |
| Mitral valve stenosis                                                                           | -                                                                                                                                                                                                                                                                                                                                                                                                                                                                                                                                                              | Clinically significant moderate or severe mitral valve stenosis                                                                                                                                                                                                           | Haemodynamically significant mitral valve stenosis                                                                                                                                                                                                                                                                                                                                                                                                                                                                                          |
| Heart valve disorders and conditions other than AF that require chronic anticoagulant treatment | History of heart valve disorder (e.g. prosthetic valve or haemodynamically relevant valve disease); anticoagulant treatment for disorders other than AF                                                                                                                                                                                                                                                                                                                                                                                                        | Prosthetic mechanical heart valve; anticoagulant treatment for disorders other than AF                                                                                                                                                                                    | Prosthetic heart valve; anticoagulant treatment for disorders other than AF                                                                                                                                                                                                                                                                                                                                                                                                                                                                 |
| Recent stroke or TIA                                                                            | Severe, disabling stroke within 6 months, or any stroke within 14 days                                                                                                                                                                                                                                                                                                                                                                                                                                                                                         | Stroke within 7 days                                                                                                                                                                                                                                                      | Severe, disabling stroke within 3 months or any stroke within 14 days; TIA within 3 days                                                                                                                                                                                                                                                                                                                                                                                                                                                    |
| Concomitant conditions associated with increased risk of bleeding                               | Major surgery within one month; planned surgery or intervention within next three months; history of intracranial, intraocular, spinal,                                                                                                                                                                                                                                                                                                                                                                                                                        | Planned major surgery; platelet count ≤100,000/mm <sup>3</sup> ; uncontrolled hypertension (systolic blood pressure ≥180 mmHg and/or diastolic blood                                                                                                                      | Active internal bleeding; major surgical procedure or trauma within 30 days of randomisation; clinically significant GI bleeding within                                                                                                                                                                                                                                                                                                                                                                                                     |

| Criterion type                         | RE-LY                                                                                                                                                                                                                                                                                                                                                                                                                       | ARISTOTLE                                                                                                                                                                          | ROCKET-AF                                                                                                                                                                                                                                                                                                                                                                                                                                                                                                                                                 |
|----------------------------------------|-----------------------------------------------------------------------------------------------------------------------------------------------------------------------------------------------------------------------------------------------------------------------------------------------------------------------------------------------------------------------------------------------------------------------------|------------------------------------------------------------------------------------------------------------------------------------------------------------------------------------|-----------------------------------------------------------------------------------------------------------------------------------------------------------------------------------------------------------------------------------------------------------------------------------------------------------------------------------------------------------------------------------------------------------------------------------------------------------------------------------------------------------------------------------------------------------|
|                                        | retroperitoneal or atraumatic intra-articular bleeding; GI haemorrhage within the past year; symptomatic or endoscopically documented gastroduodenal ulcer disease in the previous 30 days; haemorrhagic disorder; uncontrolled hypertension (systolic blood pressure $\geq 180$ mmHg and/or diastolic blood pressure $\geq 100$ mmHg); malignancy or radiation therapy within 6 months and not expected to survive 3 years | pressure $\geq 100$ mmHg)                                                                                                                                                          | six months of randomisation; history of intracranial, intraocular, spinal, or intra-articular bleeding; chronic haemorrhagic disorder; known intracranial neoplasm, arteriovenous malformation or aneurysm; planned invasive procedure with potential for uncontrolled bleeding; platelet count $< 90,000/\mu\text{L}$ at screening; uncontrolled hypertension (systolic blood pressure $\geq 180$ mmHg and/or diastolic blood pressure $\geq 100$ mmHg); malignancy or radiation therapy within 6 months and not expected to survive three years         |
| Planned AF ablation procedure          | Planned AF ablation procedure                                                                                                                                                                                                                                                                                                                                                                                               | Planned AF ablation procedure                                                                                                                                                      | -                                                                                                                                                                                                                                                                                                                                                                                                                                                                                                                                                         |
| Planned cardioversion                  | -                                                                                                                                                                                                                                                                                                                                                                                                                           | -                                                                                                                                                                                  | Planned cardioversion                                                                                                                                                                                                                                                                                                                                                                                                                                                                                                                                     |
| Renal impairment                       | Creatine clearance $\leq 30$ mL/minute                                                                                                                                                                                                                                                                                                                                                                                      | Creatine clearance $< 25$ mL/minute or serum creatine $< 2.5$ mg/dL                                                                                                                | Creatine clearance $< 30$ mL/minute                                                                                                                                                                                                                                                                                                                                                                                                                                                                                                                       |
| Contraindication to warfarin treatment | Contraindication to warfarin treatment                                                                                                                                                                                                                                                                                                                                                                                      | -                                                                                                                                                                                  | Contraindication to warfarin treatment                                                                                                                                                                                                                                                                                                                                                                                                                                                                                                                    |
|                                        |                                                                                                                                                                                                                                                                                                                                                                                                                             |                                                                                                                                                                                    | Treatment with $> 100$ mg ASA daily; ASA in combination with thienopyridines within 5 days of randomisation; intravenous antiplatelets within 5 days of randomisation; fibrinolytic agents within 10 days of randomisation; anticipated need for chronic treatment with NSAID; systemic treatment with a strong inhibitor of cytochrome P450 3A4 within 4 days of randomisation or anticipated treatment during study; systemic treatment with strong inducer of cytochrome P450 3A4 within 4 days of randomisation or anticipated treatment during study |
| Concomitant treatments                 | Fibrinolytic agents within 48 hours of study entry; investigational drug within 30 days                                                                                                                                                                                                                                                                                                                                     | Treatment with $> 165$ mg ASA daily; ASA in combination with thienopyridines; investigational drug within 30 days                                                                  |                                                                                                                                                                                                                                                                                                                                                                                                                                                                                                                                                           |
|                                        |                                                                                                                                                                                                                                                                                                                                                                                                                             |                                                                                                                                                                                    | Left ventricular thrombus; HIV infection; anemia at screening visit; pregnancy or breastfeeding; TIA within 3 days of randomisation; active endocarditis; known liver disease (e.g. acute clinical hepatitis, chronic active hepatitis, cirrhosis) or ALT $> 3$ ULN; severe comorbid condition with life expectancy $\leq 2$ years; substance abuse within 3 years of randomisation; psychosocial disorder                                                                                                                                                |
| Other concomitant conditions           | Active liver disease (e.g. persistent ALT, AST, or ALP $> 2$ ULN; active hepatitis C; active hepatitis B; or active hepatitis A); anemia; pregnancy; active infection endocarditis; substance abuse disorder; life expectancy less than duration of trial; other conditions not allowing safe participation                                                                                                                 | ALT or AST $> 2$ ULN; total bilirubin $> 1.5$ ULN; haemoglobin level $< 9$ g/dL; pregnancy; severe comorbid condition with life expectancy $\leq 1$ year; substance abuse disorder |                                                                                                                                                                                                                                                                                                                                                                                                                                                                                                                                                           |
| INR monitoring                         | -                                                                                                                                                                                                                                                                                                                                                                                                                           | Inability to comply with INR monitoring                                                                                                                                            | -                                                                                                                                                                                                                                                                                                                                                                                                                                                                                                                                                         |

Source: <sup>1-3</sup> with clarification from <sup>4-6</sup>

\*There is a contradiction between the hypertension criterion defined in the supplementary appendix to the primary ROCKET-AF publication<sup>4</sup> and the ROCKET-AF rationale and design publication published by the ROCKET-AF trial investigators.<sup>2</sup> In this instance, the criterion from the supplementary appendix to the primary ROCKET-AF publication was used as it was deemed



more inclusive than the ROCKET-AF rationale and design publication.

AF: Atrial Fibrillation; ALP: Alkaline Phosphatase; ALT: Alanine Transaminase; ASA: acetylsalicylic acid; AST: Aspartate Transaminase; CABG: Coronary Artery Bypass Graft; ECG: Echocardiogram; GI: Gastrointestinal; HIV: Human Immunodeficiency Virus; MI: Myocardial Infarction; NSAID: Non-Steroidal Anti-Inflammatory Drug; PCI: Percutaneous Coronary Intervention; Transient Ischemic Attack; ULN: Upper Limit of Normal

## References

- 1 Ezekowitz MD, Connolly S, Parekh A, et al. Rationale and design of RE-LY: randomized evaluation of long-term anticoagulant therapy, warfarin, compared with dabigatran. *Am Heart J* 2009;**157**:805-10, 810.
- 2 Patel M. Rivaroxaban once-daily, oral, direct factor Xa inhibition compared with vitamin K antagonism for prevention of stroke and embolism trial in atrial fibrillation: rationale and design of the ROCKET AF study. *Am Heart J* 2010;**159**:340-7.
- 3 Lopes RD, Alexander JH, Al-Khatib SM, et al. Apixaban for reduction in stroke and other thromboembolic events in atrial fibrillation (ARISTOTLE) trial: design and rationale. *Am Heart J* 2010;**159**:331-9.
- 4 Patel MR, Mahaffey KW, Garg J, et al. Rivaroxaban versus warfarin in nonvalvular atrial fibrillation (with supplementary appendix). *New Engl J Med* 2011;**365**:883-91.
- 5 Granger CB, Alexander JH, McMurray JJV, et al. Apixaban versus warfarin in patients with atrial fibrillation (with supplementary appendix and study protocol). *New Engl J Med* 2011;**365**:981-92.
- 6 Connolly SJ, Ezekowitz MD, Yusuf S, et al. Dabigatran versus warfarin in patients with atrial fibrillation (with supplementary appendix). *N Engl J Med* 2009;**361**:1139-51.
